# Supplementary material for: Structure-guided loop grafting improves expression and stability of influenza neuraminidase for vaccine development
Source: eLife journal article supplement (doi:10.7554/elife.105317), 2025-03-20
Supplement: fig3-figsupp1-data2 [file elife-105317-fig3-figsupp1-data2-v1.zip]

BS-3 cross-linked Gel 1

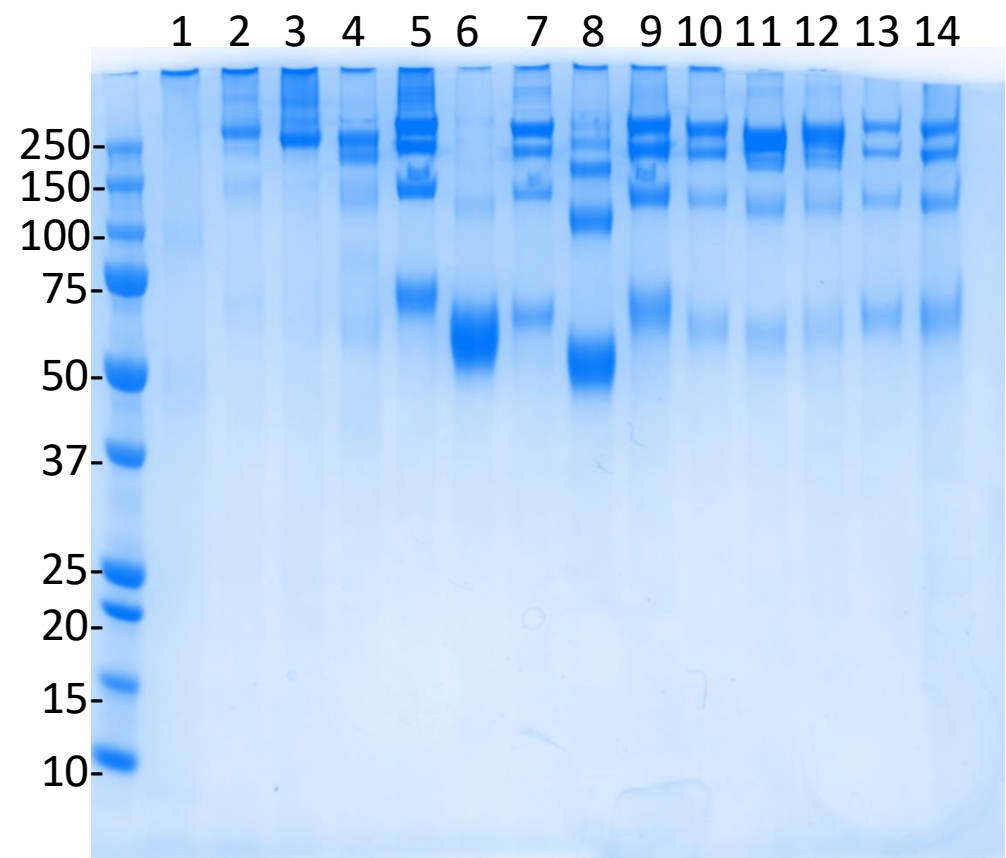

BS-3 cross-linked Gel 2

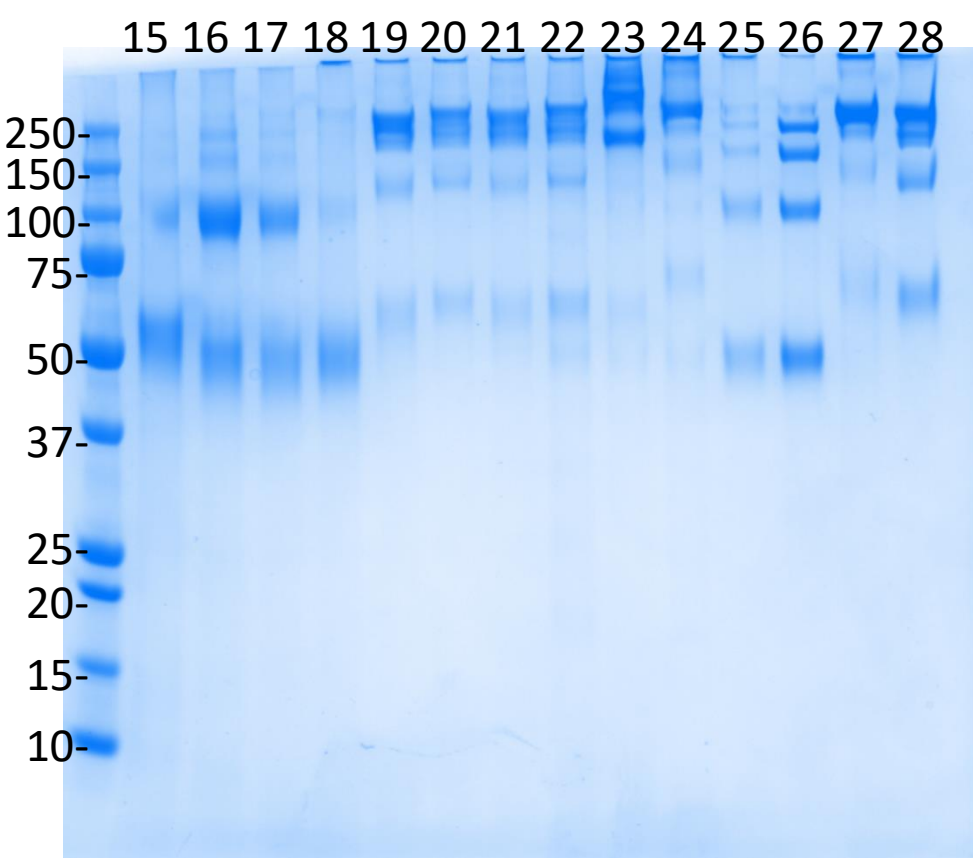

| Lanes | Protein Name |
|-------|--------------|
| 4     | N1/09        |
| 11    | mSN1         |
| 12    | PR8 N1       |
| 19    | N1/09 hybrid |
| 20    | N1/19 hybrid |
| 21    | PR8 hybrid   |
| 22    | mS hybrid    |
