# Supplementary material for: Structure-guided loop grafting improves expression and stability of influenza neuraminidase for vaccine development
Source: eLife. 2025 Sep 9;14:RP105317. doi: 10.7554/eLife.105317 (PMC12419796; doi:10.7554/eLife.105317)
Supplement: Figure 3—source data 1. [file elife-105317-fig3-data1.xlsx]

## Sheet: SEC
	msN1			N1/09			N1/09 hybrid			N1/19 hybrid			PR8 N1			PR8 N1 hybrid			mS hybrid
	Elution volume (mL)	mAU			mAU			mAU			mAU			mAU		ml	mAU		ml	mAU
	0.00051	-0.003312		0.000182	0.003235		0.000651	-0.00057		0.000549	0.000418		-2.3894	0		-2.38907	-4.20505		-2.38786	1.16911
	0.001197	-0.003652		0.000871	0.002828		0.001943	-0.000647		0.001856	0.001095		-2.38872	0.277549		-2.38842	-4.21311		-2.38722	1.16895
	0.001885	-0.003869		0.001561	0.003255		0.003233	-0.000685		0.003164	0.001434		-2.38803	0.27698		-2.38777	-4.21265		-2.38658	1.16976
	0.002572	-0.00372		0.00225	0.003427		0.004524	-0.000156		0.004472	0.001655		-2.38735	0.276377		-2.38713	-4.21162		-2.38594	1.17045
	0.003259	-0.004186		0.00294	0.003393		0.005816	-6.8e-05		0.00578	0.002644		-2.38666	0.275413		-2.38648	-4.21106		-2.38529	1.17113
	0.003947	-0.004253		0.003629	0.003406		0.007106	0.00023		0.007088	0.002692		-2.38598	0.275139		-2.38584	-4.21138		-2.38465	1.17084
	0.004634	-0.00409		0.004318	0.003488		0.008397	0.001304		0.008396	0.003515		-2.3853	0.275155		-2.38519	-4.211		-2.38401	1.17066
	0.005322	-0.003936		0.005008	0.0033		0.009688	0.001646		0.009704	0.004559		-2.38461	0.273847		-2.38455	-4.21111		-2.38337	1.17136
	0.006009	-0.003854		0.005697	0.003553		0.01098	0.001928		0.011012	0.005319		-2.38393	0.27114		-2.3839	-4.20592		-2.38273	1.17226
	0.006696	-0.003764		0.006387	0.003166		0.01227	0.002601		0.012319	0.005417		-2.38325	0.26907		-2.38325	-4.19991		-2.38208	1.17178
	0.007383	-0.004082		0.007076	0.003155		0.013561	0.003161		0.013627	0.005218		-2.38256	0.268123		-2.38261	-4.19781		-2.38144	1.17208
	0.008071	-0.004286		0.007765	0.003318		0.014853	0.00193		0.014935	0.005551		-2.38188	0.268434		-2.38196	-4.19812		-2.3808	1.17194
	0.008758	-0.004955		0.008455	0.003317		0.016143	0.002834		0.016243	0.005871		-2.38119	0.268465		-2.38132	-4.19806		-2.38015	1.17105
	0.009445	-0.005583		0.009144	0.003306		0.017434	0.002959		0.017551	0.005607		-2.38051	0.268963		-2.38067	-4.19822		-2.37951	1.17148
	0.010133	-0.005954		0.009833	0.00314		0.018725	0.002285		0.018859	0.006179		-2.37983	0.26836		-2.38002	-4.19867		-2.37887	1.17183
	0.01082	-0.006444		0.010523	0.003826		0.020017	0.001209		0.020167	0.007027		-2.37914	0.267976		-2.37938	-4.19826		-2.37823	1.17195
	0.011508	-0.006232		0.011212	0.004153		0.021307	0.001559		0.021475	0.007763		-2.37846	0.268842		-2.37873	-4.19827		-2.37758	1.17237
	0.012195	-0.006713		0.011902	0.003943		0.022598	0.001813		0.022782	0.008211		-2.37777	0.268999		-2.37809	-4.19888		-2.37694	1.1731
	0.012882	-0.00716		0.012591	0.003643		0.02389	0.001821		0.02409	0.008274		-2.37709	0.268433		-2.37744	-4.19968		-2.3763	1.17311
	0.013569	-0.007254		0.01328	0.004009		0.02518	0.00146		0.025398	0.007808		-2.37641	0.267727		-2.3768	-4.2003		-2.37566	1.17355
	0.014257	-0.007206		0.01397	0.004562		0.026471	0.000539		0.026706	0.009305		-2.37572	0.2676		-2.37615	-4.20059		-2.37501	1.1742
	0.014944	-0.007886		0.014659	0.004837		0.027762	0.001608		0.028014	0.010547		-2.37504	0.268113		-2.3755	-4.20057		-2.37437	1.17433
	0.015631	-0.008899		0.015348	0.005061		0.029054	0.001587		0.029322	0.010916		-2.37435	0.268542		-2.37486	-4.2003		-2.37373	1.17532
	0.016319	-0.0093		0.016038	0.005442		0.030344	0.001284		0.03063	0.012013		-2.37367	0.268448		-2.37421	-4.20028		-2.37309	1.17597
	0.017006	-0.009274		0.016727	0.00594		0.031635	0.001576		0.031938	0.013404		-2.37299	0.267989		-2.37357	-4.20041		-2.37245	1.17626
	0.017694	-0.009398		0.017417	0.005932		0.032927	0.001138		0.033245	0.014878		-2.3723	0.268135		-2.37292	-4.20026		-2.3718	1.17626
	0.018381	-0.00999		0.018106	0.006679		0.034217	0.001408		0.034553	0.016197		-2.37162	0.268677		-2.37228	-4.19979		-2.37116	1.17653
	0.019068	-0.010379		0.018795	0.007029		0.035508	0.002397		0.035861	0.017181		-2.37094	0.269018		-2.37163	-4.19945		-2.37052	1.17637
	0.019755	-0.010028		0.019485	0.007056		0.036799	0.003916		0.037169	0.017634		-2.37025	0.268823		-2.37099	-4.1991		-2.36988	1.17612
	0.020443	-0.010497		0.020174	0.006807		0.038091	0.005469		0.038477	0.018286		-2.36957	0.26948		-2.37034	-4.19922		-2.36923	1.17613
	0.02113	-0.010477		0.020864	0.006273		0.039381	0.005337		0.039785	0.018764		-2.36889	0.269738		-2.36969	-4.19907		-2.36859	1.17687
	0.021817	-0.010203		0.021553	0.005651		0.040672	0.005618		0.041093	0.018692		-2.3682	0.270483		-2.36905	-4.1983		-2.36795	1.17605
	0.022505	-0.010352		0.022242	0.005793		0.041964	0.006043		0.042401	0.017587		-2.36752	0.271308		-2.3684	-4.19895		-2.36731	1.17585
	0.023192	-0.009887		0.022932	0.006181		0.043254	0.006175		0.043708	0.018336		-2.36683	0.254351		-2.36776	-4.19977		-2.36666	1.176
	0.02388	-0.010309		0.023621	0.005964		0.044545	0.005545		0.045016	0.018557		-2.36615	0.033349		-2.36711	-4.20011		-2.36602	1.07757
	0.024567	-0.010755		0.024311	0.005681		0.045836	0.00521		0.046324	0.018383		-2.36546	0.000456		-2.36646	-3.87495		-2.36538	0.160434
	0.025254	-0.011198		0.025	0.006659		0.047128	0.005382		0.047632	0.01844		-2.36478	0.000602		-2.36582	-0.754312		-2.36474	0.000369
	0.025941	-0.011681		0.025689	0.006476		0.048418	0.005788		0.04894	0.018671		-2.3641	0.000493		-2.36517	-0.000622		-2.36409	0.00073
	0.026629	-0.012189		0.026379	0.00647		0.049709	0.005577		0.050248	0.018555		-2.36341	0.000556		-2.36453	-0.00155		-2.36345	0.001126
	0.027316	-0.012355		0.027068	0.006105		0.051001	0.004863		0.051556	0.01875		-2.36273	0.001344		-2.36388	-0.002568		-2.36281	0.001876
	0.028003	-0.012861		0.027757	0.006018		0.052292	0.004657		0.052864	0.019282		-2.36205	0.001328		-2.36324	-0.003021		-2.36217	0.001935
	0.028691	-0.013206		0.028447	0.006256		0.053582	0.004844		0.054171	0.019672		-2.36136	0.000905		-2.36259	-0.00337		-2.36152	0.002286
	0.029378	-0.01357		0.029136	0.006058		0.054873	0.003857		0.055479	0.019727		-2.36068	0.001156		-2.36194	-0.003924		-2.36088	0.002826
	0.030066	-0.014235		0.029825	0.005489		0.056165	0.003396		0.056787	0.019798		-2.36	0.001713		-2.3613	-0.004727		-2.36024	0.003392
	0.030753	-0.01456		0.030515	0.005014		0.057455	0.003196		0.058095	0.019623		-2.35931	0.002021		-2.36065	-0.005207		-2.3596	0.003914
	0.03144	-0.014769		0.031204	0.004933		0.058746	0.003219		0.059403	0.019113		-2.35863	0.002507		-2.36001	-0.005033		-2.35895	0.004254
	0.032127	-0.014917		0.031894	0.005051		0.060038	0.003454		0.060711	0.018678		-2.35794	0.002315		-2.35936	-0.005145		-2.35831	0.004819
	0.032815	-0.014906		0.032583	0.00524		0.061329	0.004082		0.062019	0.018632		-2.35726	0.002255		-2.35872	-0.005584		-2.35767	0.005748
	0.033502	-0.014773		0.033273	0.005541		0.062619	0.004307		0.063327	0.018394		-2.35657	0.002403		-2.35807	-0.005802		-2.35703	0.007046
	0.034189	-0.01567		0.033962	0.005223		0.06391	0.004385		0.064634	0.018247		-2.35589	0.002538		-2.35742	-0.005647		-2.35638	0.006645
	0.034877	-0.016465		0.034651	0.005164		0.065202	0.004485		0.065942	0.018595		-2.35521	0.002113		-2.35678	-0.005662		-2.35574	0.007065
	0.035564	-0.016346		0.035341	0.005512		0.066492	0.004774		0.06725	0.018857		-2.35452	0.00204		-2.35613	-0.005878		-2.3551	0.007866
	0.036252	-0.016067		0.03603	0.0058		0.067783	0.005253		0.068558	0.018318		-2.35384	0.002193		-2.35549	-0.006052		-2.35446	0.008488
	0.036939	-0.016057		0.036719	0.005878		0.069075	0.004991		0.069866	0.017985		-2.35316	0.002487		-2.35484	-0.00603		-2.35381	0.008495
	0.037626	-0.016183		0.037409	0.006198		0.070366	0.00489		0.071174	0.018097		-2.35247	0.00284		-2.35419	-0.005674		-2.35317	0.008907
	0.038313	-0.016065		0.038098	0.005796		0.071656	0.006256		0.072482	0.018398		-2.35179	0.002958		-2.35355	-0.00537		-2.35253	0.009589
	0.039001	-0.015988		0.038788	0.005731		0.072948	0.005109		0.07379	0.017451		-2.35111	0.002969		-2.3529	-0.005594		-2.35189	0.010343
	0.039688	-0.016205		0.039477	0.005499		0.074239	0.006066		0.075097	0.016497		-2.35042	0.003281		-2.35226	-0.00625		-2.35125	0.010898
	0.040375	-0.016144		0.040166	0.005098		0.075529	0.006516		0.076405	0.015639		-2.34974	0.004015		-2.35161	-0.006957		-2.3506	0.011048
	0.041063	-0.015735		0.040856	0.004799		0.07682	0.005411		0.077713	0.014885		-2.34905	0.004484		-2.35097	-0.006342		-2.34996	0.011254
	0.04175	-0.015823		0.041545	0.005138		0.078112	0.004929		0.079021	0.014061		-2.34837	0.004375		-2.35032	-0.007123		-2.34932	0.011697
	0.042438	-0.014761		0.042234	0.005556		0.079403	0.004117		0.080329	0.013704		-2.34769	0.003964		-2.34967	-0.007875		-2.34868	0.012226
	0.043125	-0.014521		0.042924	0.005508		0.080693	0.00434		0.081637	0.013818		-2.347	0.003876		-2.34903	-0.007842		-2.34803	0.012242
	0.043812	-0.014496		0.043613	0.005069		0.081985	0.004963		0.082945	0.014532		-2.34632	0.004848		-2.34838	-0.007868		-2.34739	0.011866
	0.044499	-0.014456		0.044303	0.004903		0.083276	0.004324		0.084253	0.015764		-2.34563	0.004478		-2.34774	-0.008246		-2.34675	0.011739
	0.045187	-0.014435		0.044992	0.005276		0.084566	0.005058		0.08556	0.01451		-2.34495	0.004026		-2.34709	-0.008168		-2.34611	0.011757
	0.045874	-0.014772		0.045681	0.005453		0.085857	0.006252		0.086868	0.013934		-2.34427	0.003799		-2.34645	-0.008711		-2.34546	0.012142
	0.046561	-0.014966		0.046371	0.005964		0.087149	0.006965		0.088176	0.013216		-2.34358	0.003597		-2.3458	-0.009165		-2.34482	0.01219
	0.047249	-0.014775		0.04706	0.006085		0.08844	0.006869		0.089484	0.012573		-2.3429	0.003231		-2.34515	-0.009604		-2.34418	0.011379
	0.047936	-0.01463		0.04775	0.005834		0.08973	0.007315		0.090792	0.013161		-2.34221	0.002366		-2.34451	-0.010209		-2.34354	0.011172
	0.048624	-0.014098		0.048439	0.006115		0.091022	0.006734		0.0921	0.012677		-2.34153	0.001898		-2.34386	-0.010521		-2.34289	0.01233
	0.049311	-0.012778		0.049128	0.005276		0.092313	0.008865		0.093408	0.012211		-2.34085	0.002198		-2.34322	-0.010735		-2.34225	0.013513
	0.049998	-0.012699		0.049818	0.004814		0.093603	0.007669		0.094716	0.011835		-2.34016	0.002065		-2.34257	-0.011802		-2.34161	0.01625
	0.050685	-0.012744		0.050507	0.004542		0.094894	0.00794		0.096023	0.011538		-2.33948	0.003034		-2.34193	-0.011292		-2.34097	0.018708
	0.051373	-0.012715		0.051196	0.005087		0.096186	0.009522		0.097331	0.011523		-2.3388	0.00369		-2.34128	-0.012208		-2.34032	0.020955
	0.05206	-0.012664		0.051886	0.005216		0.097477	0.011092		0.098639	0.011196		-2.33811	0.003012		-2.34063	-0.012118		-2.33968	0.023399
	0.052747	-0.012537		0.052575	0.004853		0.098767	0.012439		0.099947	0.011456		-2.33743	0.002702		-2.33999	-0.011268		-2.33904	0.025328
	0.053435	-0.012162		0.053265	0.004583		0.100059	0.012013		0.101255	0.012247		-2.33674	0.00299		-2.33934	-0.010336		-2.3384	0.027053
	0.054122	-0.011445		0.053954	0.004375		0.10135	0.011068		0.102563	0.013069		-2.33606	0.003113		-2.3387	-0.009841		-2.33775	0.028958
	0.05481	-0.011356		0.054643	0.004783		0.102641	0.011217		0.103871	0.01265		-2.33538	0.003062		-2.33805	-0.010029		-2.33711	0.031152
	0.055497	-0.011147		0.055333	0.005192		0.103931	0.009468		0.105178	0.013023		-2.33469	0.001994		-2.3374	-0.010637		-2.33647	0.031986
	0.056184	-0.010715		0.056022	0.004722		0.105223	0.009974		0.106486	0.012807		-2.33401	0.00135		-2.33676	-0.010717		-2.33583	0.032901
	0.056871	-0.010312		0.056711	0.00404		0.106514	0.009589		0.107794	0.012012		-2.33332	-1.6e-05		-2.33611	-0.010552		-2.33519	0.034477
	0.057559	-0.010454		0.057401	0.003079		0.107804	0.009139		0.109102	0.012919		-2.33264	-0.000635		-2.33547	-0.010195		-2.33454	0.036011
	0.058246	-0.010894		0.05809	0.001619		0.109096	0.008323		0.11041	0.012844		-2.33196	-0.000572		-2.33482	-0.00961		-2.3339	0.03784
	0.058933	-0.010732		0.05878	0.001895		0.110387	0.0081		0.111718	0.01328		-2.33127	-0.001028		-2.33418	-0.009671		-2.33326	0.03966
	0.059621	-0.010529		0.059469	0.001643		0.111678	0.008545		0.113026	0.013421		-2.33059	-0.001637		-2.33353	-0.010519		-2.33262	0.040544
	0.060308	-0.010369		0.060158	0.001521		0.112968	0.008149		0.114334	0.012582		-2.32991	-0.00234		-2.33289	-0.010944		-2.33197	0.041165
	0.060996	-0.010384		0.060848	0.00145		0.11426	0.007587		0.115641	0.01214		-2.32922	5.9e-05		-2.33224	-0.010703		-2.33133	0.042408
	0.061683	-0.011308		0.061537	-0.000116		0.115551	0.006966		0.116949	0.011747		-2.32854	0.013513		-2.33159	-0.010081		-2.33069	0.043664
	0.06237	-0.011147		0.062227	-0.000647		0.116841	0.006357		0.118257	0.010796		-2.32785	0.052818		-2.33095	-0.00955		-2.33005	0.044024
	0.063057	-0.011746		0.062916	-0.000838		0.118133	0.00491		0.119565	0.009545		-2.32717	0.10734		-2.3303	-0.009508		-2.3294	0.043972
	0.063745	-0.011791		0.063605	-0.001246		0.119424	0.004139		0.120873	0.008685		-2.32649	0.153087		-2.32966	-0.009238		-2.32876	0.044498
	0.064432	-0.011414		0.064295	-0.00122		0.120715	0.003151		0.122181	0.008422		-2.3258	0.179148		-2.32901	-0.008457		-2.32812	0.044969
	0.06512	-0.011484		0.064984	-0.000843		0.122005	0.0031		0.123489	0.00841		-2.32512	0.183388		-2.32836	-0.009263		-2.32748	0.045429
	0.065807	-0.011279		0.065673	-0.00102		0.123297	0.002366		0.124797	0.00806		-2.32443	0.185228		-2.32772	-0.010394		-2.32683	0.046208
	0.066494	-0.011698		0.066363	-0.000924		0.124588	0.003063		0.126104	0.007316		-2.32375	0.184163		-2.32707	-0.01101		-2.32619	0.046767
	0.067182	-0.011763		0.067052	-6.1e-05		0.125878	0.002721		0.127412	0.006934		-2.32307	0.182889		-2.32643	-0.011423		-2.32555	0.047175
	0.067869	-0.011605		0.067742	0.000148		0.12717	0.001031		0.12872	0.006677		-2.32238	0.182721		-2.32578	-0.011828		-2.32491	0.047778
	0.068556	-0.011356		0.068431	0.000267		0.128461	-0.000479		0.130028	0.007552		-2.3217	0.182887		-2.32514	-0.012176		-2.32426	0.048274
	0.069243	-0.011017		0.06912	8.5e-05		0.129752	-0.00178		0.131336	0.008098		-2.32102	0.181805		-2.32449	-0.012815		-2.32362	0.048482
	0.069931	-0.010656		0.06981	-0.000282		0.131042	-0.003457		0.132644	0.007205		-2.32033	0.180341		-2.32384	-0.014018		-2.32298	0.049436
	0.070618	-0.01055		0.070499	-0.000543		0.132334	-0.003538		0.133952	0.007339		-2.31965	0.179693		-2.3232	-0.015171		-2.32234	0.050161
	0.071306	-0.010575		0.071188	-0.001128		0.133625	-0.002665		0.13526	0.007618		-2.31896	0.178703		-2.32255	-0.015992		-2.32169	0.050661
	0.071993	-0.010488		0.071878	-0.000871		0.134915	-0.002878		0.136567	0.007564		-2.31828	0.178485		-2.32191	-0.017146		-2.32105	0.051164
	0.07268	-0.010247		0.072567	-0.00053		0.136207	-0.001125		0.137875	0.00727		-2.3176	0.176966		-2.32126	-0.017957		-2.32041	0.051002
	0.073368	-0.010144		0.073257	-0.001037		0.137498	-0.00013		0.139183	0.00708		-2.31691	0.175492		-2.32062	-0.017999		-2.31977	0.050442
	0.074055	-0.010003		0.073946	-0.00133		0.138789	-0.000882		0.140491	0.006728		-2.31623	0.175731		-2.31997	-0.018839		-2.31912	0.0504
	0.074742	-0.009931		0.074636	-0.000801		0.140079	-0.001431		0.141799	0.006721		-2.31555	0.173642		-2.31932	-0.020172		-2.31848	0.050747
	0.075429	-0.009129		0.075325	-0.00132		0.141371	-0.002381		0.143107	0.006892		-2.31486	0.172665		-2.31868	-0.019973		-2.31784	0.05099
	0.076117	-0.008177		0.076014	-0.000969		0.142662	-0.002567		0.144415	0.007051		-2.31418	0.171767		-2.31803	-0.020386		-2.3172	0.051572
	0.076804	-0.007817		0.076704	-0.002121		0.143952	-0.002406		0.145723	0.006744		-2.31349	0.170876		-2.31739	-0.021057		-2.31655	0.051961
	0.077492	-0.007581		0.077393	-0.003425		0.145244	-0.002662		0.14703	0.005726		-2.31281	0.170137		-2.31674	-0.021541		-2.31591	0.052413
	0.078179	-0.007663		0.078082	-0.004433		0.146535	-0.003148		0.148338	0.005816		-2.31213	0.168812		-2.31609	-0.022861		-2.31527	0.053063
	0.078866	-0.007358		0.078772	-0.004488		0.147826	-0.002773		0.149646	0.006228		-2.31144	0.168019		-2.31545	-0.022156		-2.31463	0.054012
	0.079554	-0.0071		0.079461	-0.004127		0.149117	-0.002152		0.150954	0.005646		-2.31076	0.167252		-2.3148	-0.022189		-2.31398	0.054852
	0.080241	-0.007026		0.080151	-0.003794		0.150408	-0.001727		0.152262	0.005646		-2.31007	0.166706		-2.31416	-0.021372		-2.31334	0.055403
	0.080928	-0.006925		0.08084	-0.003735		0.151699	-0.002278		0.15357	0.005406		-2.30939	0.165739		-2.31351	-0.021517		-2.3127	0.056103
	0.081615	-0.006401		0.081529	-0.003815		0.15299	-0.001874		0.154878	0.005395		-2.30871	0.165789		-2.31287	-0.021148		-2.31206	0.056473
	0.082303	-0.005646		0.082219	-0.003791		0.154281	-0.002221		0.156186	0.005843		-2.30802	0.165178		-2.31222	-0.020651		-2.31141	0.056202
	0.08299	-0.005621		0.082908	-0.003578		0.155572	-0.001654		0.157493	0.006844		-2.30734	0.163693		-2.31157	-0.02066		-2.31077	0.055396
	0.083678	-0.006417		0.083597	-0.002987		0.156863	-0.003098		0.158801	0.007159		-2.30666	0.162919		-2.31093	-0.0209		-2.31013	0.054656
	0.084365	-0.006943		0.084287	-0.00242		0.158154	-0.003054		0.160109	0.008668		-2.30597	0.161943		-2.31028	-0.020885		-2.30949	0.053869
	0.085052	-0.006999		0.084976	-0.002591		0.159445	-0.002206		0.161417	0.010151		-2.30529	0.16052		-2.30964	-0.02009		-2.30884	0.052552
	0.08574	-0.007016		0.085665	-0.003264		0.160736	-0.002053		0.162725	0.010906		-2.3046	0.159633		-2.30899	-0.019784		-2.3082	0.051269
	0.086427	-0.006979		0.086355	-0.003705		0.162027	-0.002391		0.164033	0.012123		-2.30392	0.159394		-2.30835	-0.019085		-2.30756	0.049851
	0.087114	-0.00764		0.087044	-0.003469		0.163318	-0.001255		0.165341	0.011991		-2.30324	0.159294		-2.3077	-0.018973		-2.30692	0.048654
	0.087801	-0.008444		0.087734	-0.00309		0.164609	-0.000523		0.166649	0.01222		-2.30255	0.159319		-2.30706	-0.01896		-2.30627	0.048101
	0.088489	-0.009146		0.088423	-0.002509		0.1659	-0.001644		0.167956	0.012658		-2.30187	0.157911		-2.30641	-0.019416		-2.30563	0.046843
	0.089176	-0.01014		0.089113	-0.00283		0.167191	-0.002064		0.169264	0.012687		-2.30118	0.156663		-2.30576	-0.018756		-2.30499	0.04528
	0.089864	-0.011702		0.089802	-0.002512		0.168482	-0.001953		0.170572	0.011997		-2.3005	0.156354		-2.30512	-0.0186		-2.30435	0.045103
	0.090551	-0.012033		0.090491	-0.001821		0.169773	-0.002842		0.17188	0.011365		-2.29982	0.156306		-2.30447	-0.018514		-2.3037	0.044904
	0.091238	-0.011151		0.091181	-0.001112		0.171064	-0.00288		0.173188	0.01107		-2.29913	0.156817		-2.30383	-0.018241		-2.30306	0.044152
	0.091926	-0.011053		0.09187	-0.001135		0.172355	-0.003011		0.174496	0.011134		-2.29845	0.157123		-2.30318	-0.019125		-2.30242	0.043043
	0.092613	-0.011137		0.092559	-0.000886		0.173646	-0.003473		0.175804	0.011359		-2.29777	0.15745		-2.30253	-0.019736		-2.30178	0.041868
	0.0933	-0.011493		0.093249	-0.002361		0.174937	-0.004614		0.177112	0.012101		-2.29708	0.157516		-2.30189	-0.018971		-2.30114	0.041453
	0.093987	-0.011611		0.093938	-0.002633		0.176228	-0.005232		0.178419	0.012987		-2.2964	0.157252		-2.30124	-0.018908		-2.30049	0.041076
	0.094675	-0.0119		0.094628	-0.002323		0.177519	-0.005799		0.179727	0.01375		-2.29571	0.156911		-2.3006	-0.018377		-2.29985	0.041075
	0.095362	-0.012439		0.095317	-0.001755		0.17881	-0.005336		0.181035	0.014146		-2.29503	0.156013		-2.29995	-0.017778		-2.29921	0.04011
	0.09605	-0.011911		0.096006	-0.001575		0.180101	-0.006627		0.182343	0.013832		-2.29435	0.152848		-2.2993	-0.017854		-2.29857	0.039202
	0.096737	-0.01158		0.096696	-0.001601		0.181392	-0.007928		0.183651	0.013439		-2.29366	0.135927		-2.29866	-0.018144		-2.29792	0.039281
	0.097424	-0.011856		0.097385	-0.001735		0.182683	-0.009409		0.184959	0.013056		-2.29298	0.092534		-2.29801	-0.017826		-2.29728	0.038911
	0.098112	-0.012648		0.098074	-0.002039		0.183974	-0.009403		0.186267	0.012878		-2.2923	0.03598		-2.29737	-0.017266		-2.29664	0.038094
	0.098799	-0.013029		0.098764	-0.002172		0.185265	-0.008579		0.187575	0.013144		-2.29161	-0.009186		-2.29672	-0.016668		-2.296	0.037581
	0.099486	-0.013765		0.099453	-0.002422		0.186556	-0.009647		0.188882	0.014196		-2.29093	-0.031533		-2.29608	-0.015227		-2.29535	0.036949
	0.100173	-0.013984		0.100142	-0.002587		0.187847	-0.010887		0.19019	0.014887		-2.29024	-0.035759		-2.29543	-0.014091		-2.29471	0.036871
	0.100861	-0.013998		0.100832	-0.002099		0.189138	-0.010641		0.191498	0.015326		-2.28956	-0.036866		-2.29479	-0.013214		-2.29407	0.036754
	0.101548	-0.014927		0.101521	-0.002386		0.190429	-0.010803		0.192806	0.015436		-2.28887	-0.037287		-2.29414	-0.012597		-2.29343	0.036217
	0.102236	-0.015871		0.102211	-0.002816		0.19172	-0.011123		0.194114	0.014943		-2.28819	-0.037646		-2.29349	-0.011317		-2.29278	0.035192
	0.102923	-0.016626		0.1029	-0.002605		0.193011	-0.011993		0.195422	0.014701		-2.28751	-0.037558		-2.29285	-0.010247		-2.29214	0.03421
	0.10361	-0.017083		0.10359	-0.002659		0.194303	-0.011746		0.19673	0.01534		-2.28682	-0.037734		-2.2922	-0.008611		-2.2915	0.033979
	0.104298	-0.017856		0.104279	-0.0027		0.195593	-0.011569		0.198038	0.016201		-2.28614	-0.037757		-2.29156	-0.006768		-2.29086	0.033667
	0.104985	-0.018817		0.104968	-0.00244		0.196884	-0.011184		0.199345	0.016805		-2.28546	-0.037835		-2.29091	-0.005523		-2.29021	0.032947
	0.105672	-0.01945		0.105658	-0.002054		0.198175	-0.009539		0.200653	0.017735		-2.28477	-0.038333		-2.29027	-0.00403		-2.28957	0.032297
	0.106359	-0.019421		0.106347	-0.001832		0.199466	-0.008685		0.201961	0.017882		-2.28409	-0.039003		-2.28962	-0.003131		-2.28893	0.031859
	0.107047	-0.01934		0.107036	-0.001747		0.200757	-0.008965		0.203269	0.017884		-2.28341	-0.039111		-2.28897	-0.003437		-2.28829	0.031866
	0.107734	-0.019486		0.107726	-0.001757		0.202048	-0.007681		0.204577	0.017618		-2.28272	-0.039182		-2.28833	-0.003754		-2.28764	0.032417
	0.108422	-0.020138		0.108415	-0.001187		0.20334	-0.007041		0.205885	0.016603		-2.28204	-0.039997		-2.28768	-0.002894		-2.287	0.032323
	0.109109	-0.020898		0.109105	-0.0011		0.20463	-0.005425		0.207193	0.016326		-2.28135	-0.039522		-2.28704	-0.002489		-2.28636	0.031544
	0.109796	-0.021369		0.109794	-0.00145		0.205921	-0.004704		0.208501	0.016147		-2.28067	-0.039666		-2.28639	-0.002086		-2.28572	0.031469
	0.110484	-0.022184		0.110483	-0.001068		0.207212	-0.00377		0.209808	0.015997		-2.27998	-0.039753		-2.28574	-0.001137		-2.28507	0.031373
	0.111171	-0.022984		0.111173	-0.000698		0.208503	-0.003415		0.211116	0.016074		-2.2793	-0.039775		-2.2851	-0.000358		-2.28443	0.031215
	0.111858	-0.024604		0.111862	-0.000284		0.209794	-0.001939		0.212424	0.017182		-2.27862	-0.039778		-2.28445	0.000391		-2.28379	0.031436
	0.112545	-0.026452		0.112551	-0.000113		0.211085	-0.001331		0.213732	0.017		-2.27793	-0.040133		-2.28381	0.00027		-2.28315	0.031571
	0.113233	-0.027803		0.113241	0.000191		0.212377	0.000709		0.21504	0.017177		-2.27725	-0.039973		-2.28316	-0.000366		-2.28251	0.031262
	0.11392	-0.028068		0.11393	-0.000528		0.213667	0.001593		0.216348	0.017533		-2.27657	-0.039965		-2.28252	-0.00132		-2.28186	0.03108
	0.114608	-0.027772		0.11462	-0.000955		0.214958	0.002882		0.217656	0.017609		-2.27588	-0.040318		-2.28187	-0.001699		-2.28122	0.031098
	0.115295	-0.028374		0.115309	-0.000755		0.216249	0.003553		0.218963	0.016517		-2.2752	-0.039939		-2.28122	-0.00145		-2.28058	0.031011
	0.115982	-0.028664		0.115999	-0.000584		0.21754	0.00349		0.220271	0.016483		-2.27451	-0.039227		-2.28058	-0.001995		-2.27994	0.031164
	0.11667	-0.029434		0.116688	-0.00077		0.218831	0.005193		0.221579	0.016275		-2.27383	-0.039149		-2.27993	-0.001837		-2.27929	0.030984
	0.117357	-0.030191		0.117377	-0.000415		0.220122	0.006092		0.222887	0.015873		-2.27315	-0.039732		-2.27929	-0.001276		-2.27865	0.030921
	0.118044	-0.029817		0.118067	0.00023		0.221414	0.006245		0.224195	0.015851		-2.27246	-0.039959		-2.27864	-0.001288		-2.27801	0.030804
	0.118731	-0.028998		0.118756	-0.000118		0.222704	0.006318		0.225503	0.016166		-2.27178	-0.041404		-2.278	-0.001463		-2.27737	0.030086
	0.119419	-0.029173		0.119445	-0.000274		0.223995	0.007798		0.226811	0.015347		-2.27109	-0.041438		-2.27735	-0.001289		-2.27672	0.02975
	0.120106	-0.029222		0.120135	7.6e-05		0.225286	0.008831		0.228119	0.014488		-2.27041	-0.041798		-2.2767	-0.002182		-2.27608	0.029289
	0.120794	-0.028024		0.120824	0.000445		0.226577	0.008845		0.229426	0.013969		-2.26973	-0.042264		-2.27606	-0.002599		-2.27544	0.029231
	0.121481	-0.027728		0.121513	0.000848		0.227868	0.007454		0.230734	0.012972		-2.26904	-0.042115		-2.27541	-0.003114		-2.2748	0.029533
	0.122168	-0.028065		0.122203	0.000863		0.229159	0.007598		0.232042	0.01218		-2.26836	-0.042974		-2.27477	-0.003028		-2.27415	0.029116
	0.122856	-0.027614		0.122892	-0.000926		0.230451	0.006741		0.23335	0.011945		-2.26768	-0.043191		-2.27412	-0.003756		-2.27351	0.028689
	0.123543	-0.02791		0.123582	-0.001657		0.231741	0.007147		0.234658	0.011738		-2.26699	-0.041974		-2.27347	-0.003891		-2.27287	0.028945
	0.12423	-0.028505		0.124271	-0.001683		0.233032	0.006528		0.235966	0.01102		-2.26631	-0.042035		-2.27283	-0.005176		-2.27223	0.02836
	0.124918	-0.029694		0.12496	-0.001488		0.234324	0.004817		0.237274	0.009938		-2.26562	-0.04234		-2.27218	-0.006069		-2.27158	0.027687
	0.125605	-0.029748		0.12565	-0.002647		0.235614	0.004135		0.238582	0.009062		-2.26494	-0.043026		-2.27154	-0.006291		-2.27094	0.027345
	0.126292	-0.030218		0.126339	-0.001928		0.236905	0.003288		0.239889	0.008297		-2.26426	-0.044222		-2.27089	-0.006579		-2.2703	0.027298
	0.12698	-0.030724		0.127028	-0.002601		0.238196	0.002011		0.241197	0.007593		-2.26357	-0.045104		-2.27025	-0.007486		-2.26966	0.027592
	0.127667	-0.030797		0.127718	-0.001674		0.239488	0.001242		0.242505	0.006912		-2.26289	-0.044992		-2.2696	-0.008404		-2.26901	0.027488
	0.128354	-0.031767		0.128407	-0.001215		0.240778	0.000932		0.243813	0.006357		-2.2622	-0.04475		-2.26896	-0.008698		-2.26837	0.027006
	0.129042	-0.032142		0.129097	-0.002412		0.242069	-0.000156		0.245121	0.006406		-2.26152	-0.044775		-2.26831	-0.008984		-2.26773	0.026937
	0.129729	-0.032804		0.129786	-0.003066		0.243361	-0.001035		0.246429	0.006359		-2.26084	-0.045368		-2.26766	-0.010189		-2.26709	0.027062
	0.130416	-0.033249		0.130476	-0.002785		0.244652	-0.000702		0.247737	0.006044		-2.26015	-0.045732		-2.26702	-0.010074		-2.26644	0.02659
	0.131104	-0.033349		0.131165	-0.003075		0.245942	-0.000419		0.249045	0.006187		-2.25947	-0.045535		-2.26637	-0.010299		-2.2658	0.025956
	0.131791	-0.033171		0.131854	-0.002771		0.247233	0.000153		0.250352	0.005507		-2.25879	-0.045347		-2.26573	-0.010758		-2.26516	0.025938
	0.132478	-0.032486		0.132544	-0.003119		0.248525	0.000991		0.25166	0.005096		-2.2581	-0.045002		-2.26508	-0.010696		-2.26452	0.026037
	0.133166	-0.032381		0.133233	-0.003168		0.249815	0.000949		0.252968	0.004857		-2.25742	-0.045337		-2.26443	-0.010783		-2.26388	0.026029
	0.133853	-0.03157		0.133922	-0.003693		0.251106	0.000862		0.254276	0.004491		-2.25673	-0.0461		-2.26379	-0.010876		-2.26323	0.026143
	0.13454	-0.031229		0.134612	-0.003422		0.252398	0.000972		0.255584	0.004476		-2.25605	-0.04618		-2.26314	-0.010139		-2.26259	0.025856
	0.135228	-0.031407		0.135301	-0.003166		0.253689	0.00178		0.256892	0.004456		-2.25537	-0.046012		-2.2625	-0.010687		-2.26195	0.025286
	0.135915	-0.031421		0.135991	-0.003546		0.254979	0.002097		0.2582	0.004008		-2.25468	-0.046072		-2.26185	-0.011522		-2.26131	0.024569
	0.136602	-0.030876		0.13668	-0.003696		0.25627	0.00216		0.259508	0.003369		-2.254	-0.046691		-2.26121	-0.011974		-2.26066	0.024212
	0.13729	-0.030297		0.137369	-0.00378		0.257562	0.003636		0.260815	0.003549		-2.25332	-0.046591		-2.26056	-0.0126		-2.26002	0.024378
	0.137977	-0.029708		0.138059	-0.003417		0.258852	0.006117		0.262123	0.002874		-2.25263	-0.046316		-2.25991	-0.013431		-2.25938	0.02402
	0.138664	-0.029077		0.138748	-0.002895		0.260143	0.008271		0.263431	0.002535		-2.25195	-0.045973		-2.25927	-0.013722		-2.25874	0.023441
	0.139352	-0.02804		0.139437	-0.003416		0.261435	0.0103		0.264739	0.002624		-2.25126	-0.045313		-2.25862	-0.01435		-2.25809	0.023338
	0.140039	-0.027871		0.140127	-0.004112		0.262726	0.012016		0.266047	0.002924		-2.25058	-0.045374		-2.25798	-0.01524		-2.25745	0.022966
	0.140726	-0.028768		0.140816	-0.005088		0.264016	0.013857		0.267355	0.002259		-2.2499	-0.046354		-2.25733	-0.015205		-2.25681	0.022674
	0.141414	-0.029035		0.141505	-0.005473		0.265307	0.016936		0.268663	0.00163		-2.24921	-0.046605		-2.25669	-0.014057		-2.25617	0.022429
	0.142101	-0.028313		0.142195	-0.005738		0.266599	0.020214		0.269971	0.001554		-2.24853	-0.046238		-2.25604	-0.014005		-2.25552	0.02207
	0.142788	-0.028457		0.142884	-0.006711		0.267889	0.022025		0.271278	0.001719		-2.24784	-0.04651		-2.25539	-0.014627		-2.25488	0.023001
	0.143476	-0.028329		0.143574	-0.006713		0.26918	0.024318		0.272586	0.001567		-2.24716	-0.046797		-2.25475	-0.015176		-2.25424	0.023549
	0.144163	-0.028208		0.144263	-0.007252		0.270472	0.027863		0.273894	0.001162		-2.24648	-0.047197		-2.2541	-0.016114		-2.2536	0.02322
	0.14485	-0.027666		0.144953	-0.007393		0.271763	0.030667		0.275202	0.000993		-2.24579	-0.047718		-2.25346	-0.016899		-2.25295	0.022641
	0.145538	-0.027741		0.145642	-0.00703		0.273053	0.032712		0.27651	0.000625		-2.24511	-0.04801		-2.25281	-0.018065		-2.25231	0.021865
	0.146225	-0.027286		0.146331	-0.006487		0.274344	0.035931		0.277818	0.000439		-2.24443	-0.048088		-2.25217	-0.018141		-2.25167	0.021061
	0.146912	-0.026107		0.147021	-0.006193		0.275636	0.039002		0.279126	0.001867		-2.24374	-0.047643		-2.25152	-0.017549		-2.25103	0.020331
	0.1476	-0.025387		0.14771	-0.006415		0.276926	0.04102		0.280434	0.002527		-2.24306	-0.047123		-2.25087	-0.017171		-2.25038	0.019593
	0.148287	-0.024875		0.148399	-0.006483		0.278217	0.043454		0.281741	0.002438		-2.24237	-0.046724		-2.25023	-0.017402		-2.24974	0.018634
	0.148974	-0.024787		0.149089	-0.006474		0.279509	0.04547		0.283049	0.002059		-2.24169	-0.046756		-2.24958	-0.018185		-2.2491	0.018317
	0.149662	-0.024393		0.149778	-0.007012		0.2808	0.046801		0.284357	0.001769		-2.24101	-0.046528		-2.24894	-0.019021		-2.24846	0.018645
	0.150349	-0.02412		0.150468	-0.007385		0.28209	0.048556		0.285665	0.001589		-2.24032	-0.046395		-2.24829	-0.019791		-2.24781	0.018623
	0.151036	-0.02501		0.151157	-0.006912		0.283381	0.050557		0.286973	0.000674		-2.23964	-0.046679		-2.24764	-0.021033		-2.24717	0.018458
	0.151724	-0.023713		0.151846	-0.007854		0.284673	0.053104		0.288281	-9e-06		-2.23895	-0.046757		-2.247	-0.021749		-2.24653	0.017991
	0.152411	-0.023967		0.152536	-0.008885		0.285963	0.055692		0.289589	-0.000491		-2.23827	-0.046682		-2.24635	-0.022051		-2.24589	0.017306
	0.153098	-0.024505		0.153225	-0.009368		0.287254	0.058073		0.290897	-0.001055		-2.23759	-0.046769		-2.24571	-0.022606		-2.24524	0.016516
	0.153786	-0.024936		0.153914	-0.009476		0.288546	0.060162		0.292204	-0.001335		-2.2369	-0.047191		-2.24506	-0.023004		-2.2446	0.015843
	0.154473	-0.02505		0.154604	-0.009991		0.289837	0.060719		0.293512	-0.001198		-2.23622	-0.047165		-2.24442	-0.022712		-2.24396	0.014845
	0.15516	-0.024821		0.155293	-0.009521		0.291127	0.061211		0.29482	-0.000779		-2.23554	-0.047392		-2.24377	-0.022898		-2.24332	0.013861
	0.155848	-0.02597		0.155982	-0.009772		0.292418	0.061516		0.296128	-0.001031		-2.23485	-0.047572		-2.24312	-0.02312		-2.24267	0.012812
	0.156535	-0.026215		0.156672	-0.009517		0.29371	0.062219		0.297436	-0.001446		-2.23417	-0.046999		-2.24248	-0.023978		-2.24203	0.011976
	0.157222	-0.026266		0.157361	-0.008383		0.295001	0.062574		0.298744	-0.000949		-2.23348	-0.046926		-2.24183	-0.024975		-2.24139	0.011542
	0.15791	-0.026013		0.158051	-0.008126		0.296291	0.063407		0.300052	-0.001385		-2.2328	-0.047752		-2.24119	-0.025209		-2.24075	0.010842
	0.158597	-0.025497		0.15874	-0.008039		0.297583	0.063569		0.30136	-0.002266		-2.23212	-0.048281		-2.24054	-0.025499		-2.2401	0.010832
	0.159284	-0.025353		0.15943	-0.008138		0.298874	0.063096		0.302667	-0.002579		-2.23143	-0.048561		-2.2399	-0.025454		-2.23946	0.010249
	0.159972	-0.025672		0.160119	-0.007775		0.300164	0.063731		0.303975	-0.003495		-2.23075	-0.048121		-2.23925	-0.025464		-2.23882	0.009643
	0.160659	-0.02535		0.160808	-0.00788		0.301455	0.064231		0.305283	-0.004412		-2.23007	-0.047791		-2.2386	-0.024999		-2.23818	0.00955
	0.161346	-0.024941		0.161498	-0.00768		0.302747	0.064151		0.306591	-0.00426		-2.22938	-0.048093		-2.23796	-0.024268		-2.23753	0.009226
	0.162034	-0.024608		0.162187	-0.007456		0.304038	0.065267		0.307899	-0.004542		-2.2287	-0.048843		-2.23731	-0.024291		-2.23689	0.008307
	0.162721	-0.023707		0.162876	-0.006927		0.305328	0.064907		0.309207	-0.004763		-2.22801	-0.049445		-2.23667	-0.024968		-2.23625	0.007964
	0.163408	-0.023328		0.163566	-0.00607		0.30662	0.064423		0.310515	-0.004549		-2.22733	-0.049633		-2.23602	-0.025615		-2.23561	0.007746
	0.164096	-0.022814		0.164255	-0.006419		0.307911	0.065592		0.311823	-0.004492		-2.22665	-0.049535		-2.23537	-0.026289		-2.23496	0.006828
	0.164783	-0.021767		0.164945	-0.006593		0.309201	0.065225		0.31313	-0.00401		-2.22596	-0.049828		-2.23473	-0.026606		-2.23432	0.006446
	0.16547	-0.021572		0.165634	-0.005715		0.310493	0.065992		0.314438	-0.005222		-2.22528	-0.050163		-2.23408	-0.026809		-2.23368	0.006651
	0.166158	-0.021962		0.166323	-0.006152		0.311784	0.065256		0.315746	-0.006843		-2.22459	-0.050749		-2.23344	-0.026995		-2.23304	0.00633
	0.166845	-0.021947		0.167013	-0.00609		0.313075	0.066207		0.317054	-0.006579		-2.22391	-0.052111		-2.23279	-0.028191		-2.23239	0.006216
	0.167532	-0.021199		0.167702	-0.006511		0.314365	0.066415		0.318362	-0.007229		-2.22323	-0.052315		-2.23215	-0.027546		-2.23175	0.006586
	0.16822	-0.020789		0.168391	-0.006683		0.315657	0.066332		0.31967	-0.008147		-2.22254	-0.052395		-2.2315	-0.02803		-2.23111	0.006306
	0.168907	-0.020943		0.169081	-0.006492		0.316948	0.064992		0.320978	-0.007972		-2.22186	-0.052847		-2.23086	-0.027828		-2.23047	0.005638
	0.169594	-0.020744		0.16977	-0.006554		0.318238	0.063803		0.322286	-0.007871		-2.22118	-0.053334		-2.23021	-0.027754		-2.22982	0.004902
	0.170282	-0.021242		0.17046	-0.005686		0.31953	0.062357		0.323593	-0.008278		-2.22049	-0.053996		-2.22956	-0.027855		-2.22918	0.005695
	0.170969	-0.021842		0.171149	-0.005801		0.320821	0.062294		0.324901	-0.008108		-2.21981	-0.054225		-2.22892	-0.028216		-2.22854	0.006137
	0.171656	-0.022382		0.171839	-0.00534		0.322112	0.062226		0.326209	-0.007511		-2.21912	-0.054984		-2.22827	-0.027942		-2.2279	0.005717
	0.172344	-0.022932		0.172528	-0.005655		0.323402	0.06287		0.327517	-0.007056		-2.21844	-0.055923		-2.22763	-0.028643		-2.22726	0.005973
	0.173031	-0.023601		0.173217	-0.005893		0.324694	0.062136		0.328825	-0.006437		-2.21776	-0.056866		-2.22698	-0.028726		-2.22661	0.006427
	0.173718	-0.024332		0.173907	-0.00601		0.325985	0.061665		0.330133	-0.007021		-2.21707	-0.057552		-2.22634	-0.028537		-2.22597	0.006458
	0.174406	-0.024445		0.174596	-0.005636		0.327275	0.061978		0.331441	-0.008293		-2.21639	-0.056924		-2.22569	-0.02804		-2.22533	0.006391
	0.175093	-0.024596		0.175285	-0.005452		0.328567	0.060071		0.332748	-0.007906		-2.2157	-0.057223		-2.22504	-0.028527		-2.22469	0.006257
	0.17578	-0.02524		0.175975	-0.005012		0.329858	0.059747		0.334056	-0.008041		-2.21502	-0.056842		-2.2244	-0.029038		-2.22404	0.006456
	0.176468	-0.025235		0.176664	-0.00439		0.331149	0.06023		0.335364	-0.008525		-2.21434	-0.057178		-2.22375	-0.02812		-2.2234	0.007102
	0.177155	-0.025024		0.177353	-0.004126		0.332439	0.059215		0.336672	-0.009389		-2.21365	-0.057952		-2.22311	-0.027854		-2.22276	0.006815
	0.177842	-0.025111		0.178043	-0.003977		0.333731	0.059505		0.33798	-0.009885		-2.21297	-0.058418		-2.22246	-0.026724		-2.22212	0.007023
	0.17853	-0.025404		0.178732	-0.004107		0.335022	0.059775		0.339288	-0.009883		-2.21229	-0.058133		-2.22181	-0.026571		-2.22147	0.007853
	0.179217	-0.025834		0.179422	-0.004723		0.336312	0.058461		0.340596	-0.009684		-2.2116	-0.058574		-2.22117	-0.026226		-2.22083	0.008519
	0.179904	-0.025549		0.180111	-0.005273		0.337604	0.058881		0.341904	-0.009033		-2.21092	-0.058141		-2.22052	-0.025534		-2.22019	0.009548
	0.180592	-0.025519		0.1808	-0.00633		0.338895	0.057736		0.343211	-0.00906		-2.21023	-0.0583		-2.21988	-0.025207		-2.21955	0.010346
	0.181279	-0.025723		0.18149	-0.006717		0.340186	0.056141		0.344519	-0.009509		-2.20955	-0.058757		-2.21923	-0.023876		-2.2189	0.011316
	0.181966	-0.025768		0.182179	-0.006649		0.341476	0.056079		0.345827	-0.010295		-2.20887	-0.059608		-2.21859	-0.021665		-2.21826	0.013204
	0.182654	-0.025949		0.182868	-0.00638		0.342768	0.055538		0.347135	-0.010242		-2.20818	-0.060262		-2.21794	-0.018918		-2.21762	0.015497
	0.183341	-0.025855		0.183558	-0.007222		0.344059	0.055668		0.348443	-0.010092		-2.2075	-0.060023		-2.21729	-0.015358		-2.21698	0.017134
	0.184028	-0.025955		0.184247	-0.007469		0.34535	0.055422		0.349751	-0.010583		-2.20681	-0.061463		-2.21665	-0.011994		-2.21633	0.018441
	0.184716	-0.025684		0.184937	-0.007654		0.346641	0.053951		0.351059	-0.010518		-2.20613	-0.062095		-2.216	-0.007161		-2.21569	0.020912
	0.185403	-0.025352		0.185626	-0.008011		0.347932	0.053163		0.352367	-0.00976		-2.20545	-0.062813		-2.21536	-0.000996		-2.21505	0.024945
	0.18609	-0.025476		0.186316	-0.007982		0.349223	0.052349		0.353674	-0.010886		-2.20476	-0.063303		-2.21471	0.005269		-2.21441	0.030932
	0.186778	-0.025918		0.187005	-0.00816		0.350513	0.052808		0.354982	-0.009402		-2.20408	-0.063503		-2.21407	0.012921		-2.21376	0.038108
	0.187465	-0.026227		0.187694	-0.008293		0.351805	0.052622		0.35629	-0.009395		-2.20339	-0.063032		-2.21342	0.023579		-2.21312	0.046248
	0.188152	-0.025924		0.188384	-0.007667		0.353096	0.051879		0.357598	-0.009828		-2.20271	-0.063266		-2.21277	0.036952		-2.21248	0.055533
	0.18884	-0.026514		0.189073	-0.007413		0.354387	0.050565		0.358906	-0.011541		-2.20203	-0.063248		-2.21213	0.053836		-2.21184	0.065401
	0.189527	-0.026837		0.189762	-0.007654		0.355678	0.049964		0.360214	-0.01336		-2.20134	-0.063424		-2.21148	0.074114		-2.2112	0.076352
	0.190214	-0.025735		0.190452	-0.008487		0.356969	0.050673		0.361522	-0.012739		-2.20066	-0.064421		-2.21084	0.097839		-2.21055	0.088452
	0.190902	-0.025215		0.191141	-0.008337		0.35826	0.050025		0.36283	-0.013288		-2.19998	-0.064424		-2.21019	0.124769		-2.20991	0.100923
	0.191589	-0.025382		0.191831	-0.008299		0.35955	0.049484		0.364137	-0.012332		-2.19929	-0.064043		-2.20954	0.153835		-2.20927	0.114887
	0.192276	-0.024979		0.19252	-0.007995		0.360842	0.049418		0.365445	-0.012046		-2.19861	-0.063595		-2.2089	0.185625		-2.20863	0.12988
	0.192964	-0.024784		0.193209	-0.007909		0.362133	0.049495		0.366753	-0.01252		-2.19792	-0.063099		-2.20825	0.219931		-2.20798	0.146159
	0.193651	-0.024814		0.193899	-0.007932		0.363424	0.048693		0.368061	-0.013081		-2.19724	-0.063408		-2.20761	0.25739		-2.20734	0.164173
	0.194338	-0.02386		0.194588	-0.00743		0.364715	0.048632		0.369369	-0.012591		-2.19656	-0.063991		-2.20696	0.296522		-2.2067	0.183695
	0.195026	-0.023829		0.195277	-0.007366		0.366006	0.048316		0.370677	-0.012003		-2.19587	-0.064752		-2.20632	0.336484		-2.20606	0.204246
	0.195713	-0.024506		0.195967	-0.007761		0.367297	0.048017		0.371985	-0.011861		-2.19519	-0.065218		-2.20567	0.377854		-2.20541	0.226472
	0.1964	-0.025003		0.196656	-0.007839		0.368587	0.047983		0.373293	-0.012458		-2.1945	-0.064616		-2.20502	0.42194		-2.20477	0.250114
	0.197088	-0.025535		0.197345	-0.00791		0.369879	0.047994		0.3746	-0.013214		-2.19382	-0.063942		-2.20438	0.469704		-2.20413	0.274906
	0.197775	-0.024629		0.198035	-0.007678		0.37117	0.047927		0.375908	-0.013363		-2.19314	-0.063732		-2.20373	0.520441		-2.20349	0.301382
	0.198462	-0.024605		0.198724	-0.006835		0.372461	0.048071		0.377216	-0.01344		-2.19245	-0.063605		-2.20309	0.572877		-2.20284	0.329525
	0.19915	-0.026188		0.199414	-0.006916		0.373752	0.046602		0.378524	-0.013101		-2.19177	-0.063788		-2.20244	0.626379		-2.2022	0.359184
	0.199837	-0.026511		0.200103	-0.0068		0.375043	0.045467		0.379832	-0.013669		-2.19109	-0.063611		-2.2018	0.681974		-2.20156	0.389683
	0.200524	-0.026123		0.200793	-0.006732		0.376334	0.044393		0.38114	-0.013498		-2.1904	-0.062365		-2.20115	0.740512		-2.20092	0.421863
	0.201212	-0.026663		0.201482	-0.006748		0.377625	0.043508		0.382448	-0.013324		-2.18972	-0.061039		-2.2005	0.801126		-2.20027	0.454769
	0.201899	-0.027836		0.202171	-0.006528		0.378916	0.043695		0.383756	-0.013156		-2.18903	-0.060815		-2.19986	0.864089		-2.19963	0.489455
	0.202586	-0.029136		0.202861	-0.00533		0.380207	0.044013		0.385063	-0.012361		-2.18835	-0.061464		-2.19921	0.930563		-2.19899	0.526284
	0.203274	-0.029647		0.20355	-0.00605		0.381498	0.044285		0.386371	-0.011869		-2.18767	-0.061845		-2.19857	1.00055		-2.19835	0.564724
	0.203961	-0.030377		0.204239	-0.006824		0.382789	0.043996		0.387679	-0.012422		-2.18698	-0.060696		-2.19792	1.07455		-2.1977	0.604218
	0.204648	-0.030156		0.204929	-0.007197		0.38408	0.043598		0.388987	-0.012005		-2.1863	-0.060129		-2.19727	1.15133		-2.19706	0.644714
	0.205336	-0.029949		0.205618	-0.007204		0.385371	0.044053		0.390295	-0.011284		-2.18561	-0.05983		-2.19663	1.23151		-2.19642	0.687553
	0.206023	-0.029574		0.206308	-0.007304		0.386662	0.044425		0.391603	-0.010214		-2.18493	-0.060383		-2.19598	1.3169		-2.19578	0.731638
	0.20671	-0.02949		0.206997	-0.007207		0.387953	0.044513		0.392911	-0.010035		-2.18425	-0.059776		-2.19534	1.40671		-2.19513	0.776505
	0.207398	-0.029156		0.207686	-0.00736		0.389244	0.043216		0.394219	-0.010178		-2.18356	-0.059113		-2.19469	1.50055		-2.19449	0.823542
	0.208085	-0.029287		0.208376	-0.007639		0.390535	0.043544		0.395526	-0.010828		-2.18288	-0.058339		-2.19405	1.59847		-2.19385	0.872855
	0.208772	-0.029301		0.209065	-0.007899		0.391826	0.042592		0.396834	-0.011746		-2.1822	-0.057705		-2.1934	1.70138		-2.19321	0.923416
	0.20946	-0.029627		0.209754	-0.007883		0.393117	0.04276		0.398142	-0.01184		-2.18151	-0.057412		-2.19276	1.80855		-2.19256	0.975681
	0.210147	-0.029349		0.210444	-0.008156		0.394408	0.042765		0.39945	-0.011613		-2.18083	-0.056398		-2.19211	1.91962		-2.19192	1.02885
	0.210835	-0.029699		0.211133	-0.008984		0.3957	0.043088		0.400758	-0.011099		-2.18014	-0.055889		-2.19146	2.03595		-2.19128	1.08357
	0.211522	-0.029861		0.211823	-0.009447		0.39699	0.042548		0.402066	-0.01106		-2.17946	-0.054998		-2.19082	2.15561		-2.19064	1.13915
	0.212209	-0.029861		0.212512	-0.009123		0.398281	0.04161		0.403374	-0.010907		-2.17878	-0.054382		-2.19017	2.28024		-2.19	1.19246
	0.212896	-0.029911		0.213201	-0.008656		0.399572	0.041008		0.404682	-0.010853		-2.17809	-0.054139		-2.18953	2.4102		-2.18935	1.24426
	0.213584	-0.02974		0.213891	-0.008357		0.400863	0.04038		0.405989	-0.010577		-2.17741	-0.053144		-2.18888	2.54407		-2.18871	1.29696
	0.214271	-0.030342		0.21458	-0.008286		0.402154	0.039603		0.407297	-0.010727		-2.17672	-0.052332		-2.18824	2.68071		-2.18807	1.35389
	0.214958	-0.030647		0.21527	-0.007751		0.403445	0.039375		0.408605	-0.011031		-2.17604	-0.05141		-2.18759	2.82042		-2.18743	1.41597
	0.215646	-0.030493		0.215959	-0.007008		0.404737	0.039039		0.409913	-0.011171		-2.17536	-0.04971		-2.18694	2.96229		-2.18678	1.48047
	0.216333	-0.030605		0.216648	-0.00671		0.406027	0.039938		0.411221	-0.011779		-2.17467	-0.047789		-2.1863	3.10784		-2.18614	1.54649
	0.217021	-0.030536		0.217338	-0.006328		0.407318	0.040732		0.412529	-0.012184		-2.17399	-0.04486		-2.18565	3.25372		-2.1855	1.61359
	0.217708	-0.030387		0.218027	-0.00626		0.408609	0.041184		0.413837	-0.01219		-2.17331	-0.042332		-2.18501	3.40396		-2.18486	1.68187
	0.218395	-0.030735		0.218716	-0.005373		0.4099	0.040642		0.415145	-0.011652		-2.17262	-0.039762		-2.18436	3.55641		-2.18421	1.75147
	0.219082	-0.030933		0.219406	-0.004601		0.411191	0.040338		0.416452	-0.012359		-2.17194	-0.036775		-2.18371	3.70932		-2.18357	1.81923
	0.21977	-0.031551		0.220095	-0.002876		0.412482	0.0403		0.41776	-0.012452		-2.17125	-0.032189		-2.18307	3.86327		-2.18293	1.88731
	0.220457	-0.032519		0.220785	-0.000859		0.413774	0.040412		0.419068	-0.012377		-2.17057	-0.027397		-2.18242	4.01895		-2.18229	1.95407
	0.221144	-0.032984		0.221474	0.000499		0.415064	0.040304		0.420376	-0.012353		-2.16989	-0.022608		-2.18178	4.17273		-2.18164	2.01982
	0.221832	-0.033136		0.222163	0.002149		0.416355	0.040293		0.421684	-0.011789		-2.1692	-0.018012		-2.18113	4.32465		-2.181	2.08388
	0.222519	-0.033531		0.222853	0.002876		0.417646	0.040874		0.422992	-0.012865		-2.16852	-0.012425		-2.18049	4.47483		-2.18036	2.14704
	0.223207	-0.034196		0.223542	0.004147		0.418937	0.040861		0.4243	-0.012992		-2.16784	-0.006405		-2.17984	4.62208		-2.17972	2.20873
	0.223894	-0.034328		0.224231	0.005296		0.420228	0.040653		0.425608	-0.013174		-2.16715	-0.000616		-2.17919	4.76571		-2.17907	2.26932
	0.224581	-0.035083		0.224921	0.008566		0.421519	0.040336		0.426915	-0.013014		-2.16647	0.005552		-2.17855	4.90561		-2.17843	2.32837
	0.225268	-0.035337		0.22561	0.010058		0.422811	0.040736		0.428223	-0.011713		-2.16578	0.011469		-2.1779	5.04296		-2.17779	2.38751
	0.225956	-0.034822		0.2263	0.011666		0.424101	0.040492		0.429531	-0.010843		-2.1651	0.017779		-2.17726	5.17526		-2.17715	2.44535
	0.226643	-0.034901		0.226989	0.013835		0.425392	0.039493		0.430839	-0.010963		-2.16442	0.024749		-2.17661	5.30453		-2.1765	2.50065
	0.22733	-0.035325		0.227679	0.016311		0.426683	0.039		0.432147	-0.009867		-2.16373	0.031795		-2.17597	5.42823		-2.17586	2.5542
	0.228018	-0.035578		0.228368	0.01963		0.427974	0.038939		0.433455	-0.008962		-2.16305	0.039689		-2.17532	5.54453		-2.17522	2.60694
	0.228705	-0.03616		0.229057	0.022059		0.429265	0.038702		0.434763	-0.00741		-2.16236	0.04812		-2.17467	5.6556		-2.17458	2.65622
	0.229393	-0.03611		0.229747	0.026241		0.430556	0.038562		0.436071	-0.006082		-2.16168	0.057352		-2.17403	5.76092		-2.17393	2.70456
	0.23008	-0.035887		0.230436	0.030806		0.431848	0.039214		0.437378	-0.003008		-2.161	0.066849		-2.17338	5.86188		-2.17329	2.74973
	0.230767	-0.036144		0.231125	0.033494		0.433138	0.039751		0.438686	-0.001422		-2.16031	0.075569		-2.17274	5.95865		-2.17265	2.79398
	0.231454	-0.037156		0.231815	0.038606		0.434429	0.039038		0.439994	-0.000168		-2.15963	0.085088		-2.17209	6.05157		-2.17201	2.83665
	0.232142	-0.037961		0.232504	0.043739		0.43572	0.038601		0.441302	0.00187		-2.15895	0.094331		-2.17144	6.13907		-2.17136	2.87598
	0.232829	-0.037815		0.233193	0.048179		0.437012	0.0378		0.44261	0.004794		-2.15826	0.104716		-2.1708	6.22293		-2.17072	2.91435
	0.233516	-0.037255		0.233883	0.053986		0.438302	0.036927		0.443918	0.008171		-2.15758	0.116635		-2.17015	6.3031		-2.17008	2.94977
	0.234204	-0.036982		0.234572	0.058934		0.439593	0.03541		0.445226	0.011113		-2.15689	0.126491		-2.16951	6.37845		-2.16944	2.98348
	0.234891	-0.036681		0.235262	0.06531		0.440885	0.035688		0.446533	0.012781		-2.15621	0.136637		-2.16886	6.44875		-2.16879	3.01548
	0.235579	-0.035828		0.235951	0.07149		0.442175	0.036762		0.447841	0.01404		-2.15553	0.147873		-2.16822	6.51381		-2.16815	3.0455
	0.236266	-0.035073		0.23664	0.078356		0.443466	0.038465		0.449149	0.017153		-2.15484	0.15978		-2.16757	6.57288		-2.16751	3.07139
	0.236953	-0.035222		0.23733	0.084293		0.444757	0.038211		0.450457	0.019626		-2.15416	0.171525		-2.16692	6.6261		-2.16687	3.09485
	0.23764	-0.034787		0.238019	0.092615		0.446049	0.037995		0.451765	0.022762		-2.15347	0.182193		-2.16628	6.67226		-2.16622	3.11675
	0.238328	-0.03479		0.238708	0.09984		0.447339	0.038619		0.453073	0.025052		-2.15279	0.193748		-2.16563	6.71211		-2.16558	3.13542
	0.239015	-0.035198		0.239398	0.107452		0.44863	0.0383		0.454381	0.027936		-2.15211	0.206534		-2.16499	6.74539		-2.16494	3.15291
	0.239702	-0.035468		0.240087	0.114864		0.449922	0.037666		0.455689	0.031036		-2.15142	0.219179		-2.16434	6.77121		-2.1643	3.16744
	0.24039	-0.034863		0.240777	0.122563		0.451212	0.03694		0.456996	0.034547		-2.15074	0.231723		-2.1637	6.79082		-2.16365	3.17963
	0.241077	-0.034293		0.241466	0.130945		0.452503	0.03651		0.458304	0.038467		-2.15006	0.243886		-2.16305	6.80442		-2.16301	3.18989
	0.241765	-0.034237		0.242156	0.13923		0.453794	0.035792		0.459612	0.041122		-2.14937	0.256675		-2.16241	6.81144		-2.16237	3.19842
	0.242452	-0.03433		0.242845	0.148063		0.455086	0.035976		0.46092	0.043139		-2.14869	0.269877		-2.16176	6.81241		-2.16173	3.20269
	0.243139	-0.034182		0.243534	0.156991		0.456376	0.035578		0.462228	0.0462		-2.148	0.283709		-2.16111	6.80828		-2.16108	3.20528
	0.243826	-0.034033		0.244224	0.165261		0.457667	0.035426		0.463536	0.049325		-2.14732	0.2972		-2.16047	6.79837		-2.16044	3.20567
	0.244514	-0.033438		0.244913	0.174176		0.458959	0.034894		0.464844	0.051423		-2.14664	0.30988		-2.15982	6.78204		-2.1598	3.20434
	0.245201	-0.032547		0.245602	0.183113		0.460249	0.034093		0.466152	0.052834		-2.14595	0.323374		-2.15918	6.75837		-2.15916	3.20122
	0.245888	-0.032015		0.246292	0.192472		0.46154	0.034082		0.467459	0.054868		-2.14527	0.336828		-2.15853	6.72926		-2.15851	3.19552
	0.246576	-0.031928		0.246981	0.201551		0.462831	0.034257		0.468767	0.055915		-2.14459	0.349553		-2.15788	6.69447		-2.15787	3.18775
	0.247263	-0.031611		0.247671	0.211577		0.464123	0.032803		0.470075	0.056041		-2.1439	0.36095		-2.15724	6.6543		-2.15723	3.17756
	0.247951	-0.030526		0.24836	0.221636		0.465413	0.03298		0.471383	0.057339		-2.14322	0.373437		-2.15659	6.60767		-2.15659	3.16483
	0.248638	-0.030086		0.249049	0.231137		0.466704	0.034905		0.472691	0.059167		-2.14253	0.386598		-2.15595	6.55637		-2.15595	3.15061
	0.249325	-0.02992		0.249739	0.240279		0.467996	0.034598		0.473999	0.060502		-2.14185	0.398712		-2.1553	6.50137		-2.1553	3.1348
	0.250012	-0.029493		0.250428	0.249717		0.469286	0.034405		0.475307	0.061174		-2.14117	0.410283		-2.15465	6.44189		-2.15466	3.11621
	0.2507	-0.028691		0.251117	0.258591		0.470577	0.034837		0.476615	0.061136		-2.14048	0.422357		-2.15401	6.37923		-2.15402	3.09696
	0.251387	-0.027911		0.251807	0.267548		0.471869	0.036063		0.477922	0.061488		-2.1398	0.434138		-2.15336	6.31554		-2.15338	3.07565
	0.252074	-0.026946		0.252496	0.276193		0.47316	0.036154		0.47923	0.063302		-2.13911	0.445729		-2.15272	6.25351		-2.15273	3.0522
	0.252762	-0.025489		0.253186	0.283916		0.47445	0.036088		0.480538	0.064875		-2.13843	0.45761		-2.15207	6.18825		-2.15209	3.02729
	0.253449	-0.024203		0.253875	0.292002		0.475741	0.034224		0.481846	0.065073		-2.13775	0.468884		-2.15143	6.11682		-2.15145	3.00201
	0.254137	-0.022235		0.254564	0.299119		0.477033	0.034385		0.483154	0.065688		-2.13706	0.478623		-2.15078	6.03893		-2.15081	2.97522
	0.254824	-0.020255		0.255254	0.307131		0.478323	0.034479		0.484462	0.066488		-2.13638	0.488545		-2.15014	5.95591		-2.15016	2.94703
	0.255511	-0.018554		0.255943	0.315355		0.479614	0.034182		0.48577	0.067175		-2.1357	0.49856		-2.14949	5.8712		-2.14952	2.91791
	0.256198	-0.01659		0.256633	0.324339		0.480906	0.033984		0.487078	0.0674		-2.13501	0.508286		-2.14884	5.78464		-2.14888	2.88872
	0.256886	-0.014536		0.257322	0.331747		0.482197	0.033404		0.488385	0.067419		-2.13433	0.51698		-2.1482	5.69597		-2.14824	2.85818
	0.257573	-0.013035		0.258011	0.340347		0.483487	0.032158		0.489693	0.067046		-2.13364	0.526151		-2.14755	5.60609		-2.14759	2.8282
	0.25826	-0.011612		0.258701	0.348668		0.484778	0.031821		0.491001	0.066698		-2.13296	0.535088		-2.14691	5.51623		-2.14695	2.79708
	0.258948	-0.010301		0.25939	0.355828		0.48607	0.031595		0.492309	0.066608		-2.13228	0.543176		-2.14626	5.42705		-2.14631	2.76578
	0.259635	-0.009007		0.260079	0.364736		0.487361	0.030392		0.493617	0.066952		-2.13159	0.550739		-2.14561	5.33868		-2.14567	2.73425
	0.260323	-0.007628		0.260769	0.371825		0.488651	0.031008		0.494925	0.066187		-2.13091	0.558114		-2.14497	5.25295		-2.14502	2.70251
	0.26101	-0.006545		0.261458	0.379283		0.489943	0.031875		0.496233	0.064967		-2.13022	0.565274		-2.14432	5.16785		-2.14438	2.67103
	0.261697	-0.004806		0.262148	0.386495		0.491234	0.032834		0.497541	0.064973		-2.12954	0.571443		-2.14368	5.08549		-2.14374	2.63928
	0.262384	-0.003033		0.262837	0.392969		0.492524	0.034201		0.498848	0.065042		-2.12886	0.577066		-2.14303	5.00403		-2.1431	2.60703
	0.263072	-0.000826		0.263526	0.39952		0.493815	0.034499		0.500156	0.064742		-2.12817	0.583021		-2.14239	4.92398		-2.14245	2.5759
	0.263759	0.001025		0.264216	0.405459		0.495107	0.033866		0.501464	0.065128		-2.12749	0.588576		-2.14174	4.84461		-2.14181	2.54458
	0.264446	0.003131		0.264905	0.411143		0.496398	0.034193		0.502772	0.06528		-2.12681	0.593378		-2.14109	4.76824		-2.14117	2.51432
	0.265134	0.00507		0.265594	0.417751		0.497688	0.034151		0.50408	0.065485		-2.12612	0.598071		-2.14045	4.69309		-2.14053	2.48485
	0.265821	0.007659		0.266284	0.422245		0.49898	0.033936		0.505388	0.065139		-2.12544	0.602662		-2.1398	4.62035		-2.13989	2.45583
	0.266509	0.009822		0.266973	0.426673		0.500271	0.033415		0.506696	0.063155		-2.12475	0.607049		-2.13916	4.55076		-2.13924	2.42687
	0.267196	0.011496		0.267663	0.431708		0.501561	0.033537		0.508004	0.06196		-2.12407	0.609956		-2.13851	4.48187		-2.1386	2.39804
	0.267883	0.012179		0.268352	0.436586		0.502852	0.03346		0.509311	0.061449		-2.12339	0.612799		-2.13787	4.41408		-2.13796	2.36941
	0.26857	0.013496		0.269041	0.440605		0.504144	0.033953		0.510619	0.060071		-2.1227	0.615569		-2.13722	4.34776		-2.13732	2.34172
	0.269258	0.014879		0.269731	0.445345		0.505435	0.03276		0.511927	0.058888		-2.12202	0.61784		-2.13657	4.28425		-2.13667	2.31556
	0.269945	0.016043		0.27042	0.44953		0.506725	0.03103		0.513235	0.059595		-2.12133	0.620558		-2.13593	4.22185		-2.13603	2.29104
	0.270633	0.016812		0.27111	0.45299		0.508017	0.030656		0.514543	0.059487		-2.12065	0.623491		-2.13528	4.16268		-2.13539	2.26835
	0.27132	0.019339		0.271799	0.456246		0.509308	0.030412		0.515851	0.058768		-2.11997	0.625888		-2.13464	4.10527		-2.13475	2.24513
	0.272007	0.020075		0.272488	0.458873		0.510598	0.030334		0.517159	0.057417		-2.11928	0.628164		-2.13399	4.05044		-2.1341	2.2204
	0.272695	0.022087		0.273178	0.461152		0.511889	0.030029		0.518467	0.055747		-2.1186	0.630341		-2.13334	3.99775		-2.13346	2.19805
	0.273382	0.023764		0.273867	0.463027		0.513181	0.029441		0.519774	0.053979		-2.11791	0.63169		-2.1327	3.94721		-2.13282	2.17387
	0.274069	0.025464		0.274556	0.465408		0.514472	0.030216		0.521082	0.052935		-2.11723	0.633456		-2.13205	3.89755		-2.13218	2.15094
	0.274756	0.026887		0.275246	0.467705		0.515762	0.031661		0.52239	0.052573		-2.11655	0.634272		-2.13141	3.84935		-2.13153	2.1292
	0.275444	0.027971		0.275935	0.469463		0.517054	0.032289		0.523698	0.05278		-2.11586	0.635131		-2.13076	3.80367		-2.13089	2.10673
	0.276131	0.029415		0.276625	0.471545		0.518345	0.032611		0.525006	0.053292		-2.11518	0.635799		-2.13012	3.75919		-2.13025	2.08429
	0.276819	0.03163		0.277314	0.47382		0.519635	0.03304		0.526314	0.052846		-2.1145	0.636432		-2.12947	3.71591		-2.12961	2.06341
	0.277506	0.032747		0.278003	0.475515		0.520926	0.032159		0.527622	0.052378		-2.11381	0.636178		-2.12882	3.67283		-2.12896	2.04323
	0.278193	0.035067		0.278693	0.476801		0.522218	0.031639		0.52893	0.051802		-2.11313	0.635386		-2.12818	3.63089		-2.12832	2.02442
	0.278881	0.036003		0.279382	0.477917		0.523509	0.031377		0.530237	0.050687		-2.11244	0.634659		-2.12753	3.59119		-2.12768	2.00525
	0.279568	0.037479		0.280071	0.479459		0.524799	0.031864		0.531545	0.050155		-2.11176	0.633813		-2.12689	3.55367		-2.12704	1.98572
	0.280255	0.03899		0.280761	0.480095		0.526091	0.032306		0.532853	0.050358		-2.11108	0.632543		-2.12624	3.51705		-2.12639	1.96592
	0.280942	0.040561		0.28145	0.479743		0.527382	0.031722		0.534161	0.050198		-2.11039	0.632059		-2.1256	3.48102		-2.12575	1.94743
	0.28163	0.041294		0.28214	0.479134		0.528673	0.031171		0.535469	0.049576		-2.10971	0.631931		-2.12495	3.44657		-2.12511	1.92892
	0.282317	0.042005		0.282829	0.478982		0.529963	0.030872		0.536777	0.048635		-2.10902	0.630733		-2.12431	3.4132		-2.12447	1.91237
	0.283005	0.044232		0.283519	0.479788		0.531255	0.030496		0.538085	0.047849		-2.10834	0.629617		-2.12366	3.38072		-2.12382	1.89557
	0.283692	0.046174		0.284208	0.47998		0.532546	0.030701		0.539393	0.048867		-2.10766	0.628872		-2.12301	3.34828		-2.12318	1.87856
	0.284379	0.047209		0.284897	0.48002		0.533836	0.031136		0.5407	0.050347		-2.10697	0.627648		-2.12237	3.31663		-2.12254	1.86264
	0.285067	0.047871		0.285587	0.479991		0.535128	0.030438		0.542008	0.051112		-2.10629	0.625236		-2.12172	3.28516		-2.1219	1.84592
	0.285754	0.048666		0.286276	0.479178		0.536419	0.029228		0.543316	0.052213		-2.10561	0.622848		-2.12108	3.25396		-2.12125	1.8283
	0.286441	0.049335		0.286965	0.479031		0.53771	0.029525		0.544624	0.052945		-2.10492	0.620995		-2.12043	3.22468		-2.12061	1.81198
	0.287128	0.049499		0.287655	0.47935		0.539001	0.029529		0.545932	0.051834		-2.10424	0.61891		-2.11978	3.19644		-2.11997	1.79697
	0.287816	0.049744		0.288344	0.479204		0.540292	0.029152		0.54724	0.050907		-2.10355	0.617275		-2.11914	3.16941		-2.11933	1.78184
	0.288503	0.048947		0.289033	0.478696		0.541583	0.029164		0.548548	0.049662		-2.10287	0.615796		-2.11849	3.14348		-2.11869	1.76749
	0.289191	0.048774		0.289723	0.478422		0.542873	0.029502		0.549856	0.049359		-2.10219	0.613337		-2.11785	3.11776		-2.11804	1.75221
	0.289878	0.048772		0.290412	0.477579		0.544165	0.029658		0.551163	0.051079		-2.1015	0.610411		-2.1172	3.09076		-2.1174	1.73795
	0.290565	0.048447		0.291102	0.476932		0.545456	0.029021		0.552471	0.052597		-2.10082	0.608105		-2.11655	3.06556		-2.11676	1.72304
	0.291253	0.048491		0.291791	0.476623		0.546747	0.028318		0.553779	0.053745		-2.10013	0.605522		-2.11591	3.04047		-2.11612	1.70957
	0.29194	0.049415		0.29248	0.475161		0.548038	0.027722		0.555087	0.052998		-2.09945	0.602591		-2.11526	3.01655		-2.11547	1.6952
	0.292627	0.049927		0.29317	0.473935		0.549329	0.027709		0.556395	0.051186		-2.09877	0.600262		-2.11462	2.99273		-2.11483	1.68071
	0.293314	0.050413		0.293859	0.472982		0.55062	0.027392		0.557703	0.049767		-2.09808	0.598545		-2.11397	2.96936		-2.11419	1.66805
	0.294002	0.05065		0.294549	0.472458		0.55191	0.027152		0.559011	0.049185		-2.0974	0.596269		-2.11333	2.94538		-2.11354	1.65402
	0.294689	0.050718		0.295238	0.47192		0.553202	0.027197		0.560318	0.048186		-2.09672	0.593949		-2.11268	2.92296		-2.1129	1.64085
	0.295377	0.051328		0.295927	0.470889		0.554493	0.026574		0.561626	0.047789		-2.09603	0.591682		-2.11204	2.90089		-2.11226	1.62793
	0.296064	0.051565		0.296617	0.470383		0.555784	0.025853		0.562934	0.04773		-2.09535	0.589897		-2.11139	2.88053		-2.11162	1.61539
	0.296751	0.051031		0.297306	0.469875		0.557075	0.024769		0.564242	0.047473		-2.09466	0.587822		-2.11074	2.86051		-2.11097	1.60351
	0.297439	0.050525		0.297996	0.468597		0.558366	0.024882		0.56555	0.046405		-2.09398	0.585465		-2.1101	2.84227		-2.11033	1.59257
	0.298126	0.049763		0.298685	0.467226		0.559657	0.024774		0.566858	0.046215		-2.0933	0.58241		-2.10945	2.82457		-2.10969	1.58094
	0.298813	0.049398		0.299374	0.465665		0.560947	0.023624		0.568166	0.046736		-2.09261	0.579505		-2.10881	2.80635		-2.10905	1.57044
	0.2995	0.0493		0.300064	0.464596		0.562239	0.02315		0.569474	0.046538		-2.09193	0.577063		-2.10816	2.78819		-2.10841	1.55864
	0.300188	0.04868		0.300753	0.463972		0.56353	0.023226		0.570781	0.046296		-2.09124	0.574421		-2.10751	2.76994		-2.10776	1.54641
	0.300875	0.04806		0.301442	0.46214		0.564821	0.023396		0.572089	0.04449		-2.09056	0.572772		-2.10687	2.75236		-2.10712	1.53496
	0.301563	0.048312		0.302132	0.460029		0.566112	0.023389		0.573397	0.043468		-2.08988	0.571176		-2.10622	2.73468		-2.10648	1.52377
	0.30225	0.048738		0.302821	0.458192		0.567403	0.024113		0.574705	0.043247		-2.08919	0.568508		-2.10558	2.71771		-2.10584	1.51293
	0.302937	0.04949		0.303511	0.456546		0.568694	0.023722		0.576013	0.042278		-2.08851	0.566283		-2.10493	2.70119		-2.10519	1.50259
	0.303625	0.049542		0.3042	0.455111		0.569984	0.023529		0.577321	0.041316		-2.08783	0.565075		-2.10429	2.68504		-2.10455	1.49168
	0.304312	0.049579		0.304889	0.453427		0.571276	0.024991		0.578629	0.041096		-2.08714	0.562657		-2.10364	2.66867		-2.10391	1.48186
	0.304999	0.050012		0.305579	0.451514		0.572567	0.025499		0.579937	0.041369		-2.08646	0.55963		-2.10299	2.65206		-2.10327	1.47176
	0.305686	0.049516		0.306268	0.450087		0.573858	0.025089		0.581244	0.041261		-2.08577	0.557584		-2.10235	2.63583		-2.10262	1.46219
	0.306374	0.048942		0.306957	0.449212		0.575149	0.023822		0.582552	0.041803		-2.08509	0.554267		-2.1017	2.62021		-2.10198	1.45119
	0.307061	0.04884		0.307647	0.44834		0.57644	0.024908		0.58386	0.039881		-2.08441	0.551242		-2.10106	2.60481		-2.10134	1.44011
	0.307749	0.049117		0.308336	0.447229		0.577731	0.025785		0.585168	0.038474		-2.08372	0.548009		-2.10041	2.59025		-2.1007	1.43035
	0.308436	0.049523		0.309026	0.44666		0.579022	0.02553		0.586476	0.036879		-2.08304	0.544928		-2.09977	2.57615		-2.10005	1.42087
	0.309123	0.049038		0.309715	0.445685		0.580313	0.026635		0.587784	0.037163		-2.08236	0.541273		-2.09912	2.56301		-2.09941	1.41041
	0.309811	0.04898		0.310404	0.444247		0.581604	0.025357		0.589092	0.037202		-2.08167	0.538905		-2.09847	2.54993		-2.09877	1.40169
	0.310498	0.049487		0.311094	0.441534		0.582895	0.025324		0.5904	0.036863		-2.08099	0.53582		-2.09783	2.53514		-2.09813	1.3924
	0.311185	0.049186		0.311783	0.439031		0.584186	0.025225		0.591707	0.036917		-2.0803	0.532862		-2.09718	2.52144		-2.09748	1.38382
	0.311872	0.048952		0.312473	0.437376		0.585477	0.024503		0.593015	0.037909		-2.07962	0.529854		-2.09654	2.50759		-2.09684	1.37515
	0.31256	0.048196		0.313162	0.435537		0.586768	0.024908		0.594323	0.039125		-2.07894	0.527054		-2.09589	2.49418		-2.0962	1.36485
	0.313247	0.047288		0.313851	0.434868		0.588059	0.024365		0.595631	0.040017		-2.07825	0.524938		-2.09524	2.48061		-2.09556	1.35485
	0.313935	0.046127		0.314541	0.433445		0.58935	0.025327		0.596939	0.039714		-2.07757	0.521571		-2.0946	2.46632		-2.09491	1.34532
	0.314622	0.045173		0.31523	0.432129		0.590641	0.025042		0.598247	0.038892		-2.07688	0.518303		-2.09395	2.45273		-2.09427	1.33633
	0.315309	0.045417		0.315919	0.431334		0.591932	0.025429		0.599555	0.037912		-2.0762	0.515557		-2.09331	2.43922		-2.09363	1.32786
	0.315997	0.045475		0.316609	0.429991		0.593223	0.026094		0.600863	0.037303		-2.07552	0.512067		-2.09266	2.42606		-2.09299	1.31908
	0.316684	0.044864		0.317298	0.428499		0.594514	0.025988		0.60217	0.037003		-2.07483	0.508999		-2.09202	2.41211		-2.09234	1.3099
	0.317371	0.044442		0.317988	0.426627		0.595805	0.025642		0.603478	0.035806		-2.07415	0.506493		-2.09137	2.39851		-2.0917	1.30107
	0.318058	0.044307		0.318677	0.423966		0.597096	0.025651		0.604786	0.036847		-2.07347	0.503155		-2.09072	2.3859		-2.09106	1.29248
	0.318746	0.043688		0.319366	0.42296		0.598387	0.024512		0.606094	0.036347		-2.07278	0.500374		-2.09008	2.37443		-2.09042	1.28378
	0.319433	0.043038		0.320056	0.420837		0.599678	0.023858		0.607402	0.035502		-2.0721	0.497524		-2.08943	2.36227		-2.08977	1.27501
	0.320121	0.042275		0.320745	0.420367		0.600969	0.023958		0.60871	0.035376		-2.07141	0.495063		-2.08879	2.35052		-2.08913	1.26726
	0.320808	0.041631		0.321434	0.419544		0.60226	0.022669		0.610018	0.034399		-2.07073	0.491872		-2.08814	2.33925		-2.08849	1.25818
	0.321495	0.041202		0.322124	0.418291		0.603551	0.021895		0.611326	0.032538		-2.07005	0.48927		-2.0875	2.32786		-2.08785	1.24934
	0.322183	0.040813		0.322813	0.416877		0.604842	0.021839		0.612633	0.031708		-2.06936	0.486927		-2.08685	2.31533		-2.0872	1.24128
	0.32287	0.040861		0.323503	0.41626		0.606133	0.021896		0.613941	0.032353		-2.06868	0.483355		-2.08621	2.3028		-2.08656	1.23187
	0.323557	0.04113		0.324192	0.414038		0.607424	0.020506		0.615249	0.030941		-2.06799	0.480534		-2.08556	2.29036		-2.08592	1.22346
	0.324244	0.041639		0.324881	0.41262		0.608715	0.020129		0.616557	0.032142		-2.06731	0.477633		-2.08491	2.27843		-2.08528	1.21545
	0.324932	0.041369		0.325571	0.411588		0.610006	0.021391		0.617865	0.032648		-2.06663	0.47385		-2.08427	2.2668		-2.08464	1.20698
	0.325619	0.041307		0.32626	0.4102		0.611297	0.021948		0.619173	0.032036		-2.06594	0.470722		-2.08362	2.25436		-2.08399	1.19878
	0.326307	0.040973		0.32695	0.409242		0.612588	0.021051		0.620481	0.030622		-2.06526	0.46743		-2.08298	2.24258		-2.08335	1.19196
	0.326994	0.041449		0.327639	0.408751		0.613879	0.021874		0.621789	0.029389		-2.06458	0.464965		-2.08233	2.23188		-2.08271	1.18544
	0.327681	0.042527		0.328328	0.407686		0.61517	0.022406		0.623096	0.029326		-2.06389	0.461631		-2.08168	2.22019		-2.08207	1.17787
	0.328369	0.042497		0.329018	0.405231		0.616461	0.021573		0.624404	0.028391		-2.06321	0.459278		-2.08104	2.20897		-2.08142	1.17044
	0.329056	0.041221		0.329707	0.403738		0.617752	0.022198		0.625712	0.028438		-2.06252	0.45681		-2.08039	2.19859		-2.08078	1.16307
	0.329743	0.040609		0.330396	0.402252		0.619043	0.021841		0.62702	0.027695		-2.06184	0.454242		-2.07975	2.18716		-2.08014	1.15563
	0.330431	0.039269		0.331086	0.399311		0.620334	0.022159		0.628328	0.025866		-2.06116	0.451981		-2.0791	2.17626		-2.0795	1.14809
	0.331118	0.039088		0.331775	0.397537		0.621625	0.020692		0.629636	0.025184		-2.06047	0.449343		-2.07846	2.16542		-2.07885	1.14117
	0.331805	0.039242		0.332465	0.396264		0.622916	0.019549		0.630944	0.025461		-2.05979	0.446387		-2.07781	2.15414		-2.07821	1.13377
	0.332493	0.039352		0.333154	0.394982		0.624207	0.018717		0.632252	0.02478		-2.05911	0.444281		-2.07716	2.14394		-2.07757	1.12645
	0.33318	0.03908		0.333843	0.394529		0.625498	0.017708		0.633559	0.023221		-2.05842	0.442279		-2.07652	2.13329		-2.07693	1.1185
	0.333867	0.039017		0.334533	0.393535		0.626789	0.017612		0.634867	0.022732		-2.05774	0.439547		-2.07587	2.12245		-2.07628	1.11166
	0.334555	0.038887		0.335222	0.390908		0.62808	0.017916		0.636175	0.021838		-2.05705	0.437649		-2.07523	2.11135		-2.07564	1.10556
	0.335242	0.040067		0.335912	0.390452		0.629372	0.01876		0.637483	0.020701		-2.05637	0.43483		-2.07458	2.10166		-2.075	1.09884
	0.335929	0.039063		0.336601	0.389972		0.630662	0.019356		0.638791	0.020229		-2.05569	0.432067		-2.07394	2.09308		-2.07436	1.09108
	0.336617	0.038347		0.33729	0.388644		0.631953	0.0188		0.640099	0.019969		-2.055	0.429291		-2.07329	2.0832		-2.07371	1.08478
	0.337304	0.038372		0.33798	0.387634		0.633245	0.019708		0.641407	0.020109		-2.05432	0.42643		-2.07264	2.07306		-2.07307	1.07907
	0.337991	0.037622		0.338669	0.385635		0.634535	0.020348		0.642715	0.020293		-2.05363	0.423439		-2.072	2.06264		-2.07243	1.07339
	0.338679	0.037611		0.339359	0.384292		0.635826	0.020004		0.644022	0.021229		-2.05295	0.421019		-2.07135	2.05254		-2.07179	1.06702
	0.339366	0.037602		0.340048	0.383695		0.637117	0.01989		0.64533	0.021231		-2.05227	0.418482		-2.07071	2.04238		-2.07115	1.06087
	0.340053	0.037917		0.340737	0.383082		0.638409	0.020621		0.646638	0.021117		-2.05158	0.416016		-2.07006	2.03145		-2.0705	1.05429
	0.340741	0.038172		0.341427	0.38167		0.639699	0.021163		0.647946	0.02136		-2.0509	0.41403		-2.06941	2.02156		-2.06986	1.04799
	0.341428	0.038357		0.342116	0.380617		0.64099	0.020451		0.649254	0.020859		-2.05022	0.412683		-2.06877	2.01169		-2.06922	1.04177
	0.342115	0.038405		0.342805	0.379507		0.642282	0.019204		0.650562	0.020461		-2.04953	0.41076		-2.06812	2.00201		-2.06858	1.03527
	0.342803	0.038131		0.343495	0.377515		0.643572	0.018221		0.65187	0.020999		-2.04885	0.40941		-2.06748	1.99196		-2.06793	1.02831
	0.34349	0.037637		0.344184	0.375564		0.644863	0.016958		0.653178	0.021471		-2.04816	0.407782		-2.06683	1.98287		-2.06729	1.02165
	0.344177	0.036098		0.344873	0.374584		0.646154	0.016183		0.654485	0.022088		-2.04748	0.40515		-2.06619	1.974		-2.06665	1.01475
	0.344865	0.035756		0.345563	0.373892		0.647446	0.016231		0.655793	0.023122		-2.0468	0.402636		-2.06554	1.96435		-2.06601	1.00736
	0.345552	0.035482		0.346252	0.372678		0.648736	0.016815		0.657101	0.025199		-2.04611	0.400136		-2.06489	1.95518		-2.06536	1.00003
	0.346239	0.036036		0.346942	0.371639		0.650027	0.017125		0.658409	0.023906		-2.04543	0.398287		-2.06425	1.9456		-2.06472	0.992725
	0.346927	0.036899		0.347631	0.370333		0.651319	0.017353		0.659717	0.022445		-2.04474	0.395524		-2.0636	1.93596		-2.06408	0.986867
	0.347614	0.037257		0.34832	0.368745		0.652609	0.017482		0.661025	0.023006		-2.04406	0.393595		-2.06296	1.92717		-2.06344	0.980962
	0.348301	0.038069		0.34901	0.367011		0.6539	0.018073		0.662333	0.021975		-2.04338	0.392218		-2.06231	1.91765		-2.06279	0.975689
	0.348989	0.037485		0.349699	0.365177		0.655191	0.019411		0.66364	0.022218		-2.04269	0.39064		-2.06167	1.90892		-2.06215	0.970114
	0.349676	0.036595		0.350389	0.363729		0.656483	0.020345		0.664948	0.021573		-2.04201	0.388575		-2.06102	1.90057		-2.06151	0.964372
	0.350363	0.03616		0.351078	0.362113		0.657773	0.020475		0.666256	0.021994		-2.04133	0.386113		-2.06037	1.89175		-2.06087	0.958543
	0.351051	0.037124		0.351767	0.360839		0.659064	0.021044		0.667564	0.021164		-2.04064	0.384099		-2.05973	1.88293		-2.06022	0.952561
	0.351738	0.037093		0.352457	0.360385		0.660356	0.021099		0.668872	0.022745		-2.03996	0.382142		-2.05908	1.87366		-2.05958	0.947295
	0.352425	0.035977		0.353146	0.359088		0.661646	0.020744		0.67018	0.02365		-2.03927	0.380255		-2.05844	1.86375		-2.05894	0.941874
	0.353113	0.036631		0.353836	0.357699		0.662937	0.02151		0.671488	0.023475		-2.03859	0.378123		-2.05779	1.85493		-2.0583	0.936066
	0.3538	0.036821		0.354525	0.356602		0.664228	0.021254		0.672796	0.02375		-2.03791	0.376857		-2.05715	1.84599		-2.05765	0.930089
	0.354487	0.037843		0.355214	0.355472		0.66552	0.022186		0.674103	0.02293		-2.03722	0.375416		-2.0565	1.83681		-2.05701	0.924078
	0.355175	0.038023		0.355904	0.353926		0.66681	0.021936		0.675411	0.021604		-2.03654	0.374215		-2.05585	1.82713		-2.05637	0.919341
	0.355862	0.038701		0.356593	0.351423		0.668101	0.021579		0.676719	0.021579		-2.03585	0.372942		-2.05521	1.81835		-2.05573	0.915307
	0.356549	0.038882		0.357282	0.348411		0.669393	0.020697		0.678027	0.021948		-2.03517	0.37126		-2.05456	1.80971		-2.05508	0.909907
	0.357237	0.038472		0.357972	0.347626		0.670683	0.020859		0.679335	0.020112		-2.03449	0.369748		-2.05392	1.8016		-2.05444	0.904229
	0.357924	0.038781		0.358661	0.346693		0.671974	0.02021		0.680643	0.020311		-2.0338	0.368999		-2.05327	1.79377		-2.0538	0.899058
	0.358611	0.038968		0.359351	0.344502		0.673265	0.02101		0.681951	0.020854		-2.03312	0.368145		-2.05262	1.78543		-2.05316	0.89351
	0.359299	0.039445		0.36004	0.342722		0.674557	0.021288		0.683259	0.020401		-2.03243	0.367831		-2.05198	1.77753		-2.05251	0.889245
	0.359986	0.039146		0.360729	0.340822		0.675847	0.022858		0.684566	0.020478		-2.03175	0.367649		-2.05133	1.7686		-2.05187	0.884318
	0.360673	0.03805		0.361419	0.338479		0.677138	0.023303		0.685874	0.02003		-2.03107	0.367049		-2.05069	1.75968		-2.05123	0.879035
	0.361361	0.037377		0.362108	0.336429		0.67843	0.024035		0.687182	0.020051		-2.03038	0.365904		-2.05004	1.75165		-2.05059	0.874081
	0.362048	0.035984		0.362797	0.335216		0.679721	0.024344		0.68849	0.019349		-2.0297	0.364244		-2.0494	1.74291		-2.04994	0.868789
	0.362735	0.034966		0.363487	0.334235		0.681011	0.023449		0.689798	0.017433		-2.02902	0.362599		-2.04875	1.73432		-2.0493	0.864565
	0.363423	0.035484		0.364176	0.332306		0.682302	0.023356		0.691106	0.017149		-2.02833	0.361522		-2.04811	1.72678		-2.04866	0.859362
	0.36411	0.035664		0.364866	0.331605		0.683594	0.02306		0.692414	0.018767		-2.02765	0.359565		-2.04746	1.71893		-2.04802	0.854767
	0.364797	0.035801		0.365555	0.330967		0.684884	0.022814		0.693722	0.018972		-2.02696	0.357615		-2.04681	1.71043		-2.04737	0.850622
	0.365485	0.035689		0.366244	0.329343		0.686175	0.023388		0.695029	0.018985		-2.02628	0.356937		-2.04617	1.70305		-2.04673	0.845705
	0.366172	0.034749		0.366934	0.327849		0.687467	0.022311		0.696337	0.017572		-2.0256	0.35627		-2.04552	1.69626		-2.04609	0.840668
	0.366859	0.034277		0.367623	0.326197		0.688758	0.023915		0.697645	0.018362		-2.02491	0.355337		-2.04488	1.68966		-2.04545	0.836084
	0.367547	0.033898		0.368313	0.323658		0.690048	0.024385		0.698953	0.019415		-2.02423	0.354162		-2.04423	1.6829		-2.04481	0.832239
	0.368234	0.033236		0.369002	0.322405		0.691339	0.023525		0.700261	0.02102		-2.02354	0.351951		-2.04359	1.67526		-2.04416	0.826832
	0.368921	0.032037		0.369691	0.320792		0.692631	0.022468		0.701569	0.020922		-2.02286	0.349882		-2.04294	1.66748		-2.04352	0.821759
	0.369609	0.030926		0.370381	0.319022		0.693921	0.022465		0.702877	0.020482		-2.02218	0.348334		-2.04229	1.6593		-2.04288	0.816451
	0.370296	0.030555		0.37107	0.318152		0.695212	0.021596		0.704185	0.018949		-2.02149	0.347381		-2.04165	1.65128		-2.04223	0.812659
	0.370983	0.03064		0.371759	0.317066		0.696504	0.021727		0.705492	0.018382		-2.02081	0.346174		-2.041	1.64298		-2.04159	0.808068
	0.371671	0.029155		0.372449	0.315801		0.697795	0.021189		0.7068	0.017298		-2.02013	0.344955		-2.04036	1.63509		-2.04095	0.803073
	0.372358	0.029135		0.373138	0.314617		0.699085	0.020942		0.708108	0.017957		-2.01944	0.343246		-2.03971	1.62752		-2.04031	0.797293
	0.373045	0.028706		0.373828	0.312952		0.700377	0.021891		0.709416	0.017656		-2.01876	0.342218		-2.03906	1.61998		-2.03966	0.791881
	0.373733	0.028792		0.374517	0.311049		0.701668	0.022582		0.710724	0.017017		-2.01807	0.341131		-2.03842	1.61299		-2.03902	0.787968
	0.37442	0.029103		0.375206	0.309854		0.702958	0.022153		0.712032	0.017415		-2.01739	0.339887		-2.03777	1.60604		-2.03838	0.783706
	0.375107	0.029211		0.375896	0.308845		0.704249	0.02249		0.71334	0.015406		-2.01671	0.338172		-2.03713	1.59899		-2.03774	0.779696
	0.375795	0.028932		0.376585	0.30706		0.705541	0.021884		0.714648	0.012594		-2.01602	0.335691		-2.03648	1.59207		-2.0371	0.775266
	0.376482	0.028784		0.377275	0.305091		0.706832	0.021659		0.715955	0.012094		-2.01534	0.334648		-2.03584	1.58508		-2.03645	0.771028
	0.377169	0.02888		0.377964	0.304179		0.708122	0.021591		0.717263	0.011388		-2.01465	0.332525		-2.03519	1.57787		-2.03581	0.767681
	0.377857	0.029258		0.378653	0.303254		0.709414	0.021471		0.718571	0.011167		-2.01397	0.331735		-2.03454	1.57053		-2.03517	0.763708
	0.378544	0.029286		0.379343	0.301326		0.710705	0.021395		0.719879	0.012264		-2.01329	0.331843		-2.0339	1.56359		-2.03453	0.759831
	0.379231	0.029334		0.380032	0.299258		0.711995	0.020789		0.721187	0.011425		-2.0126	0.330557		-2.03325	1.55679		-2.03388	0.75663
	0.379919	0.029327		0.380721	0.297623		0.713286	0.019882		0.722495	0.011653		-2.01192	0.329815		-2.03261	1.55025		-2.03324	0.753834
	0.380606	0.028547		0.381411	0.296112		0.714578	0.019449		0.723803	0.011159		-2.01124	0.327954		-2.03196	1.54352		-2.0326	0.750272
	0.381293	0.027471		0.3821	0.294979		0.715869	0.018781		0.725111	0.009879		-2.01055	0.327438		-2.03132	1.53621		-2.03196	0.745223
	0.381981	0.026432		0.38279	0.292594		0.717159	0.019042		0.726418	0.009465		-2.00987	0.326052		-2.03067	1.52958		-2.03131	0.741708
	0.382668	0.025873		0.383479	0.289637		0.718451	0.017953		0.727726	0.009883		-2.00918	0.324478		-2.03002	1.52283		-2.03067	0.7367
	0.383355	0.026039		0.384168	0.288187		0.719742	0.018091		0.729034	0.01047		-2.0085	0.32168		-2.02938	1.51588		-2.03003	0.732682
	0.384043	0.026245		0.384858	0.285606		0.721033	0.018001		0.730342	0.010046		-2.00782	0.320259		-2.02873	1.50986		-2.02939	0.72842
	0.38473	0.025979		0.385547	0.284352		0.722323	0.01759		0.73165	0.009243		-2.00713	0.319505		-2.02809	1.5034		-2.02874	0.725225
	0.385417	0.024891		0.386236	0.282491		0.723615	0.019041		0.732958	0.0086		-2.00645	0.317127		-2.02744	1.49639		-2.0281	0.721422
	0.386105	0.023848		0.386926	0.281487		0.724906	0.019276		0.734266	0.007758		-2.00576	0.316492		-2.02679	1.48891		-2.02746	0.717402
	0.386792	0.022971		0.387615	0.280087		0.726196	0.018554		0.735574	0.007328		-2.00508	0.315504		-2.02615	1.48277		-2.02682	0.71427
	0.387479	0.022635		0.388305	0.279113		0.727488	0.019634		0.736881	0.008043		-2.0044	0.314711		-2.0255	1.47639		-2.02617	0.711565
	0.388167	0.021427		0.388994	0.27789		0.728779	0.018413		0.738189	0.007434		-2.00371	0.313337		-2.02486	1.47043		-2.02553	0.707873
	0.388854	0.019982		0.389683	0.27663		0.73007	0.01786		0.739497	0.007531		-2.00303	0.31203		-2.02421	1.46383		-2.02489	0.703411
	0.389541	0.018904		0.390373	0.274741		0.73136	0.018686		0.740805	0.00823		-2.00235	0.310394		-2.02357	1.45783		-2.02425	0.69938
	0.390229	0.01836		0.391062	0.274237		0.732652	0.017561		0.742113	0.008102		-2.00166	0.308751		-2.02292	1.45169		-2.0236	0.695323
	0.390916	0.018545		0.391752	0.273919		0.733943	0.016971		0.743421	0.008047		-2.00098	0.307849		-2.02227	1.44588		-2.02296	0.691262
	0.391603	0.017844		0.392441	0.271971		0.735233	0.017006		0.744729	0.008237		-2.00029	0.305763		-2.02163	1.43952		-2.02232	0.687951
	0.392291	0.016801		0.39313	0.270078		0.736525	0.016644		0.746037	0.008505		-1.99961	0.304332		-2.02098	1.43274		-2.02168	0.685552
	0.392978	0.015849		0.39382	0.270673		0.737816	0.01619		0.747344	0.010076		-1.99893	0.303441		-2.02034	1.42748		-2.02103	0.682967
	0.393665	0.015379		0.394509	0.269935		0.739107	0.015974		0.748652	0.010996		-1.99824	0.30092		-2.01969	1.42213		-2.02039	0.67972
	0.394353	0.016119		0.395199	0.269135		0.740397	0.015857		0.74996	0.0109		-1.99756	0.299328		-2.01905	1.41695		-2.01975	0.67685
	0.39504	0.016299		0.395888	0.269643		0.741689	0.015791		0.751268	0.010689		-1.99687	0.296794		-2.0184	1.41088		-2.01911	0.673687
	0.395727	0.015659		0.396577	0.268414		0.74298	0.016121		0.752576	0.009041		-1.99619	0.295472		-2.01775	1.4062		-2.01846	0.670172
	0.396415	0.01524		0.397267	0.267029		0.74427	0.017589		0.753884	0.008167		-1.99551	0.295068		-2.01711	1.40078		-2.01782	0.667106
	0.397102	0.014643		0.397956	0.266026		0.745562	0.018201		0.755192	0.007591		-1.99482	0.293403		-2.01646	1.39536		-2.01718	0.663511
	0.397789	0.014258		0.398645	0.265697		0.746853	0.018223		0.7565	0.007884		-1.99414	0.291354		-2.01582	1.38921		-2.01654	0.660007
	0.398477	0.013851		0.399335	0.265046		0.748144	0.018903		0.757807	0.00721		-1.99346	0.290497		-2.01517	1.38345		-2.01589	0.657085
	0.399164	0.012898		0.400024	0.263564		0.749434	0.019842		0.759115	0.006688		-1.99277	0.28937		-2.01452	1.37859		-2.01525	0.653527
	0.399851	0.01243		0.400713	0.262317		0.750726	0.020878		0.760423	0.006246		-1.99209	0.286529		-2.01388	1.37287		-2.01461	0.649773
	0.400539	0.012852		0.401403	0.260982		0.752017	0.0207		0.761731	0.006302		-1.99141	0.284998		-2.01323	1.36617		-2.01397	0.646941
	0.401226	0.013188		0.402092	0.260653		0.753307	0.020868		0.763039	0.005087		-1.99072	0.283552		-2.01259	1.35971		-2.01333	0.643904
	0.401913	0.012846		0.402782	0.260812		0.754599	0.020426		0.764347	0.003838		-1.99004	0.283023		-2.01194	1.35453		-2.01268	0.639821
	0.402601	0.012671		0.403471	0.259589		0.75589	0.019263		0.765655	0.002881		-1.98935	0.282338		-2.0113	1.34961		-2.01204	0.63623
	0.403288	0.012769		0.40416	0.258756		0.757181	0.019069		0.766963	0.002648		-1.98867	0.281125		-2.01065	1.34373		-2.0114	0.633177
	0.403975	0.012908		0.40485	0.257582		0.758471	0.01936		0.76827	0.002133		-1.98798	0.279049		-2.01001	1.33757		-2.01076	0.630547
	0.404663	0.012857		0.405539	0.256091		0.759763	0.019535		0.769578	0.002438		-1.9873	0.277921		-2.00936	1.33187		-2.01011	0.627607
	0.40535	0.012592		0.406229	0.254104		0.761054	0.020024		0.770886	0.003369		-1.98662	0.276189		-2.00871	1.32668		-2.00947	0.624036
	0.406037	0.012894		0.406918	0.253887		0.762344	0.019625		0.772194	0.004753		-1.98593	0.275176		-2.00807	1.32182		-2.00883	0.621031
	0.406725	0.012634		0.407607	0.252393		0.763636	0.019411		0.773502	0.004077		-1.98525	0.275335		-2.00742	1.31713		-2.00819	0.618219
	0.407412	0.012317		0.408297	0.251874		0.764927	0.019851		0.77481	0.004186		-1.98457	0.27347		-2.00678	1.31181		-2.00754	0.614942
	0.408099	0.011204		0.408986	0.250987		0.766218	0.020395		0.776118	0.003917		-1.98388	0.27163		-2.00613	1.30578		-2.0069	0.612071
	0.408787	0.010271		0.409676	0.249537		0.767509	0.021022		0.777426	0.00399		-1.9832	0.270299		-2.00549	1.30009		-2.00626	0.609163
	0.409474	0.009303		0.410365	0.248129		0.7688	0.022089		0.778733	0.004314		-1.98252	0.268527		-2.00484	1.29557		-2.00562	0.607071
	0.410161	0.008037		0.411054	0.24782		0.770091	0.022795		0.780041	0.003316		-1.98183	0.26709		-2.00419	1.29059		-2.00497	0.604845
	0.410849	0.00734		0.411744	0.247292		0.771382	0.022811		0.781349	0.002536		-1.98115	0.265548		-2.00355	1.2853		-2.00433	0.602487
	0.411536	0.007046		0.412433	0.245567		0.772673	0.022049		0.782657	0.002163		-1.98046	0.263882		-2.0029	1.28		-2.00369	0.600035
	0.412223	0.006891		0.413122	0.244011		0.773964	0.022472		0.783965	0.002984		-1.97978	0.26198		-2.00226	1.27465		-2.00305	0.597478
	0.412911	0.007172		0.413812	0.244777		0.775255	0.020956		0.785273	0.002756		-1.9791	0.259862		-2.00161	1.26918		-2.0024	0.595716
	0.413598	0.007077		0.414501	0.244897		0.776546	0.019868		0.786581	0.002469		-1.97841	0.258074		-2.00096	1.26383		-2.00176	0.593443
	0.414285	0.005558		0.415191	0.243999		0.777837	0.020267		0.787889	0.003157		-1.97773	0.256627		-2.00032	1.25882		-2.00112	0.590315
	0.414973	0.005506		0.41588	0.243139		0.779128	0.019808		0.789196	0.002424		-1.97704	0.255023		-1.99967	1.25311		-2.00048	0.587246
	0.41566	0.005721		0.416569	0.241644		0.780419	0.019803		0.790504	0.004017		-1.97636	0.253336		-1.99903	1.24819		-1.99984	0.584706
	0.416348	0.005901		0.417259	0.240922		0.78171	0.019465		0.791812	0.004439		-1.97568	0.252149		-1.99838	1.24341		-1.99919	0.581923
	0.417035	0.006389		0.417948	0.241435		0.783001	0.020476		0.79312	0.00475		-1.97499	0.250959		-1.99774	1.23891		-1.99855	0.57942
	0.417722	0.007203		0.418638	0.241336		0.784292	0.021179		0.794428	0.004022		-1.97431	0.250012		-1.99709	1.23443		-1.99791	0.577419
	0.418409	0.006732		0.419327	0.241349		0.785583	0.020071		0.795736	0.003905		-1.97362	0.249733		-1.99644	1.23052		-1.99727	0.576041
	0.419097	0.007084		0.420016	0.24112		0.786874	0.020299		0.797044	0.002735		-1.97294	0.248592		-1.9958	1.22674		-1.99662	0.574051
	0.419784	0.008079		0.420706	0.24048		0.788165	0.02156		0.798352	0.003146		-1.97226	0.247302		-1.99515	1.22379		-1.99598	0.571925
	0.420471	0.008291		0.421395	0.239441		0.789456	0.021813		0.799659	0.003079		-1.97157	0.245448		-1.99451	1.22017		-1.99534	0.56985
	0.421159	0.010014		0.422084	0.238937		0.790747	0.020921		0.800967	0.001768		-1.97089	0.24287		-1.99386	1.21608		-1.9947	0.566345
	0.421846	0.010397		0.422774	0.238167		0.792038	0.022281		0.802275	0.000325		-1.97021	0.241175		-1.99321	1.21096		-1.99405	0.562775
	0.422534	0.010142		0.423463	0.236986		0.793329	0.022726		0.803583	0.000109		-1.96952	0.239742		-1.99257	1.20758		-1.99341	0.560466
	0.423221	0.010955		0.424153	0.235678		0.79462	0.022005		0.804891	-0.00026		-1.96884	0.238329		-1.99192	1.20345		-1.99277	0.55898
	0.423908	0.011618		0.424842	0.234913		0.795911	0.022201		0.806199	-0.000649		-1.96815	0.236889		-1.99128	1.19902		-1.99212	0.557258
	0.424595	0.01165		0.425531	0.234385		0.797202	0.022402		0.807507	-0.00111		-1.96747	0.235237		-1.99063	1.19481		-1.99148	0.55445
	0.425283	0.011671		0.426221	0.233759		0.798493	0.021435		0.808815	-0.000898		-1.96679	0.233941		-1.98999	1.19059		-1.99084	0.552405
	0.42597	0.012035		0.42691	0.233544		0.799784	0.020892		0.810122	-0.000212		-1.9661	0.232989		-1.98934	1.18721		-1.9902	0.55044
	0.426657	0.012497		0.427599	0.233289		0.801075	0.020294		0.81143	-0.001171		-1.96542	0.231457		-1.9887	1.18248		-1.98956	0.547954
	0.427345	0.012892		0.428289	0.232098		0.802366	0.019251		0.812738	-0.001801		-1.96473	0.230044		-1.98805	1.17829		-1.98891	0.545731
	0.428032	0.013714		0.428978	0.231019		0.803657	0.01932		0.814046	-0.001683		-1.96405	0.228709		-1.9874	1.17421		-1.98827	0.543209
	0.42872	0.014001		0.429668	0.230628		0.804948	0.019766		0.815354	-0.002789		-1.96337	0.227354		-1.98676	1.17059		-1.98763	0.540242
	0.429407	0.014069		0.430357	0.228903		0.806239	0.019295		0.816662	-0.003947		-1.96268	0.226205		-1.98611	1.16568		-1.98699	0.537764
	0.430094	0.014355		0.431046	0.227515		0.80753	0.019397		0.81797	-0.003673		-1.962	0.224983		-1.98547	1.16121		-1.98634	0.53541
	0.430781	0.014696		0.431736	0.227047		0.808821	0.01991		0.819278	-0.004691		-1.96132	0.222963		-1.98482	1.15668		-1.9857	0.533755
	0.431469	0.015307		0.432425	0.225804		0.810112	0.017761		0.820585	-0.005756		-1.96063	0.221734		-1.98418	1.15281		-1.98506	0.532616
	0.432156	0.015666		0.433115	0.224574		0.811403	0.01808		0.821893	-0.004319		-1.95995	0.221054		-1.98353	1.14923		-1.98442	0.531166
	0.432843	0.015772		0.433804	0.222694		0.812694	0.016928		0.823201	-0.004921		-1.95926	0.219787		-1.98288	1.14508		-1.98377	0.528864
	0.433531	0.016635		0.434493	0.221637		0.813985	0.016897		0.824509	-0.004469		-1.95858	0.218543		-1.98224	1.14065		-1.98313	0.526665
	0.434218	0.017217		0.435183	0.221529		0.815276	0.01488		0.825817	-0.005312		-1.9579	0.217511		-1.98159	1.13729		-1.98249	0.524747
	0.434906	0.017115		0.435872	0.221554		0.816567	0.013856		0.827125	-0.005431		-1.95721	0.216038		-1.98095	1.13424		-1.98185	0.522771
	0.435593	0.017158		0.436561	0.220888		0.817858	0.014516		0.828433	-0.004546		-1.95653	0.214245		-1.9803	1.12993		-1.9812	0.520973
	0.43628	0.017945		0.437251	0.219062		0.819149	0.013651		0.829741	-0.001788		-1.95585	0.21214		-1.97965	1.12523		-1.98056	0.520072
	0.436967	0.019124		0.43794	0.218224		0.82044	0.012817		0.831048	-0.002771		-1.95516	0.210508		-1.97901	1.12184		-1.97992	0.51921
	0.437655	0.01951		0.43863	0.217004		0.821732	0.013206		0.832356	-0.001999		-1.95448	0.209113		-1.97836	1.11843		-1.97928	0.517495
	0.438342	0.019181		0.439319	0.215794		0.823022	0.012734		0.833664	-0.000593		-1.95379	0.208273		-1.97772	1.11558		-1.97863	0.515855
	0.439029	0.018434		0.440008	0.215476		0.824313	0.011213		0.834972	-0.000397		-1.95311	0.207189		-1.97707	1.11237		-1.97799	0.514614
	0.439717	0.017912		0.440698	0.21539		0.825604	0.010097		0.83628	-0.00037		-1.95243	0.206132		-1.97643	1.1089		-1.97735	0.514035
	0.440404	0.017997		0.441387	0.214012		0.826895	0.01115		0.837588	-0.001473		-1.95174	0.20427		-1.97578	1.1052		-1.97671	0.512587
	0.441092	0.017695		0.442076	0.213525		0.828186	0.010175		0.838896	-0.001899		-1.95106	0.202643		-1.97513	1.10155		-1.97606	0.511646
	0.441779	0.017694		0.442766	0.212938		0.829477	0.009525		0.840204	-0.002812		-1.95037	0.201799		-1.97449	1.09912		-1.97542	0.511094
	0.442466	0.018518		0.443455	0.21207		0.830769	0.009906		0.841511	-0.003656		-1.94969	0.201543		-1.97384	1.0964		-1.97478	0.509773
	0.443153	0.019551		0.444145	0.211259		0.832059	0.008535		0.842819	-0.004679		-1.94901	0.200486		-1.9732	1.09283		-1.97414	0.507673
	0.443841	0.020538		0.444834	0.210552		0.83335	0.008252		0.844127	-0.004361		-1.94832	0.199898		-1.97255	1.08906		-1.97349	0.505797
	0.444528	0.020519		0.445524	0.209334		0.834641	0.007829		0.845435	-0.002921		-1.94764	0.198784		-1.97191	1.08594		-1.97285	0.503656
	0.445215	0.020063		0.446213	0.208765		0.835932	0.008559		0.846743	-0.002054		-1.94695	0.197936		-1.97126	1.08247		-1.97221	0.502087
	0.445903	0.019538		0.446902	0.208585		0.837223	0.007978		0.848051	-0.001271		-1.94627	0.198159		-1.97061	1.0791		-1.97157	0.499777
	0.44659	0.018726		0.447592	0.208069		0.838514	0.007621		0.849359	-0.000964		-1.94559	0.197512		-1.96997	1.07673		-1.97093	0.497322
	0.447278	0.018507		0.448281	0.206152		0.839806	0.007355		0.850667	-0.000447		-1.9449	0.196318		-1.96932	1.07392		-1.97028	0.495392
	0.447965	0.01921		0.44897	0.205127		0.841096	0.00816		0.851974	1.5e-05		-1.94422	0.19629		-1.96868	1.07054		-1.96964	0.493223
	0.448652	0.019052		0.44966	0.203933		0.842387	0.009494		0.853282	0.000388		-1.94354	0.195017		-1.96803	1.06782		-1.969	0.492033
	0.449339	0.018972		0.450349	0.203553		0.843678	0.00885		0.85459	-0.000845		-1.94285	0.19398		-1.96738	1.06511		-1.96836	0.491068
	0.450027	0.01943		0.451039	0.2038		0.844969	0.009158		0.855898	-0.001591		-1.94217	0.193761		-1.96674	1.0618		-1.96771	0.489918
	0.450714	0.019574		0.451728	0.203878		0.84626	0.008707		0.857206	-0.002259		-1.94148	0.193012		-1.96609	1.05859		-1.96707	0.488398
	0.451401	0.018014		0.452417	0.202503		0.847551	0.008357		0.858514	-0.002111		-1.9408	0.191888		-1.96545	1.05484		-1.96643	0.486884
	0.452089	0.01788		0.453107	0.201611		0.848843	0.007556		0.859822	-0.000876		-1.94012	0.190178		-1.9648	1.0515		-1.96579	0.485527
	0.452776	0.017777		0.453796	0.200944		0.850133	0.00792		0.86113	0.000399		-1.93943	0.189555		-1.96416	1.04788		-1.96514	0.483666
	0.453464	0.016616		0.454485	0.200658		0.851424	0.008724		0.862437	-0.001323		-1.93875	0.188275		-1.96351	1.04485		-1.9645	0.481506
	0.454151	0.017125		0.455175	0.200475		0.852715	0.008431		0.863745	-0.002494		-1.93806	0.188438		-1.96287	1.04153		-1.96386	0.479883
	0.454838	0.016237		0.455864	0.199428		0.854006	0.008554		0.865053	-0.002602		-1.93738	0.188115		-1.96222	1.03797		-1.96322	0.478254
	0.455525	0.016485		0.456553	0.197428		0.855297	0.009315		0.866361	-0.002157		-1.9367	0.186983		-1.96157	1.03556		-1.96257	0.476473
	0.456213	0.016434		0.457243	0.196507		0.856588	0.009381		0.867669	-0.001558		-1.93601	0.186642		-1.96093	1.03325		-1.96193	0.475633
	0.4569	0.01571		0.457932	0.195781		0.85788	0.009216		0.868977	-0.001604		-1.93533	0.186589		-1.96028	1.03091		-1.96129	0.474582
	0.457587	0.015316		0.458622	0.19572		0.85917	0.009145		0.870285	-0.001943		-1.93465	0.185683		-1.95964	1.02863		-1.96065	0.473011
	0.458275	0.01524		0.459311	0.194822		0.860461	0.009811		0.871593	-0.001881		-1.93396	0.184417		-1.95899	1.02581		-1.96	0.470879
	0.458962	0.015325		0.460001	0.194182		0.861753	0.010416		0.8729	-0.000426		-1.93328	0.18323		-1.95834	1.02182		-1.95936	0.469504
	0.45965	0.015032		0.46069	0.193575		0.863043	0.010894		0.874208	8e-06		-1.93259	0.182571		-1.9577	1.01747		-1.95872	0.468476
	0.460337	0.014393		0.461379	0.192505		0.864334	0.010799		0.875516	-4.7e-05		-1.93191	0.182502		-1.95705	1.01465		-1.95808	0.467196
	0.461024	0.013948		0.462069	0.192098		0.865625	0.011143		0.876824	-0.000697		-1.93123	0.181926		-1.95641	1.01213		-1.95743	0.46538
	0.461711	0.012962		0.462758	0.191743		0.866917	0.011385		0.878132	-0.002396		-1.93054	0.180698		-1.95576	1.00964		-1.95679	0.463747
	0.462399	0.012061		0.463447	0.191055		0.868207	0.010516		0.87944	-0.003789		-1.92986	0.180151		-1.95512	1.00614		-1.95615	0.462471
	0.463086	0.01111		0.464137	0.190691		0.869498	0.009957		0.880748	-0.004024		-1.92918	0.178636		-1.95447	1.0038		-1.95551	0.461366
	0.463773	0.010193		0.464826	0.189978		0.87079	0.009082		0.882056	-0.004382		-1.92849	0.177752		-1.95382	1.0013		-1.95486	0.460232
	0.464461	0.010132		0.465516	0.189531		0.872081	0.00878		0.883363	-0.003924		-1.92781	0.176583		-1.95318	0.999115		-1.95422	0.458927
	0.465148	0.010544		0.466205	0.189471		0.873371	0.008815		0.884671	-0.004951		-1.92712	0.176543		-1.95253	0.996252		-1.95358	0.457288
	0.465836	0.009549		0.466894	0.189292		0.874662	0.008352		0.885979	-0.004545		-1.92644	0.175389		-1.95189	0.993515		-1.95294	0.455558
	0.466523	0.008738		0.467584	0.189107		0.875954	0.008218		0.887287	-0.003819		-1.92576	0.174494		-1.95124	0.990871		-1.95229	0.454564
	0.46721	0.008505		0.468273	0.189139		0.877244	0.008068		0.888595	-0.00488		-1.92507	0.173809		-1.9506	0.988772		-1.95165	0.453104
	0.467897	0.008032		0.468962	0.189103		0.878535	0.009105		0.889903	-0.003788		-1.92439	0.172843		-1.94995	0.985995		-1.95101	0.452181
	0.468585	0.00758		0.469652	0.188291		0.879827	0.009997		0.891211	-0.004168		-1.9237	0.172747		-1.9493	0.982469		-1.95037	0.450947
	0.469272	0.006646		0.470341	0.187034		0.881118	0.010422		0.892519	-0.005181		-1.92302	0.171928		-1.94866	0.979856		-1.94972	0.449694
	0.469959	0.005724		0.471031	0.186106		0.882408	0.009514		0.893826	-0.006266		-1.92234	0.171528		-1.94801	0.977741		-1.94908	0.448273
	0.470647	0.004915		0.47172	0.185593		0.883699	0.009672		0.895134	-0.006264		-1.92165	0.170587		-1.94737	0.974847		-1.94844	0.447448
	0.471334	0.003695		0.472409	0.185319		0.884991	0.009594		0.896442	-0.005905		-1.92097	0.169825		-1.94672	0.971958		-1.9478	0.445842
	0.472022	0.002232		0.473099	0.185892		0.886281	0.009052		0.89775	-0.00766		-1.92029	0.169788		-1.94607	0.969543		-1.94715	0.443904
	0.472709	0.002385		0.473788	0.185932		0.887572	0.009787		0.899058	-0.008458		-1.9196	0.168633		-1.94543	0.966691		-1.94651	0.442297
	0.473396	0.003005		0.474478	0.184928		0.888864	0.010052		0.900366	-0.008921		-1.91892	0.167331		-1.94478	0.964181		-1.94587	0.440711
	0.474083	0.002365		0.475167	0.184092		0.890155	0.010614		0.901674	-0.008663		-1.91823	0.166771		-1.94414	0.961179		-1.94523	0.439077
	0.474771	0.001806		0.475856	0.183185		0.891445	0.009551		0.902982	-0.008338		-1.91755	0.166185		-1.94349	0.957965		-1.94459	0.437672
	0.475458	0.001689		0.476546	0.182471		0.892736	0.00894		0.904289	-0.008076		-1.91687	0.165537		-1.94285	0.954254		-1.94394	0.436069
	0.476146	0.001735		0.477235	0.181498		0.894028	0.008532		0.905597	-0.009066		-1.91618	0.165614		-1.9422	0.951731		-1.9433	0.434526
	0.476833	0.001452		0.477924	0.180583		0.895318	0.009948		0.906905	-0.010706		-1.9155	0.165044		-1.94155	0.947993		-1.94266	0.43375
	0.47752	0.000177		0.478614	0.180144		0.896609	0.011329		0.908213	-0.010405		-1.91481	0.164852		-1.94091	0.945466		-1.94202	0.432311
	0.478208	-0.000606		0.479303	0.180384		0.897901	0.010702		0.909521	-0.009948		-1.91413	0.163484		-1.94026	0.944089		-1.94137	0.431003
	0.478895	-0.001265		0.479993	0.180747		0.899192	0.011315		0.910829	-0.00794		-1.91345	0.163257		-1.93962	0.94243		-1.94073	0.430133
	0.479582	-0.001732		0.480682	0.18046		0.900482	0.012284		0.912137	-0.005759		-1.91276	0.161655		-1.93897	0.940402		-1.94009	0.429068
	0.480269	-0.002175		0.481371	0.179761		0.901773	0.01326		0.913445	-0.005436		-1.91208	0.160785		-1.93833	0.938302		-1.93945	0.428321
	0.480957	-0.001848		0.482061	0.178704		0.903065	0.014778		0.914752	-0.005114		-1.91139	0.160739		-1.93768	0.935983		-1.9388	0.427525
	0.481644	-0.002347		0.48275	0.177718		0.904355	0.014018		0.91606	-0.006823		-1.91071	0.160787		-1.93703	0.93467		-1.93816	0.425735
	0.482332	-0.002766		0.483439	0.177394		0.905646	0.01347		0.917368	-0.005627		-1.91003	0.159565		-1.93639	0.932478		-1.93752	0.424657
	0.483019	-0.001874		0.484129	0.177369		0.906938	0.014657		0.918676	-0.005882		-1.90934	0.159261		-1.93574	0.929959		-1.93688	0.42336
	0.483706	-0.002503		0.484818	0.176667		0.908229	0.015051		0.919984	-0.006659		-1.90866	0.158381		-1.9351	0.927205		-1.93623	0.421573
	0.484394	-0.003186		0.485508	0.175551		0.909519	0.014729		0.921292	-0.005065		-1.90798	0.157159		-1.93445	0.924535		-1.93559	0.419412
	0.485081	-0.003348		0.486197	0.175461		0.91081	0.013163		0.9226	-0.005772		-1.90729	0.156372		-1.93381	0.923022		-1.93495	0.417416
	0.485768	-0.003383		0.486887	0.175543		0.912102	0.012523		0.923908	-0.006436		-1.90661	0.156361		-1.93316	0.920283		-1.93431	0.416117
	0.486455	-0.003755		0.487576	0.175452		0.913393	0.013071		0.925215	-0.005177		-1.90592	0.155869		-1.93251	0.918298		-1.93366	0.414527
	0.487143	-0.004471		0.488265	0.17533		0.914683	0.013647		0.926523	-0.0047		-1.90524	0.155507		-1.93187	0.915751		-1.93302	0.412892
	0.48783	-0.004851		0.488955	0.17432		0.915975	0.013856		0.927831	-0.002809		-1.90456	0.155002		-1.93122	0.913092		-1.93238	0.41177
	0.488518	-0.005963		0.489644	0.17342		0.917266	0.01329		0.929139	-0.002323		-1.90387	0.153433		-1.93058	0.910935		-1.93174	0.411244
	0.489205	-0.006027		0.490333	0.173667		0.918556	0.012607		0.930447	-0.002069		-1.90319	0.152826		-1.92993	0.908462		-1.93109	0.410374
	0.489892	-0.007261		0.491023	0.173555		0.919847	0.012386		0.931755	-0.003622		-1.9025	0.152063		-1.92928	0.905245		-1.93045	0.40927
	0.49058	-0.007596		0.491712	0.173703		0.921139	0.012849		0.933063	-0.003604		-1.90182	0.150713		-1.92864	0.902346		-1.92981	0.407603
	0.491267	-0.006965		0.492401	0.173557		0.92243	0.012261		0.934371	-0.005757		-1.90114	0.149409		-1.92799	0.899742		-1.92917	0.406108
	0.491954	-0.007624		0.493091	0.1729		0.92372	0.012543		0.935678	-0.006799		-1.90045	0.148954		-1.92735	0.897658		-1.92852	0.405302
	0.492641	-0.007721		0.49378	0.172151		0.925012	0.012843		0.936986	-0.00661		-1.89977	0.149095		-1.9267	0.895565		-1.92788	0.404471
	0.493329	-0.008004		0.49447	0.171159		0.926303	0.011952		0.938294	-0.006905		-1.89909	0.148882		-1.92606	0.89474		-1.92724	0.403352
	0.494016	-0.008303		0.495159	0.170476		0.927593	0.010349		0.939602	-0.005756		-1.8984	0.148164		-1.92541	0.892671		-1.9266	0.401973
	0.494704	-0.007972		0.495848	0.170363		0.928885	0.00995		0.94091	-0.006624		-1.89772	0.146419		-1.92477	0.889588		-1.92596	0.400301
	0.495391	-0.007455		0.496538	0.169918		0.930176	0.00975		0.942218	-0.007078		-1.89704	0.14522		-1.92412	0.886235		-1.92531	0.399242
	0.496078	-0.007549		0.497227	0.169186		0.931467	0.009746		0.943526	-0.009165		-1.89635	0.14429		-1.92347	0.883347		-1.92467	0.397958
	0.496766	-0.008679		0.497916	0.16953		0.932757	0.0096		0.944834	-0.010795		-1.89567	0.143945		-1.92283	0.881462		-1.92403	0.396629
	0.497453	-0.008231		0.498606	0.169501		0.934049	0.009883		0.946141	-0.010675		-1.89498	0.144623		-1.92218	0.879742		-1.92338	0.395166
	0.49814	-0.007824		0.499295	0.169796		0.93534	0.009105		0.947449	-0.01164		-1.8943	0.145091		-1.92154	0.877311		-1.92274	0.394186
	0.498827	-0.008049		0.499985	0.169332		0.93663	0.009167		0.948757	-0.011631		-1.89362	0.144222		-1.92089	0.874641		-1.9221	0.393003
	0.499515	-0.008333		0.500674	0.168915		0.937922	0.008082		0.950065	-0.012381		-1.89293	0.143074		-1.92024	0.872446		-1.92146	0.392139
	0.500202	-0.007846		0.501364	0.167764		0.939213	0.007951		0.951373	-0.013598		-1.89225	0.142455		-1.9196	0.870229		-1.92081	0.391917
	0.50089	-0.007379		0.502053	0.167148		0.940504	0.007218		0.952681	-0.013539		-1.89156	0.141781		-1.91895	0.867944		-1.92017	0.38986
	0.501577	-0.007538		0.502742	0.165671		0.941794	0.00734		0.953989	-0.013885		-1.89088	0.14118		-1.91831	0.865706		-1.91953	0.389105
	0.502264	-0.007771		0.503432	0.163725		0.943086	0.008329		0.955297	-0.016203		-1.8902	0.140602		-1.91766	0.86442		-1.91889	0.387682
	0.502952	-0.006973		0.504121	0.163265		0.944377	0.007775		0.956604	-0.016664		-1.88951	0.139952		-1.91702	0.862999		-1.91825	0.387764
	0.503639	-0.006729		0.50481	0.163143		0.945667	0.006648		0.957912	-0.018183		-1.88883	0.139443		-1.91637	0.860626		-1.9176	0.386626
	0.504326	-0.006949		0.5055	0.16347		0.946959	0.006287		0.95922	-0.019583		-1.88814	0.139571		-1.91572	0.85872		-1.91696	0.385383
	0.505013	-0.006867		0.506189	0.16321		0.94825	0.006229		0.960528	-0.020618		-1.88746	0.139537		-1.91508	0.857059		-1.91632	0.383741
	0.505701	-0.006063		0.506879	0.162752		0.949541	0.007721		0.961836	-0.020754		-1.88678	0.138752		-1.91443	0.855248		-1.91568	0.382719
	0.506388	-0.005213		0.507568	0.1622		0.950831	0.008461		0.963144	-0.020156		-1.88609	0.138073		-1.91379	0.8539		-1.91503	0.381591
	0.507076	-0.005778		0.508257	0.161813		0.952123	0.007739		0.964452	-0.018763		-1.88541	0.138302		-1.91314	0.85199		-1.91439	0.381474
	0.507763	-0.00548		0.508947	0.16145		0.953414	0.007489		0.96576	-0.019079		-1.88472	0.138817		-1.9125	0.849865		-1.91375	0.380412
	0.50845	-0.00427		0.509636	0.161564		0.954704	0.008221		0.967067	-0.018496		-1.88404	0.138451		-1.91185	0.848116		-1.91311	0.379851
	0.509138	-0.003961		0.510325	0.160992		0.955996	0.008305		0.968375	-0.018237		-1.88336	0.138152		-1.9112	0.847078		-1.91246	0.379123
	0.509825	-0.004167		0.511015	0.161037		0.957287	0.008235		0.969683	-0.019412		-1.88267	0.13691		-1.91056	0.84537		-1.91182	0.377974
	0.510512	-0.003925		0.511704	0.160391		0.958578	0.00921		0.970991	-0.020068		-1.88199	0.135551		-1.90991	0.844674		-1.91118	0.377474
	0.511199	-0.003311		0.512393	0.160287		0.959868	0.009987		0.972299	-0.020125		-1.88131	0.134772		-1.90927	0.843145		-1.91054	0.376247
	0.511887	-0.002835		0.513083	0.159077		0.96116	0.009749		0.973607	-0.0198		-1.88062	0.134852		-1.90862	0.840331		-1.90989	0.374925
	0.512574	-0.001287		0.513772	0.158033		0.962451	0.010259		0.974915	-0.018861		-1.87994	0.134449		-1.90797	0.837961		-1.90925	0.37411
	0.513262	-0.000154		0.514462	0.156853		0.963742	0.009582		0.976223	-0.01836		-1.87925	0.134911		-1.90733	0.836501		-1.90861	0.371815
	0.513949	0.000604		0.515151	0.156133		0.965033	0.008786		0.97753	-0.018268		-1.87857	0.135087		-1.90668	0.834981		-1.90797	0.370461
	0.514636	0.001388		0.515841	0.154671		0.966324	0.009263		0.978838	-0.018562		-1.87789	0.134517		-1.90604	0.834186		-1.90732	0.368558
	0.515324	0.001513		0.51653	0.155231		0.967615	0.010017		0.980146	-0.017856		-1.8772	0.13308		-1.90539	0.831962		-1.90668	0.367444
	0.516011	0.001949		0.517219	0.154453		0.968905	0.010788		0.981454	-0.018421		-1.87652	0.131423		-1.90475	0.830968		-1.90604	0.368243
	0.516698	0.002497		0.517909	0.153946		0.970197	0.01213		0.982762	-0.017771		-1.87583	0.130048		-1.9041	0.830512		-1.9054	0.36668
	0.517385	0.002164		0.518598	0.151959		0.971488	0.012241		0.98407	-0.016151		-1.87515	0.128649		-1.90345	0.828874		-1.90475	0.366036
	0.518073	0.002047		0.519287	0.15227		0.972779	0.012563		0.985378	-0.015538		-1.87447	0.128037		-1.90281	0.827382		-1.90411	0.364478
	0.51876	0.002044		0.519977	0.151		0.97407	0.012578		0.986686	-0.016929		-1.87378	0.128012		-1.90216	0.825535		-1.90347	0.364577
	0.519448	0.001874		0.520666	0.149796		0.975361	0.012164		0.987993	-0.015192		-1.8731	0.127637		-1.90152	0.823953		-1.90283	0.365226
	0.520135	0.002487		0.521356	0.148874		0.976652	0.012071		0.989301	-0.014574		-1.87242	0.126742		-1.90087	0.82233		-1.90219	0.364632
	0.520822	0.002787		0.522045	0.147678		0.977942	0.01251		0.990609	-0.014608		-1.87173	0.126205		-1.90023	0.820916		-1.90154	0.364039
	0.52151	0.002576		0.522734	0.146789		0.979234	0.012629		0.991917	-0.013617		-1.87105	0.125892		-1.89958	0.819136		-1.9009	0.363021
	0.522197	0.002452		0.523424	0.146244		0.980525	0.011566		0.993225	-0.012433		-1.87037	0.125791		-1.89894	0.81825		-1.90026	0.363891
	0.522884	0.002331		0.524113	0.145588		0.981816	0.010586		0.994533	-0.013354		-1.86968	0.126414		-1.89829	0.816473		-1.89962	0.362339
	0.523571	0.002066		0.524802	0.144808		0.983107	0.009905		0.995841	-0.01453		-1.869	0.127104		-1.89764	0.815292		-1.89897	0.361329
	0.524259	0.002205		0.525492	0.144676		0.984398	0.009952		0.997149	-0.015014		-1.86831	0.127379		-1.897	0.814163		-1.89833	0.360547
	0.524946	0.002295		0.526181	0.144561		0.985689	0.009373		0.998456	-0.01394		-1.86763	0.128279		-1.89635	0.813026		-1.89769	0.360427
	0.525634	0.00203		0.526871	0.144282		0.986979	0.008673		0.999764	-0.013871		-1.86695	0.128066		-1.89571	0.81164		-1.89705	0.360173
	0.526321	0.001898		0.52756	0.143828		0.988271	0.008685		1.00107	-0.013288		-1.86626	0.12872		-1.89506	0.810966		-1.8964	0.359466
	0.527008	0.001523		0.528249	0.143705		0.989562	0.008871		1.00238	-0.012395		-1.86558	0.127131		-1.89441	0.809511		-1.89576	0.358428
	0.527696	0.000487		0.528939	0.143565		0.990853	0.008447		1.00369	-0.010903		-1.86489	0.126885		-1.89377	0.808178		-1.89512	0.356697
	0.528383	-0.00022		0.529628	0.143561		0.992144	0.00875		1.005	-0.010492		-1.86421	0.126743		-1.89312	0.806644		-1.89447	0.355974
	0.52907	-0.00073		0.530318	0.143853		0.993435	0.00848		1.0063	-0.012137		-1.86353	0.127391		-1.89248	0.805304		-1.89383	0.355854
	0.529757	-0.001998		0.531007	0.143585		0.994726	0.007761		1.00761	-0.011922		-1.86284	0.127222		-1.89183	0.803834		-1.89319	0.355168
	0.530445	-0.002519		0.531696	0.143297		0.996017	0.008214		1.00892	-0.011597		-1.86216	0.127374		-1.89118	0.801608		-1.89255	0.354694
	0.531132	-0.002904		0.532386	0.142461		0.997308	0.008647		1.01023	-0.012225		-1.86147	0.127343		-1.89054	0.799501		-1.89191	0.353476
	0.53182	-0.003576		0.533075	0.141289		0.998599	0.007426		1.01154	-0.012943		-1.86079	0.125979		-1.88989	0.798512		-1.89126	0.353442
	0.532507	-0.00333		0.533764	0.140528		0.99989	0.006735		1.01284	-0.013358		-1.86011	0.124277		-1.88925	0.79749		-1.89062	0.351904
	0.533194	-0.004495		0.534454	0.13961		1.00118	0.005297		1.01415	-0.011979		-1.85942	0.123272		-1.8886	0.796544		-1.88998	0.351114
	0.533882	-0.00467		0.535143	0.139206		1.00247	0.00334		1.01546	-0.011706		-1.85874	0.123989		-1.88796	0.795629		-1.88934	0.350561
	0.534569	-0.004573		0.535833	0.138679		1.00376	0.003149		1.01677	-0.012904		-1.85806	0.12327		-1.88731	0.79362		-1.88869	0.349609
	0.535256	-0.004352		0.536522	0.138552		1.00505	0.002913		1.01808	-0.014275		-1.85737	0.122421		-1.88667	0.791032		-1.88805	0.34891
	0.535944	-0.004958		0.537211	0.13892		1.00635	0.003193		1.01938	-0.013907		-1.85669	0.122162		-1.88602	0.788664		-1.88741	0.347716
	0.536631	-0.004323		0.537901	0.139475		1.00764	0.002209		1.02069	-0.013751		-1.856	0.122119		-1.88537	0.787057		-1.88677	0.346858
	0.537318	-0.004969		0.53859	0.139586		1.00893	0.001907		1.022	-0.015424		-1.85532	0.121943		-1.88473	0.786426		-1.88612	0.345153
	0.538006	-0.004769		0.539279	0.139079		1.01022	0.001999		1.02331	-0.016415		-1.85464	0.121933		-1.88408	0.784828		-1.88548	0.343829
	0.538693	-0.004881		0.539969	0.138599		1.01151	0.002804		1.02461	-0.017077		-1.85395	0.121248		-1.88344	0.782396		-1.88484	0.342716
	0.53938	-0.006264		0.540658	0.138204		1.0128	0.00316		1.02592	-0.017786		-1.85327	0.120827		-1.88279	0.780467		-1.8842	0.341662
	0.540068	-0.006012		0.541348	0.137422		1.01409	0.003273		1.02723	-0.017342		-1.85258	0.120375		-1.88214	0.778463		-1.88355	0.340565
	0.540755	-0.006136		0.542037	0.135852		1.01538	0.004054		1.02854	-0.017598		-1.8519	0.119487		-1.8815	0.776604		-1.88291	0.341158
	0.541442	-0.006072		0.542727	0.135256		1.01667	0.004355		1.02984	-0.018483		-1.85122	0.118778		-1.88085	0.775513		-1.88227	0.339952
	0.54213	-0.00599		0.543416	0.134754		1.01796	0.004743		1.03115	-0.018556		-1.85053	0.117405		-1.88021	0.774359		-1.88163	0.339051
	0.542817	-0.006403		0.544105	0.134331		1.01926	0.005369		1.03246	-0.019437		-1.84985	0.116619		-1.87956	0.772767		-1.88098	0.337164
	0.543504	-0.006741		0.544795	0.133979		1.02055	0.00554		1.03377	-0.019921		-1.84917	0.116112		-1.87892	0.771266		-1.88034	0.335795
	0.544192	-0.006457		0.545484	0.133811		1.02184	0.005335		1.03508	-0.019979		-1.84848	0.115496		-1.87827	0.769905		-1.8797	0.335107
	0.544879	-0.007797		0.546173	0.133764		1.02313	0.005205		1.03638	-0.02067		-1.8478	0.115121		-1.87763	0.768235		-1.87906	0.334395
	0.545566	-0.008537		0.546863	0.132581		1.02442	0.004813		1.03769	-0.021015		-1.84711	0.113972		-1.87698	0.766988		-1.87841	0.333703
	0.546254	-0.009032		0.547552	0.132895		1.02571	0.003796		1.039	-0.02079		-1.84643	0.113151		-1.87633	0.765509		-1.87777	0.333806
	0.546941	-0.009851		0.548241	0.13261		1.027	0.004241		1.04031	-0.020775		-1.84575	0.112534		-1.87569	0.763829		-1.87713	0.333292
	0.547628	-0.010166		0.548931	0.132475		1.02829	0.004785		1.04162	-0.021958		-1.84506	0.111667		-1.87504	0.762667		-1.87649	0.333048
	0.548316	-0.011064		0.54962	0.132705		1.02958	0.0044		1.04292	-0.021387		-1.84438	0.110901		-1.8744	0.76039		-1.87584	0.332531
	0.549003	-0.01232		0.55031	0.134403		1.03087	0.004731		1.04423	-0.022166		-1.8437	0.110164		-1.87375	0.758342		-1.8752	0.332242
	0.54969	-0.013322		0.550999	0.133823		1.03217	0.005516		1.04554	-0.023171		-1.84301	0.109585		-1.8731	0.757026		-1.87456	0.331117
	0.550378	-0.014494		0.551688	0.133946		1.03346	0.006666		1.04685	-0.023625		-1.84233	0.109647		-1.87246	0.754654		-1.87392	0.329398
	0.551065	-0.01488		0.552378	0.13359		1.03475	0.007465		1.04816	-0.024656		-1.84164	0.109604		-1.87181	0.753189		-1.87328	0.328777
	0.551752	-0.014615		0.553067	0.13408		1.03604	0.007484		1.04946	-0.024555		-1.84096	0.109716		-1.87117	0.752602		-1.87263	0.327463
	0.55244	-0.014524		0.553756	0.135464		1.03733	0.008015		1.05077	-0.025093		-1.84028	0.109536		-1.87052	0.751627		-1.87199	0.327351
	0.553127	-0.015003		0.554446	0.135747		1.03862	0.007571		1.05208	-0.025161		-1.83959	0.108351		-1.86987	0.750581		-1.87135	0.325891
	0.553814	-0.015751		0.555135	0.136443		1.03991	0.008676		1.05339	-0.026255		-1.83891	0.107674		-1.86923	0.749392		-1.87071	0.32554
	0.554502	-0.016903		0.555825	0.136864		1.0412	0.009627		1.05469	-0.024718		-1.83822	0.107457		-1.86858	0.74801		-1.87006	0.324917
	0.555189	-0.017078		0.556514	0.137663		1.04249	0.009384		1.056	-0.024039		-1.83754	0.106429		-1.86794	0.746672		-1.86942	0.324025
	0.555876	-0.016884		0.557204	0.137202		1.04378	0.008102		1.05731	-0.024713		-1.83686	0.10532		-1.86729	0.74468		-1.86878	0.323381
	0.556564	-0.016329		0.557893	0.137797		1.04507	0.008415		1.05862	-0.026514		-1.83617	0.104327		-1.86665	0.743238		-1.86814	0.321131
	0.557251	-0.015978		0.558582	0.13723		1.04637	0.008355		1.05993	-0.027203		-1.83549	0.103122		-1.866	0.742148		-1.86749	0.32046
	0.557938	-0.015761		0.559272	0.13699		1.04766	0.007591		1.06123	-0.026512		-1.83481	0.102618		-1.86536	0.741479		-1.86685	0.320259
	0.558626	-0.015773		0.559961	0.136674		1.04895	0.007472		1.06254	-0.026315		-1.83412	0.102167		-1.86471	0.740121		-1.86621	0.31975
	0.559313	-0.015672		0.56065	0.135834		1.05024	0.006904		1.06385	-0.026913		-1.83344	0.101547		-1.86406	0.73892		-1.86557	0.317728
	0.56	-0.015566		0.56134	0.135066		1.05153	0.007209		1.06516	-0.026489		-1.83275	0.101479		-1.86342	0.736843		-1.86492	0.316067
	0.560688	-0.015361		0.562029	0.134513		1.05282	0.008806		1.06647	-0.026441		-1.83207	0.102102		-1.86277	0.735471		-1.86428	0.315284
	0.561375	-0.014749		0.562719	0.133924		1.05411	0.008915		1.06777	-0.02742		-1.83139	0.10164		-1.86213	0.733279		-1.86364	0.314223
	0.562062	-0.014145		0.563408	0.133613		1.0554	0.009144		1.06908	-0.027735		-1.8307	0.100685		-1.86148	0.731849		-1.863	0.314231
	0.56275	-0.014138		0.564097	0.13285		1.05669	0.010338		1.07039	-0.02827		-1.83002	0.099565		-1.86084	0.731382		-1.86235	0.313058
	0.563437	-0.014289		0.564787	0.132542		1.05798	0.010514		1.0717	-0.027273		-1.82933	0.099661		-1.86019	0.730357		-1.86171	0.312293
	0.564124	-0.014263		0.565476	0.13211		1.05928	0.009922		1.073	-0.02762		-1.82865	0.099296		-1.85954	0.729461		-1.86107	0.311161
	0.564812	-0.013966		0.566165	0.13151		1.06057	0.01002		1.07431	-0.026967		-1.82797	0.09889		-1.8589	0.727997		-1.86043	0.310135
	0.565499	-0.013668		0.566855	0.131394		1.06186	0.010361		1.07562	-0.027666		-1.82728	0.098935		-1.85825	0.726055		-1.85978	0.309012
	0.566186	-0.014296		0.567544	0.131401		1.06315	0.010336		1.07693	-0.027385		-1.8266	0.099299		-1.85761	0.724563		-1.85914	0.308254
	0.566874	-0.014805		0.568233	0.131288		1.06444	0.010288		1.07824	-0.02721		-1.82591	0.099641		-1.85696	0.723283		-1.8585	0.307972
	0.567561	-0.014249		0.568923	0.130979		1.06573	0.011122		1.07954	-0.027093		-1.82523	0.098989		-1.85631	0.721861		-1.85786	0.306656
	0.568248	-0.014242		0.569612	0.131521		1.06702	0.011409		1.08085	-0.027546		-1.82455	0.098551		-1.85567	0.720609		-1.85721	0.30544
	0.568936	-0.014238		0.570302	0.131172		1.06831	0.011254		1.08216	-0.027811		-1.82386	0.098059		-1.85502	0.720178		-1.85657	0.303297
	0.569623	-0.014153		0.570991	0.130068		1.0696	0.012543		1.08347	-0.02665		-1.82318	0.097781		-1.85438	0.719842		-1.85593	0.302513
	0.57031	-0.013434		0.571681	0.129583		1.07089	0.01324		1.08478	-0.026749		-1.8225	0.096912		-1.85373	0.718257		-1.85529	0.30243
	0.570998	-0.013297		0.57237	0.130152		1.07219	0.01438		1.08608	-0.025248		-1.82181	0.095869		-1.85309	0.716472		-1.85465	0.301818
	0.571685	-0.013023		0.573059	0.130003		1.07348	0.014463		1.08739	-0.025552		-1.82113	0.094881		-1.85244	0.715741		-1.854	0.300711
	0.572372	-0.013068		0.573749	0.129112		1.07477	0.015353		1.0887	-0.025642		-1.82044	0.093917		-1.85179	0.714742		-1.85336	0.299846
	0.57306	-0.011904		0.574438	0.128704		1.07606	0.01785		1.09001	-0.026081		-1.81976	0.093635		-1.85115	0.714533		-1.85272	0.299624
	0.573747	-0.011016		0.575127	0.128627		1.07735	0.017785		1.09132	-0.025481		-1.81908	0.093231		-1.8505	0.71262		-1.85207	0.299078
	0.574434	-0.01129		0.575817	0.12854		1.07864	0.017923		1.09262	-0.025472		-1.81839	0.093102		-1.84986	0.711401		-1.85143	0.298761
	0.575122	-0.011386		0.576506	0.128675		1.07993	0.018779		1.09393	-0.026864		-1.81771	0.092393		-1.84921	0.710105		-1.85079	0.297163
	0.575809	-0.01118		0.577196	0.128735		1.08122	0.019687		1.09524	-0.027147		-1.81702	0.091812		-1.84857	0.708414		-1.85015	0.296095
	0.576496	-0.010971		0.577885	0.128506		1.08251	0.01978		1.09655	-0.026532		-1.81634	0.091844		-1.84792	0.707411		-1.8495	0.294887
	0.577184	-0.010818		0.578574	0.128383		1.0838	0.018979		1.09786	-0.026103		-1.81566	0.091376		-1.84727	0.706404		-1.84886	0.294967
	0.577871	-0.010655		0.579264	0.127923		1.0851	0.018238		1.09916	-0.025513		-1.81497	0.090604		-1.84663	0.70531		-1.84822	0.294013
	0.578558	-0.010386		0.579953	0.127083		1.08639	0.017419		1.10047	-0.024621		-1.81429	0.09029		-1.84598	0.704161		-1.84758	0.293207
	0.579246	-0.010819		0.580642	0.126563		1.08768	0.017422		1.10178	-0.025212		-1.81361	0.090501		-1.84534	0.702688		-1.84694	0.292102
	0.579933	-0.010914		0.581332	0.125889		1.08897	0.017643		1.10309	-0.026008		-1.81292	0.091208		-1.84469	0.701817		-1.84629	0.29126
	0.58062	-0.010779		0.582021	0.125523		1.09026	0.018098		1.10439	-0.028546		-1.81224	0.091133		-1.84404	0.700586		-1.84565	0.290424
	0.581308	-0.011408		0.582711	0.125006		1.09155	0.01792		1.1057	-0.02938		-1.81155	0.090782		-1.8434	0.698327		-1.84501	0.289246
	0.581995	-0.011456		0.5834	0.124412		1.09284	0.017941		1.10701	-0.029458		-1.81087	0.090627		-1.84275	0.696508		-1.84437	0.288672
	0.582682	-0.01075		0.584089	0.123859		1.09413	0.018109		1.10832	-0.029393		-1.81019	0.089557		-1.84211	0.694882		-1.84372	0.28757
	0.58337	-0.009899		0.584779	0.123574		1.09543	0.018197		1.10963	-0.028459		-1.8095	0.08913		-1.84146	0.692665		-1.84308	0.287551
	0.584057	-0.00878		0.585468	0.123369		1.09672	0.01802		1.11093	-0.027218		-1.80882	0.088845		-1.84082	0.690743		-1.84244	0.287275
	0.584744	-0.00799		0.586158	0.123078		1.09801	0.017591		1.11224	-0.028371		-1.80814	0.088641		-1.84017	0.688291		-1.8418	0.28682
	0.585432	-0.008285		0.586847	0.12251		1.0993	0.017737		1.11355	-0.027058		-1.80745	0.089022		-1.83953	0.68539		-1.84115	0.286796
	0.586119	-0.008957		0.587536	0.121106		1.10059	0.016767		1.11486	-0.027056		-1.80677	0.088196		-1.83888	0.683145		-1.84051	0.286693
	0.586806	-0.008653		0.588226	0.120633		1.10188	0.016589		1.11617	-0.027122		-1.80608	0.087777		-1.83823	0.681277		-1.83987	0.284809
	0.587494	-0.007977		0.588915	0.120451		1.10317	0.016354		1.11747	-0.027505		-1.8054	0.087563		-1.83759	0.678916		-1.83923	0.284468
	0.588181	-0.006924		0.589604	0.119979		1.10446	0.015011		1.11878	-0.028323		-1.80472	0.086225		-1.83694	0.677063		-1.83858	0.283672
	0.588868	-0.006097		0.590294	0.119481		1.10575	0.015401		1.12009	-0.029468		-1.80403	0.084988		-1.8363	0.675471		-1.83794	0.283174
	0.589556	-0.00501		0.590983	0.119699		1.10704	0.013588		1.1214	-0.029092		-1.80335	0.084067		-1.83565	0.67449		-1.8373	0.282522
	0.590243	-0.004733		0.591673	0.120023		1.10834	0.012978		1.1227	-0.029133		-1.80266	0.083788		-1.835	0.673051		-1.83666	0.282095
	0.59093	-0.004918		0.592362	0.120149		1.10963	0.012303		1.12401	-0.029171		-1.80198	0.083879		-1.83436	0.671385		-1.83601	0.281724
	0.591618	-0.005404		0.593051	0.120564		1.11092	0.01161		1.12532	-0.027688		-1.8013	0.083166		-1.83371	0.669287		-1.83537	0.280818
	0.592305	-0.005908		0.593741	0.120608		1.11221	0.011458		1.12663	-0.027242		-1.80061	0.082446		-1.83307	0.667722		-1.83473	0.279998
	0.592992	-0.005266		0.59443	0.12045		1.1135	0.011229		1.12794	-0.026067		-1.79993	0.081232		-1.83242	0.666403		-1.83409	0.27847
	0.59368	-0.004645		0.595119	0.11991		1.11479	0.011144		1.12924	-0.026548		-1.79924	0.081129		-1.83178	0.665417		-1.83344	0.279127
	0.594367	-0.004197		0.595809	0.120125		1.11608	0.010355		1.13055	-0.027937		-1.79856	0.079916		-1.83113	0.664101		-1.8328	0.278862
	0.595054	-0.004247		0.596498	0.120313		1.11737	0.01096		1.13186	-0.028627		-1.79788	0.078842		-1.83048	0.662662		-1.83216	0.278393
	0.595742	-0.004149		0.597188	0.120117		1.11866	0.010986		1.13317	-0.028684		-1.79719	0.078393		-1.82984	0.661369		-1.83152	0.277863
	0.596429	-0.004371		0.597877	0.119798		1.11995	0.010965		1.13447	-0.027976		-1.79651	0.078459		-1.82919	0.659578		-1.83088	0.277367
	0.597116	-0.004446		0.598567	0.119971		1.12124	0.011028		1.13578	-0.027317		-1.79583	0.077855		-1.82855	0.657891		-1.83023	0.277009
	0.597804	-0.0044		0.599256	0.119295		1.12254	0.011923		1.13709	-0.025865		-1.79514	0.077201		-1.8279	0.656761		-1.82959	0.275917
	0.598491	-0.004812		0.599945	0.11935		1.12383	0.012058		1.1384	-0.02638		-1.79446	0.07676		-1.82726	0.656046		-1.82895	0.274687
	0.599178	-0.004968		0.600635	0.119038		1.12512	0.011068		1.13971	-0.026619		-1.79377	0.076965		-1.82661	0.655075		-1.82831	0.274422
	0.599866	-0.004948		0.601324	0.118605		1.12641	0.010282		1.14101	-0.025897		-1.79309	0.076083		-1.82596	0.653561		-1.82766	0.274716
	0.600553	-0.004608		0.602013	0.118685		1.1277	0.010378		1.14232	-0.02688		-1.79241	0.074835		-1.82532	0.652341		-1.82702	0.273869
	0.60124	-0.004733		0.602703	0.118297		1.12899	0.009919		1.14363	-0.028058		-1.79172	0.073723		-1.82467	0.650385		-1.82638	0.273169
	0.601928	-0.004947		0.603392	0.118995		1.13028	0.009759		1.14494	-0.02867		-1.79104	0.072711		-1.82403	0.648715		-1.82574	0.273009
	0.602615	-0.004665		0.604081	0.117892		1.13157	0.010243		1.14625	-0.029118		-1.79035	0.072557		-1.82338	0.647921		-1.82509	0.27264
	0.603302	-0.004182		0.604771	0.117902		1.13286	0.01097		1.14755	-0.029435		-1.78967	0.073211		-1.82273	0.646363		-1.82445	0.273556
	0.60399	-0.004844		0.60546	0.118014		1.13415	0.010757		1.14886	-0.029827		-1.78899	0.072498		-1.82209	0.64585		-1.82381	0.273522
	0.604677	-0.005034		0.60615	0.117652		1.13545	0.010442		1.15017	-0.029765		-1.7883	0.073218		-1.82144	0.645415		-1.82316	0.272192
	0.605364	-0.005534		0.606839	0.117146		1.13674	0.011683		1.15148	-0.030024		-1.78762	0.072344		-1.8208	0.644668		-1.82252	0.270909
	0.606052	-0.005049		0.607528	0.117543		1.13803	0.010901		1.15279	-0.029708		-1.78694	0.07228		-1.82015	0.644391		-1.82188	0.270526
	0.606739	-0.00545		0.608218	0.117259		1.13932	0.010906		1.15409	-0.029354		-1.78625	0.072432		-1.81951	0.643241		-1.82124	0.269731
	0.607426	-0.006176		0.608907	0.116928		1.14061	0.011985		1.1554	-0.028641		-1.78557	0.070968		-1.81886	0.642791		-1.8206	0.268559
	0.608114	-0.006254		0.609596	0.116382		1.1419	0.013073		1.15671	-0.029066		-1.78489	0.070688		-1.81821	0.641638		-1.81995	0.268056
	0.608801	-0.006513		0.610286	0.116882		1.14319	0.013456		1.15802	-0.031262		-1.7842	0.069968		-1.81757	0.639727		-1.81931	0.266767
	0.609488	-0.00678		0.610975	0.116161		1.14448	0.012517		1.15932	-0.03079		-1.78352	0.069886		-1.81692	0.637902		-1.81867	0.266404
	0.610176	-0.007839		0.611665	0.116091		1.14577	0.012551		1.16063	-0.030613		-1.78283	0.069226		-1.81628	0.63646		-1.81803	0.266147
	0.610863	-0.008443		0.612354	0.11609		1.14706	0.013068		1.16194	-0.030641		-1.78215	0.068545		-1.81563	0.634085		-1.81738	0.266155
	0.61155	-0.009043		0.613044	0.115352		1.14836	0.013071		1.16325	-0.031185		-1.78147	0.067843		-1.81499	0.632438		-1.81674	0.265975
	0.612238	-0.009566		0.613733	0.115578		1.14965	0.013238		1.16456	-0.030349		-1.78078	0.068114		-1.81434	0.630572		-1.8161	0.266207
	0.612925	-0.009844		0.614422	0.115322		1.15094	0.013194		1.16586	-0.03041		-1.7801	0.067157		-1.81369	0.62967		-1.81546	0.265736
	0.613612	-0.009281		0.615112	0.115978		1.15223	0.011469		1.16717	-0.030907		-1.77941	0.066725		-1.81305	0.627803		-1.81481	0.265455
	0.6143	-0.009997		0.615801	0.115646		1.15352	0.011157		1.16848	-0.031041		-1.77873	0.065775		-1.8124	0.626566		-1.81417	0.265064
	0.614987	-0.009718		0.61649	0.114777		1.15481	0.009462		1.16979	-0.03122		-1.77805	0.065386		-1.81176	0.625235		-1.81353	0.264429
	0.615674	-0.009415		0.61718	0.114912		1.1561	0.010286		1.1711	-0.031045		-1.77736	0.065107		-1.81111	0.623692		-1.81289	0.263919
	0.616362	-0.010071		0.617869	0.114556		1.15739	0.011481		1.1724	-0.031222		-1.77668	0.064137		-1.81047	0.622329		-1.81224	0.263202
	0.617049	-0.009463		0.618559	0.113874		1.15868	0.012813		1.17371	-0.032299		-1.77599	0.063784		-1.80982	0.621444		-1.8116	0.262666
	0.617736	-0.009811		0.619248	0.113485		1.15997	0.012082		1.17502	-0.033373		-1.77531	0.063374		-1.80917	0.620567		-1.81096	0.261979
	0.618424	-0.009961		0.619937	0.113116		1.16126	0.010987		1.17633	-0.03378		-1.77463	0.063998		-1.80853	0.619805		-1.81032	0.260678
	0.619111	-0.010048		0.620627	0.112714		1.16256	0.01091		1.17763	-0.033452		-1.77394	0.06356		-1.80788	0.61864		-1.80967	0.260132
	0.619798	-0.010069		0.621316	0.112891		1.16385	0.009739		1.17894	-0.033321		-1.77326	0.063289		-1.80724	0.618012		-1.80903	0.259631
	0.620486	-0.009757		0.622005	0.112309		1.16514	0.009683		1.18025	-0.033295		-1.77258	0.063989		-1.80659	0.617447		-1.80839	0.258949
	0.621173	-0.010104		0.622695	0.110787		1.16643	0.009496		1.18156	-0.032571		-1.77189	0.063448		-1.80594	0.616338		-1.80775	0.25896
	0.621861	-0.011011		0.623384	0.110352		1.16772	0.009031		1.18287	-0.033203		-1.77121	0.062989		-1.8053	0.615557		-1.8071	0.259012
	0.622548	-0.012079		0.624074	0.110317		1.16901	0.009002		1.18417	-0.03344		-1.77052	0.064227		-1.80465	0.614353		-1.80646	0.258771
	0.623235	-0.012457		0.624763	0.110265		1.1703	0.00913		1.18548	-0.033539		-1.76984	0.064914		-1.80401	0.613668		-1.80582	0.258112
	0.623922	-0.012759		0.625452	0.109558		1.17159	0.00909		1.18679	-0.032897		-1.76916	0.065529		-1.80336	0.611684		-1.80518	0.256949
	0.62461	-0.013339		0.626142	0.108852		1.17288	0.006853		1.1881	-0.033537		-1.76847	0.064488		-1.80272	0.61009		-1.80454	0.256312
	0.625297	-0.013131		0.626831	0.108996		1.17418	0.005218		1.18941	-0.034137		-1.76779	0.063289		-1.80207	0.608486		-1.80389	0.255974
	0.625984	-0.012532		0.627521	0.109081		1.17547	0.004457		1.19071	-0.032992		-1.7671	0.062091		-1.80143	0.607347		-1.80325	0.255861
	0.626672	-0.012282		0.62821	0.108629		1.17676	0.004173		1.19202	-0.033412		-1.76642	0.061664		-1.80078	0.605524		-1.80261	0.255618
	0.627359	-0.012699		0.628899	0.108217		1.17805	0.004547		1.19333	-0.034437		-1.76574	0.061405		-1.80013	0.603299		-1.80197	0.255235
	0.628047	-0.01334		0.629589	0.107896		1.17934	0.004261		1.19464	-0.035554		-1.76505	0.060271		-1.79949	0.602079		-1.80132	0.254686
	0.628734	-0.013795		0.630278	0.107891		1.18063	0.003716		1.19595	-0.03562		-1.76437	0.059303		-1.79884	0.60108		-1.80068	0.253886
	0.629421	-0.013842		0.630967	0.108242		1.18192	0.002451		1.19725	-0.036603		-1.76369	0.058588		-1.7982	0.600439		-1.80004	0.253786
	0.630108	-0.013344		0.631657	0.108411		1.18321	0.002145		1.19856	-0.037919		-1.763	0.058145		-1.79755	0.599276		-1.7994	0.253377
	0.630796	-0.013361		0.632346	0.10788		1.1845	0.002489		1.19987	-0.037367		-1.76232	0.058122		-1.7969	0.597689		-1.79875	0.25301
	0.631483	-0.013331		0.633036	0.107248		1.18579	0.001898		1.20118	-0.037097		-1.76163	0.058379		-1.79626	0.596154		-1.79811	0.252837
	0.63217	-0.012976		0.633725	0.107069		1.18709	0.001651		1.20249	-0.037429		-1.76095	0.058466		-1.79561	0.594312		-1.79747	0.252732
	0.632858	-0.012019		0.634414	0.105789		1.18838	0.001407		1.20379	-0.038379		-1.76027	0.058186		-1.79497	0.592816		-1.79683	0.252844
	0.633545	-0.010884		0.635104	0.105947		1.18967	0.001164		1.2051	-0.039269		-1.75958	0.058007		-1.79432	0.592169		-1.79618	0.252983
	0.634233	-0.010766		0.635793	0.105809		1.19096	0.00043		1.20641	-0.038028		-1.7589	0.0579		-1.79368	0.590732		-1.79554	0.252136
	0.63492	-0.011346		0.636482	0.105871		1.19225	0.001357		1.20772	-0.036758		-1.75822	0.057591		-1.79303	0.589384		-1.7949	0.251516
	0.635607	-0.011541		0.637172	0.105626		1.19354	0.001407		1.20902	-0.035834		-1.75753	0.057215		-1.79238	0.588224		-1.79426	0.251278
	0.636294	-0.011492		0.637861	0.104249		1.19483	0.001196		1.21033	-0.035917		-1.75685	0.05692		-1.79174	0.58678		-1.79361	0.251012
	0.636982	-0.012423		0.638551	0.104302		1.19612	0.001413		1.21164	-0.035643		-1.75616	0.056034		-1.79109	0.585374		-1.79297	0.251099
	0.637669	-0.013588		0.63924	0.104323		1.19741	0.000869		1.21295	-0.035688		-1.75548	0.054645		-1.79045	0.583657		-1.79233	0.250668
	0.638356	-0.014195		0.639929	0.104535		1.1987	0.000894		1.21426	-0.035566		-1.7548	0.053233		-1.7898	0.582221		-1.79169	0.249375
	0.639044	-0.014434		0.640619	0.103657		1.2	0.000779		1.21556	-0.034365		-1.75411	0.052093		-1.78916	0.580757		-1.79104	0.248654
	0.639731	-0.015092		0.641308	0.10293		1.20129	0.000487		1.21687	-0.034314		-1.75343	0.051232		-1.78851	0.579218		-1.7904	0.248814
	0.640419	-0.014915		0.641998	0.102785		1.20258	0.000324		1.21818	-0.03363		-1.75274	0.050511		-1.78786	0.577251		-1.78976	0.248967
	0.641106	-0.014913		0.642687	0.103131		1.20387	0.001198		1.21949	-0.033792		-1.75206	0.04917		-1.78722	0.575372		-1.78912	0.249034
	0.641793	-0.014792		0.643376	0.10307		1.20516	0.002546		1.2208	-0.033617		-1.75138	0.048514		-1.78657	0.574176		-1.78847	0.249506
	0.64248	-0.014325		0.644066	0.103553		1.20645	0.003106		1.2221	-0.03305		-1.75069	0.047674		-1.78593	0.573315		-1.78783	0.249747
	0.643168	-0.014238		0.644755	0.103006		1.20774	0.003184		1.22341	-0.031934		-1.75001	0.046867		-1.78528	0.573246		-1.78719	0.24962
	0.643855	-0.014022		0.645444	0.102862		1.20903	0.00333		1.22472	-0.03209		-1.74933	0.046352		-1.78463	0.571781		-1.78655	0.249072
	0.644542	-0.013474		0.646134	0.102779		1.21032	0.003644		1.22603	-0.031394		-1.74864	0.046107		-1.78399	0.570693		-1.7859	0.248536
	0.64523	-0.013759		0.646823	0.10214		1.21162	0.004679		1.22733	-0.030205		-1.74796	0.045538		-1.78334	0.569004		-1.78526	0.248398
	0.645917	-0.01164		0.647513	0.102566		1.21291	0.006247		1.22864	-0.028959		-1.74727	0.04511		-1.7827	0.567819		-1.78462	0.247928
	0.646605	-0.011982		0.648202	0.102668		1.2142	0.007237		1.22995	-0.027069		-1.74659	0.044325		-1.78205	0.566729		-1.78398	0.246993
	0.647292	-0.011423		0.648891	0.102962		1.21549	0.007425		1.23126	-0.026074		-1.74591	0.044568		-1.78141	0.565987		-1.78333	0.246106
	0.647979	-0.01129		0.649581	0.102728		1.21678	0.007818		1.23257	-0.026275		-1.74522	0.044115		-1.78076	0.564251		-1.78269	0.245337
	0.648666	-0.011316		0.65027	0.103173		1.21807	0.008713		1.23387	-0.026029		-1.74454	0.043329		-1.78011	0.564288		-1.78205	0.244924
	0.649354	-0.012547		0.650959	0.103206		1.21936	0.008827		1.23518	-0.025172		-1.74385	0.042647		-1.77947	0.564094		-1.78141	0.244554
	0.650041	-0.012222		0.651649	0.102836		1.22065	0.007674		1.23649	-0.024579		-1.74317	0.041816		-1.77882	0.56304		-1.78076	0.244091
	0.650728	-0.011904		0.652338	0.102918		1.22194	0.008387		1.2378	-0.024479		-1.74249	0.041152		-1.77818	0.56249		-1.78012	0.244187
	0.651416	-0.012044		0.653028	0.103748		1.22323	0.00827		1.2391	-0.025441		-1.7418	0.040764		-1.77753	0.562249		-1.77948	0.244221
	0.652103	-0.011192		0.653717	0.103608		1.22453	0.008511		1.24041	-0.026668		-1.74112	0.040032		-1.77689	0.561402		-1.77884	0.244467
	0.652791	-0.011828		0.654407	0.103162		1.22582	0.009091		1.24172	-0.02677		-1.74043	0.03906		-1.77624	0.560741		-1.77819	0.244219
	0.653478	-0.012033		0.655096	0.103136		1.22711	0.008952		1.24303	-0.027513		-1.73975	0.037958		-1.77559	0.559821		-1.77755	0.243376
	0.654165	-0.011796		0.655785	0.103629		1.2284	0.00827		1.24434	-0.028606		-1.73907	0.036626		-1.77495	0.558409		-1.77691	0.242968
	0.654852	-0.011858		0.656475	0.104327		1.22969	0.008488		1.24564	-0.029113		-1.73838	0.03597		-1.7743	0.557291		-1.77627	0.242154
	0.65554	-0.011174		0.657164	0.104669		1.23098	0.007979		1.24695	-0.029353		-1.7377	0.035565		-1.77366	0.556073		-1.77563	0.241587
	0.656227	-0.010209		0.657853	0.104512		1.23227	0.006871		1.24826	-0.028281		-1.73702	0.03611		-1.77301	0.554805		-1.77498	0.24138
	0.656914	-0.009109		0.658543	0.103982		1.23356	0.006626		1.24957	-0.028295		-1.73633	0.035101		-1.77237	0.553044		-1.77434	0.240576
	0.657602	-0.00909		0.659232	0.103229		1.23485	0.005766		1.25088	-0.029298		-1.73565	0.034015		-1.77172	0.551968		-1.7737	0.240144
	0.658289	-0.008577		0.659921	0.102435		1.23614	0.004075		1.25218	-0.029317		-1.73496	0.032566		-1.77107	0.55154		-1.77306	0.240394
	0.658977	-0.008221		0.660611	0.102136		1.23744	0.003515		1.25349	-0.029049		-1.73428	0.033131		-1.77043	0.551141		-1.77241	0.24054
	0.659664	-0.008893		0.6613	0.101701		1.23873	0.004008		1.2548	-0.02922		-1.7336	0.033042		-1.76978	0.549598		-1.77177	0.240633
	0.660351	-0.009853		0.66199	0.101447		1.24002	0.0046		1.25611	-0.030164		-1.73291	0.033847		-1.76914	0.548532		-1.77113	0.240275
	0.661038	-0.009624		0.662679	0.101656		1.24131	0.004606		1.25741	-0.030759		-1.73223	0.032657		-1.76849	0.548406		-1.77049	0.239649
	0.661726	-0.009717		0.663368	0.10212		1.2426	0.003763		1.25872	-0.031242		-1.73154	0.031945		-1.76785	0.548062		-1.76984	0.239004
	0.662413	-0.010485		0.664058	0.101552		1.24389	0.002917		1.26003	-0.031463		-1.73086	0.032489		-1.7672	0.547957		-1.7692	0.238386
	0.6631	-0.010851		0.664747	0.100505		1.24518	0.00294		1.26134	-0.031828		-1.73018	0.03239		-1.76655	0.547093		-1.76856	0.237929
	0.663788	-0.011153		0.665437	0.099801		1.24647	0.002722		1.26265	-0.032993		-1.72949	0.032251		-1.76591	0.54653		-1.76792	0.237726
	0.664475	-0.010838		0.666126	0.099794		1.24776	0.002613		1.26395	-0.033375		-1.72881	0.031582		-1.76526	0.545965		-1.76727	0.237371
	0.665163	-0.01065		0.666815	0.099305		1.24905	0.002429		1.26526	-0.034395		-1.72813	0.029965		-1.76462	0.54517		-1.76663	0.236836
	0.66585	-0.010152		0.667505	0.099218		1.25035	0.00183		1.26657	-0.035432		-1.72744	0.029402		-1.76397	0.544485		-1.76599	0.235794
	0.666537	-0.010385		0.668194	0.100028		1.25164	0.001203		1.26788	-0.036661		-1.72676	0.029244		-1.76333	0.544014		-1.76535	0.234507
	0.667224	-0.011305		0.668884	0.099358		1.25293	0.000647		1.26919	-0.036245		-1.72607	0.028843		-1.76268	0.543733		-1.7647	0.233398
	0.667912	-0.01112		0.669573	0.099611		1.25422	-2.1e-05		1.27049	-0.035813		-1.72539	0.027922		-1.76203	0.542014		-1.76406	0.23231
	0.668599	-0.010065		0.670262	0.1004		1.25551	-0.000104		1.2718	-0.03665		-1.72471	0.027612		-1.76139	0.541404		-1.76342	0.231846
	0.669286	-0.009409		0.670952	0.100776		1.2568	-0.000186		1.27311	-0.036073		-1.72402	0.028291		-1.76074	0.539892		-1.76278	0.231467
	0.669974	-0.009391		0.671641	0.100359		1.25809	-0.000925		1.27442	-0.036649		-1.72334	0.027989		-1.7601	0.539314		-1.76213	0.230753
	0.670661	-0.009529		0.67233	0.0994		1.25938	-0.00141		1.27573	-0.036752		-1.72266	0.028156		-1.75945	0.538304		-1.76149	0.230092
	0.671349	-0.009549		0.67302	0.098652		1.26067	-0.001922		1.27703	-0.036565		-1.72197	0.028266		-1.7588	0.53762		-1.76085	0.229479
	0.672036	-0.009621		0.673709	0.097452		1.26196	-0.001891		1.27834	-0.035448		-1.72129	0.02892		-1.75816	0.536254		-1.76021	0.228471
	0.672723	-0.00948		0.674399	0.098159		1.26326	-0.000502		1.27965	-0.035789		-1.7206	0.029189		-1.75751	0.534914		-1.75957	0.227907
	0.67341	-0.009865		0.675088	0.098108		1.26455	-0.000117		1.28096	-0.037844		-1.71992	0.029889		-1.75687	0.533967		-1.75892	0.227621
	0.674098	-0.009161		0.675777	0.097479		1.26584	-0.000316		1.28226	-0.038539		-1.71924	0.030488		-1.75622	0.532315		-1.75828	0.226571
	0.674785	-0.009891		0.676467	0.097226		1.26713	-9.9e-05		1.28357	-0.038709		-1.71855	0.030941		-1.75558	0.531453		-1.75764	0.22512
	0.675472	-0.009952		0.677156	0.096902		1.26842	0.001092		1.28488	-0.039945		-1.71787	0.030955		-1.75493	0.530588		-1.757	0.223527
	0.67616	-0.009544		0.677845	0.097502		1.26971	0.0001		1.28619	-0.041047		-1.71718	0.030752		-1.75428	0.52979		-1.75635	0.222393
	0.676847	-0.010156		0.678535	0.09702		1.271	0.000449		1.2875	-0.041932		-1.7165	0.030674		-1.75364	0.528979		-1.75571	0.221211
	0.677535	-0.009419		0.679224	0.097145		1.27229	-0.000216		1.2888	-0.04285		-1.71582	0.031134		-1.75299	0.527997		-1.75507	0.220065
	0.678222	-0.009664		0.679914	0.096531		1.27358	-0.000292		1.29011	-0.042212		-1.71513	0.03162		-1.75235	0.527699		-1.75442	0.219291
	0.678909	-0.009486		0.680603	0.096227		1.27487	-0.000451		1.29142	-0.042526		-1.71445	0.03155		-1.7517	0.526642		-1.75378	0.218435
	0.679596	-0.009249		0.681292	0.095298		1.27616	-0.001373		1.29273	-0.042414		-1.71376	0.031338		-1.75106	0.525979		-1.75314	0.217312
	0.680284	-0.010369		0.681982	0.094401		1.27746	-0.002066		1.29404	-0.042705		-1.71308	0.032007		-1.75041	0.525209		-1.7525	0.216795
	0.680971	-0.009852		0.682671	0.093863		1.27875	-0.001779		1.29534	-0.043435		-1.7124	0.030978		-1.74976	0.52405		-1.75185	0.216349
	0.681659	-0.010245		0.683361	0.09421		1.28004	-0.002192		1.29665	-0.04314		-1.71171	0.029389		-1.74912	0.523034		-1.75121	0.215775
	0.682346	-0.01099		0.68405	0.093272		1.28133	-0.002587		1.29796	-0.042768		-1.71103	0.02927		-1.74847	0.521223		-1.75057	0.215345
	0.683033	-0.011125		0.684739	0.092383		1.28262	-0.003414		1.29927	-0.041672		-1.71035	0.029524		-1.74783	0.519644		-1.74993	0.214828
	0.683721	-0.01028		0.685429	0.091954		1.28391	-0.001901		1.30058	-0.041993		-1.70966	0.02953		-1.74718	0.518502		-1.74929	0.213843
	0.684408	-0.009489		0.686118	0.091966		1.2852	-0.001989		1.30188	-0.041939		-1.70898	0.029699		-1.74653	0.517229		-1.74864	0.213535
	0.685095	-0.009063		0.686807	0.090848		1.28649	-0.001809		1.30319	-0.043292		-1.70829	0.030099		-1.74589	0.51552		-1.748	0.212774
	0.685782	-0.00997		0.687497	0.090055		1.28778	-0.003415		1.3045	-0.043474		-1.70761	0.029743		-1.74524	0.514241		-1.74736	0.212566
	0.68647	-0.011		0.688186	0.089827		1.28907	-0.003784		1.30581	-0.044179		-1.70693	0.029712		-1.7446	0.513335		-1.74672	0.211939
	0.687157	-0.010736		0.688876	0.089668		1.29037	-0.004137		1.30712	-0.044717		-1.70624	0.029572		-1.74395	0.512691		-1.74607	0.211897
	0.687845	-0.011166		0.689565	0.088547		1.29166	-0.002796		1.30842	-0.043747		-1.70556	0.029604		-1.74331	0.511907		-1.74543	0.211861
	0.688532	-0.011379		0.690254	0.087459		1.29295	-0.001939		1.30973	-0.043465		-1.70487	0.030391		-1.74266	0.510896		-1.74479	0.211338
	0.689219	-0.011523		0.690944	0.087279		1.29424	-0.002565		1.31104	-0.044189		-1.70419	0.029988		-1.74202	0.51015		-1.74415	0.210432
	0.689907	-0.012396		0.691633	0.087006		1.29553	-0.003152		1.31235	-0.043458		-1.70351	0.029704		-1.74137	0.50992		-1.7435	0.210493
	0.690594	-0.013268		0.692322	0.086766		1.29682	-0.004081		1.31365	-0.043137		-1.70282	0.029131		-1.74072	0.510191		-1.74286	0.209193
	0.691281	-0.013807		0.693012	0.086134		1.29811	-0.004705		1.31496	-0.042797		-1.70214	0.028697		-1.74008	0.510261		-1.74222	0.208118
	0.691968	-0.013948		0.693701	0.086096		1.2994	-0.004216		1.31627	-0.042211		-1.70146	0.028375		-1.73943	0.509323		-1.74158	0.207245
	0.692656	-0.014047		0.694391	0.086418		1.30069	-0.003658		1.31758	-0.041791		-1.70077	0.027969		-1.73879	0.508013		-1.74093	0.20642
	0.693343	-0.014423		0.69508	0.085988		1.30199	-0.002083		1.31889	-0.041467		-1.70009	0.027865		-1.73814	0.507289		-1.74029	0.205196
	0.694031	-0.013889		0.695769	0.084874		1.30328	-0.002601		1.32019	-0.041569		-1.69941	0.027173		-1.7375	0.506613		-1.73965	0.203727
	0.694718	-0.013569		0.696459	0.084103		1.30457	-0.001939		1.3215	-0.042404		-1.69872	0.026417		-1.73685	0.505451		-1.73901	0.202491
	0.695405	-0.014074		0.697148	0.083752		1.30586	-0.001382		1.32281	-0.043192		-1.69804	0.02693		-1.7362	0.504051		-1.73836	0.201781
	0.696093	-0.014132		0.697838	0.083578		1.30715	-0.00048		1.32412	-0.043969		-1.69735	0.027836		-1.73556	0.502181		-1.73772	0.200923
	0.69678	-0.013316		0.698527	0.083295		1.30844	-0.000508		1.32543	-0.0442		-1.69667	0.027469		-1.73491	0.500041		-1.73708	0.200276
	0.697467	-0.013068		0.699216	0.082681		1.30973	-0.000775		1.32673	-0.044936		-1.69599	0.027427		-1.73427	0.498586		-1.73644	0.200651
	0.698154	-0.013715		0.699906	0.08253		1.31102	-0.000652		1.32804	-0.044726		-1.6953	0.027507		-1.73362	0.497286		-1.73579	0.200073
	0.698842	-0.014131		0.700595	0.082919		1.31231	-4.4e-05		1.32935	-0.04519		-1.69462	0.027952		-1.73297	0.496115		-1.73515	0.199786
	0.699529	-0.014242		0.701284	0.083179		1.3136	0.000815		1.33066	-0.045038		-1.69393	0.027537		-1.73233	0.494915		-1.73451	0.199409
	0.700217	-0.014359		0.701974	0.083169		1.3149	0.00148		1.33196	-0.046825		-1.69325	0.027039		-1.73168	0.493715		-1.73387	0.1991
	0.700904	-0.014365		0.702663	0.083282		1.31619	0.001834		1.33327	-0.046969		-1.69257	0.026634		-1.73104	0.490971		-1.73323	0.198772
	0.701591	-0.014522		0.703353	0.082984		1.31748	0.001522		1.33458	-0.047705		-1.69188	0.025965		-1.73039	0.489715		-1.73258	0.198972
	0.702279	-0.014867		0.704042	0.08199		1.31877	0.002284		1.33589	-0.046444		-1.6912	0.025732		-1.72975	0.488597		-1.73194	0.198548
	0.702966	-0.01569		0.704731	0.080395		1.32006	0.003882		1.3372	-0.046192		-1.69051	0.025208		-1.7291	0.488207		-1.7313	0.198265
	0.703653	-0.016756		0.705421	0.079858		1.32135	0.005495		1.3385	-0.045417		-1.68983	0.02501		-1.72845	0.486931		-1.73066	0.197785
	0.70434	-0.016766		0.70611	0.079335		1.32264	0.006402		1.33981	-0.044529		-1.68915	0.025214		-1.72781	0.485311		-1.73001	0.197702
	0.705028	-0.0164		0.7068	0.078607		1.32393	0.00676		1.34112	-0.045016		-1.68846	0.025061		-1.72716	0.485032		-1.72937	0.198168
	0.705715	-0.016294		0.707489	0.079317		1.32522	0.007591		1.34243	-0.046052		-1.68778	0.02481		-1.72652	0.484531		-1.72873	0.198285
	0.706403	-0.01595		0.708178	0.079542		1.32651	0.008193		1.34373	-0.046739		-1.6871	0.024134		-1.72587	0.483725		-1.72809	0.198268
	0.70709	-0.015856		0.708868	0.079059		1.32781	0.00966		1.34504	-0.046956		-1.68641	0.024171		-1.72523	0.482499		-1.72744	0.197687
	0.707777	-0.016149		0.709557	0.078735		1.3291	0.011871		1.34635	-0.047465		-1.68573	0.023681		-1.72458	0.481466		-1.7268	0.19661
	0.708465	-0.016588		0.710247	0.078436		1.33039	0.013172		1.34766	-0.047561		-1.68504	0.02274		-1.72393	0.48084		-1.72616	0.19595
	0.709152	-0.016695		0.710936	0.078147		1.33168	0.012653		1.34897	-0.048102		-1.68436	0.022104		-1.72329	0.479454		-1.72552	0.195912
	0.709839	-0.017721		0.711625	0.077103		1.33297	0.010899		1.35027	-0.048214		-1.68368	0.022294		-1.72264	0.477901		-1.72487	0.196338
	0.710526	-0.017918		0.712315	0.076894		1.33426	0.009587		1.35158	-0.047875		-1.68299	0.022488		-1.722	0.476662		-1.72423	0.196137
	0.711214	-0.01871		0.713004	0.076389		1.33555	0.009228		1.35289	-0.047637		-1.68231	0.022394		-1.72135	0.47606		-1.72359	0.195773
	0.711901	-0.019263		0.713693	0.07606		1.33684	0.009062		1.3542	-0.046466		-1.68162	0.021865		-1.7207	0.474845		-1.72295	0.195676
	0.712589	-0.019386		0.714383	0.076345		1.33813	0.008341		1.35551	-0.04496		-1.68094	0.021136		-1.72006	0.474485		-1.7223	0.196227
	0.713276	-0.020272		0.715072	0.076593		1.33942	0.007728		1.35681	-0.044343		-1.68026	0.02063		-1.71941	0.47251		-1.72166	0.196884
	0.713963	-0.021089		0.715761	0.077243		1.34072	0.008123		1.35812	-0.045072		-1.67957	0.020656		-1.71877	0.47192		-1.72102	0.1969
	0.714651	-0.021956		0.716451	0.077538		1.34201	0.008722		1.35943	-0.045638		-1.67889	0.020234		-1.71812	0.47195		-1.72038	0.195869
	0.715338	-0.022177		0.71714	0.07731		1.3433	0.008674		1.36074	-0.045196		-1.6782	0.020878		-1.71748	0.470669		-1.71973	0.195549
	0.716025	-0.021172		0.71783	0.076927		1.34459	0.007754		1.36204	-0.045009		-1.67752	0.021576		-1.71683	0.471809		-1.71909	0.19619
	0.716712	-0.02091		0.718519	0.077714		1.34588	0.006739		1.36335	-0.045269		-1.67684	0.021432		-1.71619	0.471148		-1.71845	0.196101
	0.7174	-0.020768		0.719208	0.077942		1.34717	0.00559		1.36466	-0.044134		-1.67615	0.020804		-1.71554	0.470598		-1.71781	0.196222
	0.718087	-0.02104		0.719898	0.077449		1.34846	0.004984		1.36597	-0.042847		-1.67547	0.020199		-1.71489	0.470582		-1.71716	0.196366
	0.718775	-0.021924		0.720587	0.076145		1.34975	0.005019		1.36728	-0.042171		-1.67479	0.018864		-1.71425	0.469356		-1.71652	0.195702
	0.719462	-0.021844		0.721277	0.076144		1.35104	0.004558		1.36858	-0.042544		-1.6741	0.018001		-1.7136	0.468666		-1.71588	0.195533
	0.720149	-0.021588		0.721966	0.07664		1.35234	0.003959		1.36989	-0.043203		-1.67342	0.017931		-1.71296	0.467867		-1.71524	0.195547
	0.720837	-0.021888		0.722655	0.076625		1.35363	0.003621		1.3712	-0.043615		-1.67274	0.017685		-1.71231	0.467754		-1.71459	0.195041
	0.721524	-0.021842		0.723345	0.076311		1.35492	0.003442		1.37251	-0.043886		-1.67205	0.016958		-1.71166	0.466078		-1.71395	0.193859
	0.722211	-0.022731		0.724034	0.076293		1.35621	0.003059		1.37382	-0.043273		-1.67137	0.016169		-1.71102	0.465039		-1.71331	0.193225
	0.722898	-0.024329		0.724724	0.076843		1.3575	0.002469		1.37512	-0.043071		-1.67068	0.015292		-1.71037	0.463556		-1.71267	0.192394
	0.723586	-0.024657		0.725413	0.076098		1.35879	0.001573		1.37643	-0.042797		-1.67	0.015565		-1.70973	0.462448		-1.71202	0.192463
	0.724273	-0.024299		0.726102	0.076587		1.36008	0.000689		1.37774	-0.043212		-1.66932	0.015694		-1.70908	0.460599		-1.71138	0.191963
	0.724961	-0.023815		0.726792	0.076495		1.36137	-0.000189		1.37905	-0.043354		-1.66863	0.015335		-1.70844	0.458857		-1.71074	0.191602
	0.725648	-0.023598		0.727481	0.076619		1.36266	-0.001097		1.38036	-0.043453		-1.66795	0.015215		-1.70779	0.457991		-1.7101	0.191413
	0.726335	-0.024521		0.72817	0.076849		1.36395	-0.001617		1.38166	-0.043294		-1.66726	0.016367		-1.70714	0.457879		-1.70945	0.190896
	0.727023	-0.025652		0.72886	0.075545		1.36525	-0.001413		1.38297	-0.043498		-1.66658	0.017072		-1.7065	0.457049		-1.70881	0.190888
	0.72771	-0.02584		0.729549	0.075982		1.36654	-0.0011		1.38428	-0.043815		-1.6659	0.016968		-1.70585	0.456729		-1.70817	0.190746
	0.728397	-0.026033		0.730239	0.076513		1.36783	-0.0021		1.38559	-0.044464		-1.66521	0.017624		-1.70521	0.455473		-1.70753	0.191387
	0.729084	-0.025986		0.730928	0.077439		1.36912	-0.002692		1.38689	-0.044874		-1.66453	0.017769		-1.70456	0.454797		-1.70688	0.191559
	0.729772	-0.025389		0.731617	0.078179		1.37041	-0.001652		1.3882	-0.045188		-1.66385	0.017156		-1.70392	0.453836		-1.70624	0.19139
	0.730459	-0.025378		0.732307	0.078831		1.3717	-0.001302		1.38951	-0.045423		-1.66316	0.016417		-1.70327	0.453954		-1.7056	0.191719
	0.731147	-0.026505		0.732996	0.079738		1.37299	-0.001021		1.39082	-0.044572		-1.66248	0.015911		-1.70262	0.454098		-1.70496	0.192268
	0.731834	-0.02735		0.733685	0.079448		1.37428	-0.001373		1.39213	-0.043548		-1.66179	0.016099		-1.70198	0.453196		-1.70432	0.191994
	0.732521	-0.027132		0.734375	0.078999		1.37557	-0.00099		1.39343	-0.043338		-1.66111	0.016376		-1.70133	0.452567		-1.70367	0.191756
	0.733209	-0.02735		0.735064	0.078446		1.37686	-0.001123		1.39474	-0.044461		-1.66043	0.015872		-1.70069	0.452303		-1.70303	0.191471
	0.733896	-0.027755		0.735754	0.077839		1.37816	-0.000564		1.39605	-0.043602		-1.65974	0.015619		-1.70004	0.451227		-1.70239	0.191118
	0.734583	-0.028217		0.736443	0.076976		1.37945	-0.001141		1.39736	-0.042966		-1.65906	0.015147		-1.69939	0.450825		-1.70175	0.190448
	0.735271	-0.029434		0.737132	0.076823		1.38074	-0.001328		1.39867	-0.04507		-1.65837	0.01417		-1.69875	0.451142		-1.7011	0.190336
	0.735958	-0.029924		0.737822	0.076026		1.38203	-0.000932		1.39997	-0.045151		-1.65769	0.013885		-1.6981	0.450741		-1.70046	0.190557
	0.736645	-0.029904		0.738511	0.075566		1.38332	-7.8e-05		1.40128	-0.045799		-1.65701	0.013263		-1.69746	0.449637		-1.69982	0.190739
	0.737333	-0.029901		0.739201	0.076057		1.38461	-0.001983		1.40259	-0.045015		-1.65632	0.013301		-1.69681	0.448635		-1.69918	0.190943
	0.73802	-0.028701		0.73989	0.076038		1.3859	-0.002808		1.4039	-0.045261		-1.65564	0.012491		-1.69617	0.448192		-1.69853	0.190521
	0.738707	-0.027265		0.740579	0.076715		1.38719	-0.003345		1.40521	-0.045083		-1.65495	0.011175		-1.69552	0.447056		-1.69789	0.190054
	0.739395	-0.026707		0.741269	0.077761		1.38848	-0.004767		1.40651	-0.045189		-1.65427	0.011062		-1.69487	0.445745		-1.69725	0.188631
	0.740082	-0.025939		0.741958	0.077116		1.38977	-0.00531		1.40782	-0.044388		-1.65359	0.010973		-1.69423	0.445027		-1.69661	0.187487
	0.740769	-0.026073		0.742647	0.07587		1.39106	-0.004533		1.40913	-0.044508		-1.6529	0.011009		-1.69358	0.444419		-1.69596	0.186111
	0.741457	-0.026178		0.743337	0.075509		1.39236	-0.003661		1.41044	-0.045157		-1.65222	0.010224		-1.69294	0.443784		-1.69532	0.185933
	0.742144	-0.025412		0.744026	0.075841		1.39365	-0.004287		1.41174	-0.045249		-1.65154	0.009328		-1.69229	0.444089		-1.69468	0.186192
	0.742831	-0.025279		0.744716	0.075928		1.39494	-0.00413		1.41305	-0.045478		-1.65085	0.008552		-1.69165	0.443973		-1.69404	0.186897
	0.743519	-0.025226		0.745405	0.075925		1.39623	-0.002541		1.41436	-0.045747		-1.65017	0.008339		-1.691	0.443966		-1.69339	0.187257
	0.744206	-0.025092		0.746094	0.075774		1.39752	-0.003329		1.41567	-0.045629		-1.64948	0.007494		-1.69035	0.44437		-1.69275	0.187073
	0.744893	-0.024574		0.746784	0.075466		1.39881	-0.003291		1.41698	-0.045138		-1.6488	0.006773		-1.68971	0.443725		-1.69211	0.187524
	0.745581	-0.024925		0.747473	0.075175		1.4001	-0.002019		1.41828	-0.043597		-1.64812	0.006901		-1.68906	0.443787		-1.69147	0.187043
	0.746268	-0.024991		0.748163	0.075152		1.40139	-0.002661		1.41959	-0.043478		-1.64743	0.006547		-1.68842	0.444244		-1.69082	0.187543
	0.746955	-0.025378		0.748852	0.074804		1.40268	-0.004297		1.4209	-0.044295		-1.64675	0.005775		-1.68777	0.444748		-1.69018	0.187156
	0.747643	-0.025393		0.749541	0.074765		1.40397	-0.004585		1.42221	-0.045879		-1.64606	0.006121		-1.68712	0.444321		-1.68954	0.186159
	0.74833	-0.024601		0.750231	0.074055		1.40527	-0.005567		1.42352	-0.047623		-1.64538	0.005841		-1.68648	0.443363		-1.6889	0.185696
	0.749017	-0.023712		0.75092	0.073732		1.40656	-0.00485		1.42482	-0.048701		-1.6447	0.004977		-1.68583	0.442825		-1.68825	0.186297
	0.749705	-0.023423		0.751609	0.07327		1.40785	-0.004635		1.42613	-0.049146		-1.64401	0.004166		-1.68519	0.441591		-1.68761	0.185751
	0.750392	-0.024031		0.752299	0.073167		1.40914	-0.004819		1.42744	-0.049262		-1.64333	0.003494		-1.68454	0.440985		-1.68697	0.184922
	0.751079	-0.024136		0.752988	0.072296		1.41043	-0.004487		1.42875	-0.050149		-1.64265	0.002337		-1.6839	0.440048		-1.68633	0.184579
	0.751767	-0.024168		0.753678	0.072795		1.41172	-0.00324		1.43006	-0.050656		-1.64196	0.002726		-1.68325	0.438713		-1.68569	0.18433
	0.752454	-0.02464		0.754367	0.072249		1.41301	-0.002373		1.43136	-0.04972		-1.64128	0.002834		-1.6826	0.437945		-1.68504	0.183961
	0.753141	-0.024709		0.755056	0.073745		1.4143	-0.002957		1.43267	-0.049963		-1.64059	0.004191		-1.68196	0.436845		-1.6844	0.184494
	0.753829	-0.024431		0.755746	0.073482		1.41559	-0.002199		1.43398	-0.049586		-1.63991	0.005097		-1.68131	0.436285		-1.68376	0.184899
	0.754516	-0.022808		0.756435	0.073311		1.41688	5.6e-05		1.43529	-0.048702		-1.63923	0.005096		-1.68067	0.435624		-1.68311	0.184433
	0.755203	-0.022097		0.757124	0.073071		1.41818	0.001112		1.43659	-0.047721		-1.63854	0.004203		-1.68002	0.433892		-1.68247	0.183596
	0.755891	-0.022044		0.757814	0.073184		1.41947	0.001621		1.4379	-0.047697		-1.63786	0.003955		-1.67938	0.433224		-1.68183	0.183291
	0.756578	-0.021015		0.758503	0.072409		1.42076	0.002255		1.43921	-0.048244		-1.63718	0.004419		-1.67873	0.43339		-1.68119	0.182693
	0.757265	-0.019304		0.759193	0.071526		1.42205	0.001976		1.44052	-0.048699		-1.63649	0.005244		-1.67809	0.43268		-1.68054	0.183068
	0.757953	-0.018237		0.759882	0.072128		1.42334	0.001796		1.44183	-0.048873		-1.63581	0.004797		-1.67744	0.431923		-1.6799	0.183122
	0.75864	-0.018452		0.760571	0.071377		1.42463	0.001766		1.44313	-0.048338		-1.63512	0.003996		-1.67679	0.431372		-1.67926	0.183147
	0.759327	-0.018594		0.761261	0.071007		1.42592	0.001489		1.44444	-0.047757		-1.63444	0.002732		-1.67615	0.429618		-1.67862	0.183417
	0.760015	-0.018067		0.76195	0.070024		1.42721	0.001504		1.44575	-0.04795		-1.63376	0.002205		-1.6755	0.428063		-1.67798	0.183775
	0.760702	-0.017206		0.76264	0.069933		1.4285	0.002599		1.44706	-0.047298		-1.63307	0.001284		-1.67486	0.427037		-1.67733	0.184056
	0.761389	-0.016429		0.763329	0.070076		1.42979	0.003453		1.44836	-0.046491		-1.63239	0.000747		-1.67421	0.42566		-1.67669	0.184445
	0.762077	-0.016486		0.764018	0.069955		1.43109	0.003406		1.44967	-0.046661		-1.6317	-3.3e-05		-1.67356	0.425682		-1.67605	0.184206
	0.762764	-0.016365		0.764708	0.069358		1.43238	0.003688		1.45098	-0.047225		-1.63102	-0.001003		-1.67292	0.424735		-1.67541	0.183409
	0.763451	-0.017309		0.765397	0.067969		1.43367	0.004172		1.45229	-0.047229		-1.63034	-0.001655		-1.67227	0.424611		-1.67476	0.183016
	0.764139	-0.01709		0.766087	0.066699		1.43496	0.004001		1.4536	-0.047734		-1.62965	-0.002005		-1.67163	0.423538		-1.67412	0.182619
	0.764826	-0.015924		0.766776	0.06617		1.43625	0.004516		1.4549	-0.047207		-1.62897	-0.00266		-1.67098	0.422567		-1.67348	0.181737
	0.765513	-0.014278		0.767465	0.065914		1.43754	0.004679		1.45621	-0.045922		-1.62828	-0.002568		-1.67034	0.422244		-1.67284	0.181145
	0.766201	-0.014761		0.768155	0.065585		1.43883	0.004283		1.45752	-0.045433		-1.6276	-0.004274		-1.66969	0.421849		-1.67219	0.180341
	0.766888	-0.013735		0.768844	0.065362		1.44012	0.004593		1.45883	-0.045584		-1.62692	-0.005972		-1.66904	0.420716		-1.67155	0.179532
	0.767575	-0.013414		0.769533	0.065219		1.44141	0.005379		1.46014	-0.045551		-1.62623	-0.006256		-1.6684	0.419777		-1.67091	0.179003
	0.768263	-0.01256		0.770223	0.065346		1.4427	0.005673		1.46144	-0.045362		-1.62555	-0.006313		-1.66775	0.419012		-1.67027	0.179209
	0.76895	-0.011078		0.770912	0.065671		1.444	0.005322		1.46275	-0.045469		-1.62487	-0.00592		-1.66711	0.417699		-1.66962	0.179103
	0.769637	-0.010067		0.771601	0.066471		1.44529	0.005644		1.46406	-0.045288		-1.62418	-0.0051		-1.66646	0.416352		-1.66898	0.178973
	0.770325	-0.009012		0.772291	0.067081		1.44658	0.006205		1.46537	-0.044829		-1.6235	-0.005204		-1.66582	0.415285		-1.66834	0.178211
	0.771012	-0.008118		0.77298	0.066728		1.44787	0.005301		1.46667	-0.045095		-1.62281	-0.005158		-1.66517	0.414807		-1.6677	0.178023
	0.771699	-0.008198		0.77367	0.066829		1.44916	0.00381		1.46798	-0.046423		-1.62213	-0.004814		-1.66452	0.414008		-1.66705	0.177702
	0.772387	-0.008743		0.774359	0.067038		1.45045	0.003015		1.46929	-0.047631		-1.62145	-0.004364		-1.66388	0.412821		-1.66641	0.177013
	0.773074	-0.008841		0.775048	0.066573		1.45174	0.003281		1.4706	-0.048642		-1.62076	-0.004735		-1.66323	0.411286		-1.66577	0.177161
	0.773761	-0.008929		0.775738	0.065994		1.45303	0.003013		1.47191	-0.049397		-1.62008	-0.005364		-1.66259	0.409493		-1.66513	0.177378
	0.774449	-0.008374		0.776427	0.066254		1.45432	0.002832		1.47321	-0.04922		-1.61939	-0.005331		-1.66194	0.407605		-1.66448	0.177596
	0.775136	-0.008972		0.777117	0.065609		1.45562	0.002334		1.47452	-0.049284		-1.61871	-0.005285		-1.66129	0.405741		-1.66384	0.17889
	0.775823	-0.009818		0.777806	0.064694		1.45691	0.002225		1.47583	-0.049395		-1.61803	-0.005631		-1.66065	0.403618		-1.6632	0.178495
	0.776511	-0.009428		0.778495	0.064495		1.4582	0.002687		1.47714	-0.049351		-1.61734	-0.005475		-1.66	0.401056		-1.66256	0.178058
	0.777198	-0.009938		0.779185	0.064646		1.45949	0.00203		1.47845	-0.049863		-1.61666	-0.004949		-1.65936	0.399227		-1.66192	0.178309
	0.777885	-0.009321		0.779874	0.063742		1.46078	0.000543		1.47975	-0.05051		-1.61598	-0.004729		-1.65871	0.39759		-1.66127	0.177659
	0.778573	-0.010196		0.780564	0.063067		1.46207	-0.00022		1.48106	-0.051044		-1.61529	-0.00471		-1.65807	0.395429		-1.66063	0.178137
	0.77926	-0.009584		0.781253	0.062362		1.46336	-0.000485		1.48237	-0.05112		-1.61461	-0.005385		-1.65742	0.393733		-1.65999	0.176891
	0.779947	-0.009569		0.781942	0.062053		1.46465	-0.000536		1.48368	-0.051101		-1.61393	-0.006311		-1.65678	0.391472		-1.65935	0.177018
	0.780635	-0.008815		0.782632	0.06165		1.46594	-0.000377		1.48498	-0.051408		-1.61324	-0.006282		-1.65613	0.388617		-1.6587	0.176027
	0.781322	-0.00912		0.783321	0.061446		1.46724	0.000169		1.48629	-0.050839		-1.61256	-0.006172		-1.65548	0.386269		-1.65806	0.175983
	0.782009	-0.008496		0.78401	0.060862		1.46853	-0.000288		1.4876	-0.04988		-1.61187	-0.006942		-1.65484	0.384632		-1.65742	0.176008
	0.782697	-0.008411		0.7847	0.06143		1.46982	-0.000242		1.48891	-0.049964		-1.61119	-0.00731		-1.65419	0.383411		-1.65678	0.174779
	0.783384	-0.008513		0.785389	0.060926		1.47111	0.000572		1.49022	-0.05003		-1.61051	-0.007101		-1.65355	0.381926		-1.65613	0.173973
	0.784071	-0.008911		0.786079	0.060634		1.4724	0.001015		1.49152	-0.050045		-1.60982	-0.007297		-1.6529	0.380074		-1.65549	0.17419
	0.784759	-0.008998		0.786768	0.060593		1.47369	0.001126		1.49283	-0.05029		-1.60914	-0.007555		-1.65225	0.378298		-1.65485	0.173183
	0.785446	-0.009265		0.787457	0.059719		1.47498	0.000867		1.49414	-0.051197		-1.60845	-0.007431		-1.65161	0.376543		-1.65421	0.172994
	0.786133	-0.009262		0.788147	0.060426		1.47627	0.00069		1.49545	-0.051124		-1.60777	-0.007934		-1.65096	0.37555		-1.65356	0.172738
	0.786821	-0.009974		0.788836	0.059373		1.47756	-0.00012		1.49676	-0.051371		-1.60709	-0.008376		-1.65032	0.374529		-1.65292	0.172198
	0.787508	-0.010059		0.789526	0.058925		1.47885	-0.000863		1.49806	-0.052325		-1.6064	-0.009076		-1.64967	0.373435		-1.65228	0.171679
	0.788195	-0.011182		0.790215	0.058418		1.48015	-0.000177		1.49937	-0.052932		-1.60572	-0.00967		-1.64903	0.371797		-1.65164	0.171094
	0.788883	-0.011543		0.790904	0.058331		1.48144	0.000741		1.50068	-0.052839		-1.60503	-0.009775		-1.64838	0.369837		-1.65099	0.170409
	0.78957	-0.011604		0.791594	0.058248		1.48273	0.000715		1.50199	-0.053104		-1.60435	-0.009458		-1.64773	0.368468		-1.65035	0.170119
	0.790257	-0.011734		0.792283	0.05787		1.48402	0.000982		1.5033	-0.052537		-1.60367	-0.009291		-1.64709	0.366485		-1.64971	0.170056
	0.790945	-0.012378		0.792972	0.057736		1.48531	0.001073		1.5046	-0.052143		-1.60298	-0.010276		-1.64644	0.364063		-1.64907	0.16976
	0.791632	-0.012565		0.793662	0.05698		1.4866	0.001669		1.50591	-0.052843		-1.6023	-0.010983		-1.6458	0.362336		-1.64842	0.16912
	0.792319	-0.012811		0.794351	0.057282		1.48789	0.002104		1.50722	-0.053348		-1.60162	-0.011724		-1.64515	0.361009		-1.64778	0.168553
	0.793007	-0.012695		0.795041	0.057561		1.48918	0.001918		1.50853	-0.054442		-1.60093	-0.012133		-1.64451	0.359928		-1.64714	0.168622
	0.793694	-0.013459		0.79573	0.057685		1.49047	0.00163		1.50984	-0.055161		-1.60025	-0.011163		-1.64386	0.359534		-1.6465	0.168203
	0.794381	-0.014429		0.796419	0.057809		1.49176	0.002426		1.51114	-0.054962		-1.59956	-0.010262		-1.64321	0.359117		-1.64585	0.167883
	0.795069	-0.0149		0.797109	0.057218		1.49305	0.003685		1.51245	-0.055577		-1.59888	-0.010789		-1.64257	0.358275		-1.64521	0.167262
	0.795756	-0.014369		0.797798	0.057252		1.49435	0.004676		1.51376	-0.056827		-1.5982	-0.011319		-1.64192	0.358016		-1.64457	0.166038
	0.796443	-0.014624		0.798487	0.057627		1.49564	0.004727		1.51507	-0.057475		-1.59751	-0.011275		-1.64128	0.357391		-1.64393	0.165086
	0.797131	-0.014447		0.799177	0.057578		1.49693	0.00536		1.51637	-0.058424		-1.59683	-0.011259		-1.64063	0.356515		-1.64328	0.164573
	0.797818	-0.014119		0.799866	0.058147		1.49822	0.006535		1.51768	-0.059517		-1.59614	-0.011223		-1.63999	0.356048		-1.64264	0.164232
	0.798505	-0.015289		0.800556	0.058532		1.49951	0.006771		1.51899	-0.05985		-1.59546	-0.010651		-1.63934	0.355563		-1.642	0.16435
	0.799193	-0.016292		0.801245	0.058053		1.5008	0.007065		1.5203	-0.060266		-1.59478	-0.010032		-1.63869	0.354763		-1.64136	0.164727
	0.79988	-0.017617		0.801934	0.057426		1.50209	0.008379		1.52161	-0.060497		-1.59409	-0.010355		-1.63805	0.353633		-1.64071	0.165011
	0.800567	-0.017437		0.802624	0.057149		1.50338	0.007988		1.52291	-0.060783		-1.59341	-0.010255		-1.6374	0.352893		-1.64007	0.164876
	0.801255	-0.018429		0.803313	0.05777		1.50467	0.007992		1.52422	-0.060937		-1.59273	-0.0101		-1.63676	0.352188		-1.63943	0.164346
	0.801942	-0.019454		0.804003	0.057502		1.50596	0.00803		1.52553	-0.060582		-1.59204	-0.010433		-1.63611	0.351402		-1.63879	0.163683
	0.802629	-0.02052		0.804692	0.057297		1.50726	0.007662		1.52684	-0.06084		-1.59136	-0.01103		-1.63546	0.350816		-1.63814	0.163378
	0.803317	-0.021378		0.805381	0.056838		1.50855	0.00693		1.52815	-0.061138		-1.59067	-0.011892		-1.63482	0.350047		-1.6375	0.163207
	0.804004	-0.022012		0.806071	0.055381		1.50984	0.006239		1.52945	-0.061103		-1.58999	-0.012196		-1.63417	0.349237		-1.63686	0.162771
	0.804691	-0.023114		0.80676	0.054661		1.51113	0.006571		1.53076	-0.061021		-1.58931	-0.012364		-1.63353	0.348225		-1.63622	0.162995
	0.805379	-0.024431		0.807449	0.055015		1.51242	0.006017		1.53207	-0.061072		-1.58862	-0.012895		-1.63288	0.346831		-1.63558	0.163143
	0.806066	-0.025807		0.808139	0.054454		1.51371	0.00534		1.53338	-0.061105		-1.58794	-0.013537		-1.63224	0.345283		-1.63493	0.162999
	0.806753	-0.026736		0.808828	0.05411		1.515	0.003973		1.53469	-0.061779		-1.58726	-0.013769		-1.63159	0.344508		-1.63429	0.163737
	0.807441	-0.027715		0.809518	0.053612		1.51629	0.004217		1.53599	-0.063565		-1.58657	-0.013455		-1.63094	0.344466		-1.63365	0.1643
	0.808128	-0.028435		0.810207	0.054197		1.51758	0.005023		1.5373	-0.064433		-1.58589	-0.013346		-1.6303	0.34458		-1.63301	0.164134
	0.808815	-0.029084		0.810896	0.054741		1.51887	0.004933		1.53861	-0.064371		-1.5852	-0.014018		-1.62965	0.344407		-1.63236	0.163758
	0.809503	-0.028729		0.811586	0.054863		1.52016	0.0033		1.53992	-0.06423		-1.58452	-0.014534		-1.62901	0.344381		-1.63172	0.16301
	0.81019	-0.028998		0.812275	0.054274		1.52146	0.002577		1.54122	-0.063832		-1.58384	-0.014744		-1.62836	0.344907		-1.63108	0.163006
	0.810877	-0.029712		0.812964	0.053311		1.52275	0.003017		1.54253	-0.063831		-1.58315	-0.015444		-1.62772	0.344823		-1.63044	0.163007
	0.811565	-0.030136		0.813654	0.05283		1.52404	0.001884		1.54384	-0.064061		-1.58247	-0.016203		-1.62707	0.344459		-1.62979	0.161867
	0.812252	-0.030715		0.814343	0.052918		1.52533	0.000694		1.54515	-0.063825		-1.58178	-0.016138		-1.62642	0.34426		-1.62915	0.161197
	0.812939	-0.030951		0.815033	0.053019		1.52662	0.000736		1.54645	-0.062112		-1.5811	-0.016299		-1.62578	0.344068		-1.62851	0.160475
	0.813627	-0.031008		0.815722	0.053662		1.52791	0.001		1.54776	-0.061125		-1.58042	-0.016648		-1.62513	0.343103		-1.62787	0.160093
	0.814314	-0.030421		0.816411	0.053246		1.5292	-0.000198		1.54907	-0.060381		-1.57973	-0.016721		-1.62449	0.34214		-1.62722	0.160041
	0.815001	-0.03019		0.817101	0.052638		1.53049	-0.001583		1.55038	-0.060143		-1.57905	-0.017684		-1.62384	0.341723		-1.62658	0.159865
	0.815689	-0.029712		0.81779	0.052456		1.53178	-0.001848		1.55169	-0.06081		-1.57837	-0.018527		-1.62319	0.340996		-1.62594	0.15982
	0.816376	-0.029985		0.81848	0.05221		1.53307	-0.002993		1.55299	-0.062315		-1.57768	-0.018448		-1.62255	0.340367		-1.6253	0.159536
	0.817063	-0.030445		0.819169	0.05167		1.53437	-0.005267		1.5543	-0.063199		-1.577	-0.018237		-1.6219	0.33968		-1.62465	0.159559
	0.817751	-0.030283		0.819858	0.051481		1.53566	-0.006056		1.55561	-0.064209		-1.57631	-0.017702		-1.62126	0.33897		-1.62401	0.159791
	0.818438	-0.03046		0.820548	0.051381		1.53695	-0.006401		1.55692	-0.064674		-1.57563	-0.017457		-1.62061	0.338986		-1.62337	0.159456
	0.819125	-0.030492		0.821237	0.051292		1.53824	-0.006668		1.55823	-0.064461		-1.57495	-0.017573		-1.61997	0.338579		-1.62273	0.159812
	0.819813	-0.030036		0.821927	0.050507		1.53953	-0.006406		1.55953	-0.064482		-1.57426	-0.017366		-1.61932	0.338703		-1.62208	0.159605
	0.8205	-0.030159		0.822616	0.04993		1.54082	-0.006083		1.56084	-0.064896		-1.57358	-0.017255		-1.61868	0.338411		-1.62144	0.158971
	0.821187	-0.030578		0.823305	0.049972		1.54211	-0.005585		1.56215	-0.065524		-1.57289	-0.01788		-1.61803	0.337201		-1.6208	0.158092
	0.821875	-0.030887		0.823995	0.04995		1.5434	-0.00535		1.56346	-0.065868		-1.57221	-0.018429		-1.61738	0.336253		-1.62016	0.157379
	0.822562	-0.031903		0.824684	0.049708		1.54469	-0.005077		1.56477	-0.065943		-1.57153	-0.018699		-1.61674	0.334752		-1.61951	0.157216
	0.823249	-0.033186		0.825373	0.0493		1.54598	-0.004495		1.56607	-0.065003		-1.57084	-0.019282		-1.61609	0.334357		-1.61887	0.157182
	0.823937	-0.033583		0.826063	0.049699		1.54728	-0.004518		1.56738	-0.064439		-1.57016	-0.020114		-1.61545	0.334214		-1.61823	0.156957
	0.824624	-0.033435		0.826752	0.050094		1.54857	-0.00562		1.56869	-0.063601		-1.56947	-0.02068		-1.6148	0.335047		-1.61759	0.156465
	0.825311	-0.033275		0.827441	0.049881		1.54986	-0.006515		1.57	-0.062733		-1.56879	-0.02128		-1.61416	0.335325		-1.61694	0.156428
	0.825999	-0.033519		0.828131	0.048871		1.55115	-0.006354		1.5713	-0.062852		-1.56811	-0.020971		-1.61351	0.335036		-1.6163	0.156434
	0.826686	-0.033241		0.82882	0.047765		1.55244	-0.004912		1.57261	-0.063192		-1.56742	-0.020612		-1.61286	0.335005		-1.61566	0.155606
	0.827374	-0.032643		0.82951	0.04793		1.55373	-0.004565		1.57392	-0.06352		-1.56674	-0.020662		-1.61222	0.334331		-1.61502	0.154595
	0.828061	-0.032834		0.830199	0.048258		1.55502	-0.005032		1.57523	-0.064166		-1.56606	-0.021705		-1.61157	0.333033		-1.61437	0.15452
	0.828748	-0.032921		0.830889	0.049292		1.55631	-0.00396		1.57654	-0.063645		-1.56537	-0.022371		-1.61093	0.332384		-1.61373	0.154407
	0.829435	-0.033103		0.831578	0.049236		1.5576	-0.003581		1.57784	-0.064396		-1.56469	-0.022709		-1.61028	0.332131		-1.61309	0.15413
	0.830123	-0.033469		0.832267	0.048234		1.5589	-0.004938		1.57915	-0.065873		-1.564	-0.02287		-1.60963	0.331301		-1.61245	0.154697
	0.83081	-0.033814		0.832957	0.047572		1.56019	-0.006492		1.58046	-0.066749		-1.56332	-0.022834		-1.60899	0.329581		-1.6118	0.155543
	0.831497	-0.034211		0.833646	0.046223		1.56148	-0.005664		1.58177	-0.066797		-1.56264	-0.023492		-1.60834	0.328819		-1.61116	0.156145
	0.832185	-0.033457		0.834335	0.04486		1.56277	-0.004534		1.58308	-0.0663		-1.56195	-0.023948		-1.6077	0.32783		-1.61052	0.155527
	0.832872	-0.033235		0.835025	0.044344		1.56406	-0.004815		1.58438	-0.064758		-1.56127	-0.02463		-1.60705	0.32577		-1.60988	0.154221
	0.83356	-0.032825		0.835714	0.044712		1.56535	-0.004508		1.58569	-0.063005		-1.56059	-0.024546		-1.60641	0.325017		-1.60923	0.153597
	0.834247	-0.032394		0.836404	0.045062		1.56664	-0.004042		1.587	-0.062563		-1.5599	-0.023792		-1.60576	0.324506		-1.60859	0.152927
	0.834934	-0.03219		0.837093	0.044105		1.56793	-0.004163		1.58831	-0.061923		-1.55922	-0.023807		-1.60511	0.323602		-1.60795	0.152765
	0.835621	-0.032085		0.837782	0.043504		1.56922	-0.004667		1.58962	-0.061198		-1.55853	-0.024298		-1.60447	0.321687		-1.60731	0.152813
	0.836309	-0.031608		0.838472	0.042557		1.57052	-0.004275		1.59092	-0.061537		-1.55785	-0.024307		-1.60382	0.320886		-1.60667	0.152395
	0.836996	-0.031564		0.839161	0.04262		1.57181	-0.003696		1.59223	-0.061431		-1.55717	-0.023558		-1.60318	0.320128		-1.60602	0.152142
	0.837683	-0.031499		0.83985	0.042623		1.5731	-0.003085		1.59354	-0.060985		-1.55648	-0.023401		-1.60253	0.319866		-1.60538	0.152439
	0.838371	-0.030984		0.84054	0.042818		1.57439	-0.003209		1.59485	-0.060343		-1.5558	-0.023739		-1.60189	0.319599		-1.60474	0.152474
	0.839058	-0.030954		0.841229	0.04233		1.57568	-0.004185		1.59615	-0.059826		-1.55511	-0.023973		-1.60124	0.319041		-1.6041	0.151662
	0.839746	-0.030474		0.841919	0.041925		1.57697	-0.004642		1.59746	-0.059066		-1.55443	-0.024156		-1.60059	0.318805		-1.60345	0.15081
	0.840433	-0.029152		0.842608	0.041628		1.57826	-0.004694		1.59877	-0.058442		-1.55375	-0.024591		-1.59995	0.318395		-1.60281	0.149429
	0.84112	-0.028739		0.843297	0.041564		1.57955	-0.004792		1.60008	-0.058174		-1.55306	-0.025313		-1.5993	0.31902		-1.60217	0.147486
	0.841807	-0.028375		0.843987	0.041186		1.58084	-0.004515		1.60139	-0.057267		-1.55238	-0.026193		-1.59866	0.318216		-1.60153	0.146533
	0.842495	-0.028258		0.844676	0.039827		1.58213	-0.004109		1.60269	-0.057732		-1.5517	-0.026773		-1.59801	0.317518		-1.60088	0.146431
	0.843182	-0.027931		0.845366	0.038709		1.58343	-0.004088		1.604	-0.057512		-1.55101	-0.027571		-1.59736	0.317055		-1.60024	0.146217
	0.843869	-0.028264		0.846055	0.03859		1.58472	-0.003498		1.60531	-0.05745		-1.55033	-0.02743		-1.59672	0.316874		-1.5996	0.145822
	0.844557	-0.027697		0.846744	0.039459		1.58601	-0.00301		1.60662	-0.057367		-1.54964	-0.027722		-1.59607	0.314785		-1.59896	0.145183
	0.845244	-0.027306		0.847434	0.039942		1.5873	-0.003676		1.60793	-0.05732		-1.54896	-0.027866		-1.59543	0.31422		-1.59831	0.144603
	0.845932	-0.026135		0.848123	0.040218		1.58859	-0.004644		1.60923	-0.057564		-1.54828	-0.027728		-1.59478	0.313439		-1.59767	0.145213
	0.846619	-0.025767		0.848812	0.040559		1.58988	-0.003732		1.61054	-0.05695		-1.54759	-0.027557		-1.59414	0.313048		-1.59703	0.145394
	0.847306	-0.025005		0.849502	0.040587		1.59117	-0.002238		1.61185	-0.056416		-1.54691	-0.028144		-1.59349	0.31192		-1.59639	0.145506
	0.847993	-0.023603		0.850191	0.040468		1.59246	-0.002574		1.61316	-0.05681		-1.54622	-0.027879		-1.59284	0.310809		-1.59574	0.145708
	0.848681	-0.024553		0.850881	0.041271		1.59375	-0.004288		1.61447	-0.057663		-1.54554	-0.027284		-1.5922	0.311622		-1.5951	0.145528
	0.849368	-0.025255		0.85157	0.041988		1.59504	-0.00528		1.61577	-0.058355		-1.54486	-0.026881		-1.59155	0.311837		-1.59446	0.145697
	0.850055	-0.024937		0.852259	0.041661		1.59633	-0.005161		1.61708	-0.059584		-1.54417	-0.026644		-1.59091	0.312058		-1.59382	0.145545
	0.850743	-0.025866		0.852949	0.041622		1.59763	-0.005588		1.61839	-0.060085		-1.54349	-0.02723		-1.59026	0.312644		-1.59317	0.145373
	0.85143	-0.026034		0.853638	0.041107		1.59892	-0.005246		1.6197	-0.059676		-1.5428	-0.027472		-1.58962	0.311276		-1.59253	0.145609
	0.852118	-0.026351		0.854327	0.041536		1.60021	-0.005753		1.621	-0.059123		-1.54212	-0.02842		-1.58897	0.311164		-1.59189	0.145661
	0.852805	-0.025657		0.855017	0.041012		1.6015	-0.005974		1.62231	-0.058569		-1.54144	-0.029752		-1.58832	0.310827		-1.59125	0.145342
	0.853492	-0.025164		0.855706	0.040473		1.60279	-0.007141		1.62362	-0.058475		-1.54075	-0.030158		-1.58768	0.309493		-1.59061	0.1452
	0.854179	-0.02537		0.856396	0.040749		1.60408	-0.008155		1.62493	-0.059118		-1.54007	-0.030543		-1.58703	0.308629		-1.58996	0.144811
	0.854867	-0.024923		0.857085	0.041382		1.60537	-0.008519		1.62624	-0.058993		-1.53939	-0.031643		-1.58639	0.306787		-1.58932	0.145458
	0.855554	-0.023946		0.857774	0.041182		1.60666	-0.007404		1.62754	-0.058747		-1.5387	-0.032106		-1.58574	0.306068		-1.58868	0.146151
	0.856241	-0.023533		0.858464	0.041089		1.60795	-0.006903		1.62885	-0.059119		-1.53802	-0.03246		-1.58509	0.306206		-1.58804	0.146765
	0.856929	-0.022569		0.859153	0.04077		1.60925	-0.00689		1.63016	-0.060104		-1.53733	-0.032491		-1.58445	0.306778		-1.58739	0.14641
	0.857616	-0.021643		0.859843	0.041251		1.61054	-0.007187		1.63147	-0.060808		-1.53665	-0.032273		-1.5838	0.306523		-1.58675	0.145912
	0.858304	-0.021454		0.860532	0.041018		1.61183	-0.006495		1.63278	-0.061078		-1.53597	-0.032019		-1.58316	0.306473		-1.58611	0.146297
	0.858991	-0.021904		0.861221	0.040085		1.61312	-0.006964		1.63408	-0.060652		-1.53528	-0.031733		-1.58251	0.305695		-1.58546	0.146598
	0.859678	-0.022471		0.861911	0.039566		1.61441	-0.006186		1.63539	-0.061962		-1.5346	-0.030941		-1.58187	0.306296		-1.58482	0.147062
	0.860365	-0.022326		0.8626	0.04027		1.6157	-0.006431		1.6367	-0.063178		-1.53391	-0.030996		-1.58122	0.306059		-1.58418	0.146752
	0.861053	-0.022473		0.863289	0.041137		1.61699	-0.007871		1.63801	-0.063559		-1.53323	-0.032063		-1.58058	0.305141		-1.58354	0.14623
	0.86174	-0.022793		0.863979	0.041007		1.61828	-0.007348		1.63932	-0.063791		-1.53255	-0.032477		-1.57993	0.304489		-1.5829	0.146074
	0.862427	-0.022655		0.864668	0.040366		1.61957	-0.007155		1.64062	-0.063026		-1.53186	-0.033097		-1.57928	0.30392		-1.58225	0.146136
	0.863115	-0.022139		0.865358	0.03887		1.62086	-0.006584		1.64193	-0.062548		-1.53118	-0.033492		-1.57864	0.302948		-1.58161	0.145162
	0.863802	-0.022221		0.866047	0.037737		1.62216	-0.007013		1.64324	-0.062307		-1.5305	-0.033933		-1.57799	0.302076		-1.58097	0.14492
	0.86449	-0.02183		0.866736	0.037612		1.62345	-0.007299		1.64455	-0.061494		-1.52981	-0.034367		-1.57735	0.30128		-1.58033	0.144756
	0.865177	-0.021256		0.867426	0.038167		1.62474	-0.006322		1.64585	-0.060858		-1.52913	-0.034728		-1.5767	0.301105		-1.57968	0.143688
	0.865864	-0.021023		0.868115	0.03875		1.62603	-0.005353		1.64716	-0.060053		-1.52845	-0.034981		-1.57605	0.300192		-1.57904	0.143683
	0.866551	-0.021386		0.868804	0.039086		1.62732	-0.004244		1.64847	-0.059029		-1.52776	-0.034974		-1.57541	0.300103		-1.5784	0.143263
	0.867239	-0.02093		0.869494	0.038958		1.62861	-0.003217		1.64978	-0.058547		-1.52708	-0.035248		-1.57476	0.300272		-1.57776	0.143668
	0.867926	-0.020609		0.870183	0.038514		1.6299	-0.003538		1.65108	-0.058535		-1.52639	-0.035895		-1.57412	0.299487		-1.57711	0.144034
	0.868613	-0.0203		0.870873	0.03799		1.63119	-0.002939		1.65239	-0.058788		-1.52571	-0.036862		-1.57347	0.299154		-1.57647	0.14392
	0.869301	-0.020179		0.871562	0.037625		1.63248	-0.002307		1.6537	-0.059464		-1.52503	-0.037406		-1.57283	0.298102		-1.57583	0.143876
	0.869988	-0.019808		0.872252	0.037854		1.63377	-0.00118		1.65501	-0.059751		-1.52434	-0.037224		-1.57218	0.298627		-1.57519	0.144161
	0.870676	-0.019197		0.872941	0.038814		1.63506	-0.000681		1.65632	-0.05915		-1.52366	-0.037141		-1.57153	0.297908		-1.57454	0.144424
	0.871363	-0.019171		0.87363	0.038824		1.63636	-0.000561		1.65762	-0.05881		-1.52297	-0.037259		-1.57089	0.296987		-1.5739	0.144063
	0.87205	-0.019807		0.87432	0.039822		1.63765	-0.000814		1.65893	-0.059651		-1.52229	-0.037812		-1.57024	0.296531		-1.57326	0.143219
	0.872737	-0.02008		0.875009	0.039769		1.63894	-0.002361		1.66024	-0.06002		-1.52161	-0.038443		-1.5696	0.296634		-1.57262	0.142692
	0.873425	-0.020217		0.875698	0.039849		1.64023	-0.002781		1.66155	-0.060091		-1.52092	-0.038671		-1.56895	0.296368		-1.57197	0.142862
	0.874112	-0.020293		0.876388	0.039872		1.64152	-0.003779		1.66286	-0.059376		-1.52024	-0.038966		-1.56831	0.296346		-1.57133	0.143445
	0.874799	-0.02021		0.877077	0.039524		1.64281	-0.004121		1.66416	-0.05892		-1.51955	-0.038663		-1.56766	0.296593		-1.57069	0.143849
	0.875487	-0.020288		0.877767	0.03927		1.6441	-0.00372		1.66547	-0.059087		-1.51887	-0.03836		-1.56701	0.295839		-1.57005	0.144704
	0.876174	-0.020733		0.878456	0.039155		1.64539	-0.004706		1.66678	-0.058861		-1.51819	-0.038405		-1.56637	0.295085		-1.5694	0.145203
	0.876862	-0.02093		0.879145	0.040681		1.64668	-0.006786		1.66809	-0.057039		-1.5175	-0.03805		-1.56572	0.295763		-1.56876	0.144721
	0.877549	-0.020451		0.879835	0.041204		1.64797	-0.007058		1.66939	-0.056276		-1.51682	-0.037678		-1.56508	0.295516		-1.56812	0.144582
	0.878236	-0.021125		0.880524	0.040313		1.64927	-0.007429		1.6707	-0.055288		-1.51614	-0.036828		-1.56443	0.295789		-1.56748	0.144759
	0.878923	-0.021498		0.881213	0.039474		1.65056	-0.007981		1.67201	-0.054795		-1.51545	-0.036704		-1.56378	0.296323		-1.56683	0.144762
	0.879611	-0.02255		0.881903	0.038691		1.65185	-0.008341		1.67332	-0.055661		-1.51477	-0.037059		-1.56314	0.296039		-1.56619	0.144224
	0.880298	-0.023476		0.882592	0.038091		1.65314	-0.008721		1.67463	-0.055963		-1.51408	-0.037613		-1.56249	0.295653		-1.56555	0.143804
	0.880985	-0.023634		0.883281	0.037656		1.65443	-0.008336		1.67593	-0.056729		-1.5134	-0.038428		-1.56185	0.295024		-1.56491	0.143805
	0.881673	-0.024872		0.883971	0.037273		1.65572	-0.007825		1.67724	-0.05866		-1.51272	-0.038527		-1.5612	0.295088		-1.56427	0.143148
	0.88236	-0.024631		0.88466	0.036619		1.65701	-0.008695		1.67855	-0.05924		-1.51203	-0.039434		-1.56056	0.295141		-1.56362	0.143043
	0.883048	-0.024195		0.88535	0.036458		1.6583	-0.009251		1.67986	-0.059735		-1.51135	-0.039537		-1.55991	0.294101		-1.56298	0.143
	0.883735	-0.024689		0.886039	0.03644		1.65959	-0.010332		1.68117	-0.060293		-1.51066	-0.039573		-1.55926	0.292947		-1.56234	0.142199
	0.884422	-0.025231		0.886729	0.035398		1.66088	-0.011943		1.68247	-0.061075		-1.50998	-0.039605		-1.55862	0.292406		-1.5617	0.141689
	0.885109	-0.025495		0.887418	0.034735		1.66218	-0.012355		1.68378	-0.061766		-1.5093	-0.040232		-1.55797	0.291476		-1.56105	0.141841
	0.885797	-0.025396		0.888107	0.034192		1.66347	-0.013472		1.68509	-0.061216		-1.50861	-0.039987		-1.55733	0.290782		-1.56041	0.141802
	0.886484	-0.025569		0.888797	0.033992		1.66476	-0.013297		1.6864	-0.059414		-1.50793	-0.040285		-1.55668	0.289481		-1.55977	0.141568
	0.887172	-0.025974		0.889486	0.033615		1.66605	-0.014225		1.68771	-0.060067		-1.50724	-0.040318		-1.55604	0.288333		-1.55913	0.140909
	0.887859	-0.026395		0.890175	0.033321		1.66734	-0.013365		1.68901	-0.061284		-1.50656	-0.040622		-1.55539	0.287612		-1.55848	0.140332
	0.888546	-0.026694		0.890865	0.032804		1.66863	-0.012637		1.69032	-0.06107		-1.50588	-0.040156		-1.55475	0.287211		-1.55784	0.139717
	0.889234	-0.026945		0.891554	0.031784		1.66992	-0.013128		1.69163	-0.060528		-1.50519	-0.040265		-1.5541	0.286963		-1.5572	0.138636
	0.889921	-0.027255		0.892244	0.031085		1.67121	-0.012736		1.69294	-0.060792		-1.50451	-0.039961		-1.55345	0.286916		-1.55656	0.137773
	0.890608	-0.027342		0.892933	0.030303		1.6725	-0.011799		1.69425	-0.060639		-1.50383	-0.039717		-1.55281	0.286431		-1.55591	0.137118
	0.891295	-0.027789		0.893622	0.029957		1.67379	-0.010708		1.69555	-0.061189		-1.50314	-0.040271		-1.55216	0.285788		-1.55527	0.136713
	0.891983	-0.0282		0.894312	0.029715		1.67509	-0.010774		1.69686	-0.062013		-1.50246	-0.040193		-1.55152	0.285396		-1.55463	0.1363
	0.89267	-0.028215		0.895001	0.030201		1.67638	-0.010813		1.69817	-0.06191		-1.50178	-0.040453		-1.55087	0.28475		-1.55399	0.135408
	0.893358	-0.027877		0.89569	0.030973		1.67767	-0.009223		1.69948	-0.062381		-1.50109	-0.040652		-1.55022	0.283943		-1.55334	0.134929
	0.894045	-0.027979		0.89638	0.030276		1.67896	-0.008016		1.70078	-0.063363		-1.50041	-0.04096		-1.54958	0.282749		-1.5527	0.134621
	0.894732	-0.028657		0.897069	0.029815		1.68025	-0.00776		1.70209	-0.063475		-1.49972	-0.041227		-1.54893	0.281765		-1.55206	0.134932
	0.89542	-0.029289		0.897759	0.029294		1.68154	-0.007536		1.7034	-0.063545		-1.49904	-0.040922		-1.54829	0.281588		-1.55142	0.135174
	0.896107	-0.029611		0.898448	0.029027		1.68283	-0.008097		1.70471	-0.064421		-1.49836	-0.040698		-1.54764	0.281124		-1.55077	0.135376
	0.896794	-0.030143		0.899137	0.028943		1.68412	-0.007945		1.70602	-0.065217		-1.49767	-0.040168		-1.547	0.280955		-1.55013	0.135017
	0.897481	-0.030684		0.899827	0.029582		1.68541	-0.007331		1.70732	-0.065751		-1.49699	-0.039917		-1.54635	0.280855		-1.54949	0.134478
	0.898169	-0.031322		0.900516	0.029889		1.68671	-0.00772		1.70863	-0.066145		-1.4963	-0.039459		-1.5457	0.28034		-1.54885	0.134476
	0.898856	-0.031694		0.901206	0.029126		1.688	-0.008243		1.70994	-0.06545		-1.49562	-0.039753		-1.54506	0.280519		-1.5482	0.134841
	0.899544	-0.031723		0.901895	0.028557		1.68929	-0.008659		1.71125	-0.06507		-1.49494	-0.039709		-1.54441	0.280325		-1.54756	0.134556
	0.900231	-0.031866		0.902584	0.028441		1.69058	-0.008737		1.71256	-0.065644		-1.49425	-0.038798		-1.54377	0.280613		-1.54692	0.134059
	0.900918	-0.032198		0.903274	0.027914		1.69187	-0.008676		1.71386	-0.065905		-1.49357	-0.039058		-1.54312	0.280113		-1.54628	0.133532
	0.901606	-0.033122		0.903963	0.027875		1.69316	-0.008336		1.71517	-0.06529		-1.49289	-0.039234		-1.54248	0.279442		-1.54563	0.132931
	0.902293	-0.034474		0.904652	0.028097		1.69445	-0.007426		1.71648	-0.065126		-1.4922	-0.039873		-1.54183	0.278761		-1.54499	0.13283
	0.90298	-0.035288		0.905342	0.028254		1.69574	-0.007018		1.71779	-0.06552		-1.49152	-0.040396		-1.54118	0.278797		-1.54435	0.132186
	0.903667	-0.036197		0.906031	0.028207		1.69703	-0.005889		1.7191	-0.066577		-1.49083	-0.040454		-1.54054	0.279393		-1.54371	0.132388
	0.904355	-0.036763		0.906721	0.027856		1.69832	-0.006117		1.7204	-0.067072		-1.49015	-0.041064		-1.53989	0.279341		-1.54306	0.131564
	0.905042	-0.037775		0.90741	0.027294		1.69962	-0.007234		1.72171	-0.06649		-1.48947	-0.04198		-1.53925	0.279214		-1.54242	0.1317
	0.90573	-0.037771		0.908099	0.026714		1.70091	-0.007186		1.72302	-0.066697		-1.48878	-0.042802		-1.5386	0.279014		-1.54178	0.131786
	0.906417	-0.037814		0.908789	0.026704		1.7022	-0.006089		1.72433	-0.066597		-1.4881	-0.042945		-1.53795	0.278513		-1.54114	0.131419
	0.907104	-0.037988		0.909478	0.027061		1.70349	-0.005699		1.72563	-0.066538		-1.48741	-0.043061		-1.53731	0.27714		-1.54049	0.131299
	0.907792	-0.03804		0.910167	0.026738		1.70478	-0.005892		1.72694	-0.067044		-1.48673	-0.042583		-1.53666	0.276099		-1.53985	0.13067
	0.908479	-0.038831		0.910857	0.026837		1.70607	-0.004166		1.72825	-0.068281		-1.48605	-0.042719		-1.53602	0.274935		-1.53921	0.129791
	0.909166	-0.039645		0.911546	0.027283		1.70736	-0.003656		1.72956	-0.06951		-1.48536	-0.043487		-1.53537	0.27401		-1.53857	0.128847
	0.909853	-0.039681		0.912236	0.027652		1.70865	-0.004709		1.73087	-0.070384		-1.48468	-0.043181		-1.53473	0.273692		-1.53792	0.127832
	0.910541	-0.039472		0.912925	0.027621		1.70994	-0.005253		1.73217	-0.070154		-1.48399	-0.043704		-1.53408	0.273193		-1.53728	0.127328
	0.911228	-0.039253		0.913615	0.027118		1.71123	-0.005929		1.73348	-0.06984		-1.48331	-0.043547		-1.53344	0.271927		-1.53664	0.12742
	0.911916	-0.040134		0.914304	0.026729		1.71253	-0.007441		1.73479	-0.070744		-1.48263	-0.043753		-1.53279	0.271246		-1.536	0.127091
	0.912603	-0.040129		0.914993	0.026769		1.71382	-0.007615		1.7361	-0.071301		-1.48194	-0.045001		-1.53214	0.270263		-1.53536	0.126776
	0.91329	-0.039892		0.915683	0.027549		1.71511	-0.007238		1.73741	-0.071686		-1.48126	-0.04536		-1.5315	0.269328		-1.53471	0.1267
	0.913978	-0.039572		0.916372	0.02798		1.7164	-0.006888		1.73871	-0.07198		-1.48058	-0.045106		-1.53085	0.268608		-1.53407	0.126782
	0.914665	-0.038234		0.917061	0.028642		1.71769	-0.006201		1.74002	-0.07149		-1.47989	-0.04523		-1.53021	0.268169		-1.53343	0.126696
	0.915352	-0.037881		0.917751	0.028733		1.71898	-0.005703		1.74133	-0.071457		-1.47921	-0.04478		-1.52956	0.267747		-1.53279	0.126381
	0.916039	-0.038567		0.91844	0.028146		1.72027	-0.005863		1.74264	-0.071619		-1.47852	-0.045026		-1.52891	0.267315		-1.53214	0.126191
	0.916727	-0.039061		0.919129	0.028181		1.72156	-0.005097		1.74395	-0.071879		-1.47784	-0.045374		-1.52827	0.267149		-1.5315	0.125391
	0.917414	-0.038655		0.919819	0.028301		1.72285	-0.003852		1.74525	-0.070919		-1.47716	-0.045604		-1.52762	0.267596		-1.53086	0.124356
	0.918102	-0.037661		0.920508	0.028337		1.72414	-0.002554		1.74656	-0.071683		-1.47647	-0.045609		-1.52698	0.267607		-1.53022	0.123831
	0.918789	-0.036408		0.921198	0.028158		1.72544	-0.00271		1.74787	-0.07119		-1.47579	-0.046077		-1.52633	0.267429		-1.52957	0.124156
	0.919476	-0.035249		0.921887	0.028341		1.72673	-0.002876		1.74918	-0.071063		-1.47511	-0.045978		-1.52569	0.267132		-1.52893	0.123368
	0.920164	-0.035925		0.922576	0.02798		1.72802	-0.002683		1.75048	-0.071821		-1.47442	-0.045864		-1.52504	0.267099		-1.52829	0.123012
	0.920851	-0.035493		0.923266	0.028174		1.72931	-0.003815		1.75179	-0.07158		-1.47374	-0.046084		-1.52439	0.267167		-1.52765	0.122792
	0.921538	-0.035128		0.923955	0.02855		1.7306	-0.002697		1.7531	-0.071557		-1.47305	-0.04587		-1.52375	0.267195		-1.527	0.122988
	0.922225	-0.034808		0.924644	0.027897		1.73189	-0.001775		1.75441	-0.071849		-1.47237	-0.045421		-1.5231	0.267173		-1.52636	0.123301
	0.922913	-0.035061		0.925334	0.028497		1.73318	-0.003366		1.75571	-0.07132		-1.47169	-0.046249		-1.52246	0.267054		-1.52572	0.123674
	0.9236	-0.034926		0.926023	0.029028		1.73447	-0.003289		1.75702	-0.071517		-1.471	-0.046		-1.52181	0.266656		-1.52508	0.123902
	0.924288	-0.034987		0.926713	0.02885		1.73576	-0.004895		1.75833	-0.071926		-1.47032	-0.045415		-1.52117	0.265872		-1.52443	0.124262
	0.924975	-0.035142		0.927402	0.029049		1.73706	-0.005099		1.75964	-0.071987		-1.46963	-0.046212		-1.52052	0.265113		-1.52379	0.123854
	0.925662	-0.034952		0.928092	0.027994		1.73835	-0.007444		1.76095	-0.071852		-1.46895	-0.046919		-1.51987	0.264654		-1.52315	0.123543
	0.92635	-0.034938		0.928781	0.027869		1.73964	-0.00691		1.76225	-0.071506		-1.46827	-0.047758		-1.51923	0.264332		-1.52251	0.123718
	0.927037	-0.034756		0.92947	0.027122		1.74093	-0.005267		1.76356	-0.071023		-1.46758	-0.046998		-1.51858	0.264122		-1.52186	0.123428
	0.927724	-0.035178		0.93016	0.02712		1.74222	-0.005275		1.76487	-0.070994		-1.4669	-0.047142		-1.51794	0.26363		-1.52122	0.123349
	0.928411	-0.034459		0.930849	0.026847		1.74351	-0.004408		1.76618	-0.071512		-1.46622	-0.047212		-1.51729	0.263111		-1.52058	0.123489
	0.929099	-0.033588		0.931538	0.026218		1.7448	-0.003826		1.76749	-0.069772		-1.46553	-0.046923		-1.51665	0.262648		-1.51994	0.122753
	0.929786	-0.033464		0.932228	0.026911		1.74609	-0.003096		1.76879	-0.069488		-1.46485	-0.04794		-1.516	0.261848		-1.5193	0.123467
	0.930474	-0.033562		0.932917	0.026256		1.74738	-0.002034		1.7701	-0.068123		-1.46416	-0.048142		-1.51535	0.261959		-1.51865	0.123059
	0.931161	-0.033049		0.933607	0.026311		1.74867	-0.003123		1.77141	-0.067153		-1.46348	-0.048143		-1.51471	0.261888		-1.51801	0.122285
	0.931848	-0.032696		0.934296	0.025701		1.74996	-0.004976		1.77272	-0.066695		-1.4628	-0.047956		-1.51406	0.261279		-1.51737	0.122589
	0.932536	-0.03204		0.934985	0.025762		1.75126	-0.006125		1.77402	-0.066171		-1.46211	-0.048181		-1.51342	0.260691		-1.51673	0.122266
	0.933223	-0.031807		0.935675	0.026441		1.75255	-0.006124		1.77533	-0.066218		-1.46143	-0.046867		-1.51277	0.259647		-1.51608	0.121255
	0.93391	-0.031584		0.936364	0.026208		1.75384	-0.006713		1.77664	-0.065851		-1.46074	-0.047768		-1.51212	0.258962		-1.51544	0.121731
	0.934597	-0.031139		0.937053	0.026771		1.75513	-0.007237		1.77795	-0.065859		-1.46006	-0.048701		-1.51148	0.258129		-1.5148	0.120318
	0.935285	-0.031275		0.937743	0.02713		1.75642	-0.008345		1.77926	-0.066052		-1.45938	-0.048673		-1.51083	0.257505		-1.51415	0.120021
	0.935972	-0.030525		0.938432	0.026824		1.75771	-0.00794		1.78056	-0.066011		-1.45869	-0.049229		-1.51019	0.256953		-1.51351	0.120933
	0.93666	-0.029283		0.939121	0.026795		1.759	-0.008566		1.78187	-0.065866		-1.45801	-0.0488		-1.50954	0.255947		-1.51287	0.120783
	0.937347	-0.028591		0.939811	0.02731		1.76029	-0.009472		1.78318	-0.065103		-1.45732	-0.047817		-1.5089	0.254746		-1.51223	0.121153
	0.938034	-0.028591		0.9405	0.026525		1.76158	-0.009802		1.78449	-0.066663		-1.45664	-0.047336		-1.50825	0.253127		-1.51158	0.12076
	0.938722	-0.028909		0.94119	0.026374		1.76287	-0.010614		1.7858	-0.067392		-1.45596	-0.046914		-1.5076	0.251586		-1.51094	0.12003
	0.939409	-0.027809		0.941879	0.026498		1.76417	-0.009957		1.7871	-0.067471		-1.45527	-0.046136		-1.50696	0.250577		-1.5103	0.119172
	0.940096	-0.028374		0.942569	0.025372		1.76546	-0.007828		1.78841	-0.067606		-1.45459	-0.046373		-1.50631	0.250624		-1.50966	0.118449
	0.940784	-0.028132		0.943258	0.024937		1.76675	-0.007261		1.78972	-0.067491		-1.45391	-0.046854		-1.50567	0.249986		-1.50902	0.118143
	0.941471	-0.027701		0.943947	0.024867		1.76804	-0.006665		1.79103	-0.067398		-1.45322	-0.046955		-1.50502	0.249229		-1.50837	0.118292
	0.942158	-0.02716		0.944637	0.024767		1.76933	-0.00766		1.79234	-0.066933		-1.45254	-0.047846		-1.50438	0.249161		-1.50773	0.117662
	0.942846	-0.027139		0.945326	0.023913		1.77062	-0.007101		1.79364	-0.065777		-1.45185	-0.047247		-1.50373	0.249292		-1.50709	0.116997
	0.943533	-0.026576		0.946015	0.02351		1.77191	-0.007317		1.79495	-0.066182		-1.45117	-0.046923		-1.50308	0.249463		-1.50645	0.117008
	0.94422	-0.026143		0.946705	0.023193		1.7732	-0.008857		1.79626	-0.066864		-1.45049	-0.046825		-1.50244	0.24889		-1.5058	0.117733
	0.944908	-0.025355		0.947394	0.021927		1.77449	-0.008679		1.79757	-0.067978		-1.4498	-0.046261		-1.50179	0.248554		-1.50516	0.1171
	0.945595	-0.025466		0.948084	0.021081		1.77578	-0.008664		1.79888	-0.067271		-1.44912	-0.046432		-1.50115	0.248887		-1.50452	0.117053
	0.946282	-0.024695		0.948773	0.020895		1.77708	-0.008606		1.80018	-0.068477		-1.44843	-0.047189		-1.5005	0.248969		-1.50388	0.117654
	0.94697	-0.023865		0.949462	0.021215		1.77837	-0.009412		1.80149	-0.067995		-1.44775	-0.047413		-1.49985	0.248775		-1.50323	0.116453
	0.947657	-0.023641		0.950152	0.020124		1.77966	-0.011182		1.8028	-0.067612		-1.44707	-0.046497		-1.49921	0.248725		-1.50259	0.116599
	0.948344	-0.023064		0.950841	0.019629		1.78095	-0.010288		1.80411	-0.068169		-1.44638	-0.045446		-1.49856	0.249112		-1.50195	0.117125
	0.949032	-0.023225		0.95153	0.019093		1.78224	-0.008984		1.80541	-0.069344		-1.4457	-0.04493		-1.49792	0.249543		-1.50131	0.117844
	0.949719	-0.023909		0.95222	0.01873		1.78353	-0.007742		1.80672	-0.070294		-1.44502	-0.045208		-1.49727	0.249743		-1.50066	0.116388
	0.950406	-0.023855		0.952909	0.018494		1.78482	-0.007548		1.80803	-0.069856		-1.44433	-0.045444		-1.49663	0.249733		-1.50002	0.116543
	0.951094	-0.023683		0.953599	0.017127		1.78611	-0.007899		1.80934	-0.069549		-1.44365	-0.04443		-1.49598	0.249592		-1.49938	0.116878
	0.951781	-0.023914		0.954288	0.015994		1.7874	-0.00842		1.81065	-0.06992		-1.44296	-0.043689		-1.49534	0.249338		-1.49874	0.117304
	0.952468	-0.024567		0.954977	0.01632		1.78869	-0.007917		1.81195	-0.069653		-1.44228	-0.043963		-1.49469	0.248661		-1.49809	0.117527
	0.953156	-0.025508		0.955667	0.016909		1.78999	-0.008416		1.81326	-0.07052		-1.4416	-0.043559		-1.49404	0.248425		-1.49745	0.116759
	0.953843	-0.026669		0.956356	0.017418		1.79128	-0.007592		1.81457	-0.07144		-1.44091	-0.043121		-1.4934	0.248119		-1.49681	0.116262
	0.95453	-0.02748		0.957046	0.018041		1.79257	-0.006288		1.81588	-0.071614		-1.44023	-0.04329		-1.49275	0.248509		-1.49617	0.115378
	0.955218	-0.027728		0.957735	0.019052		1.79386	-0.005603		1.81719	-0.071818		-1.43955	-0.043594		-1.49211	0.248697		-1.49552	0.115518
	0.955905	-0.028198		0.958424	0.019716		1.79515	-0.005578		1.81849	-0.070849		-1.43886	-0.043903		-1.49146	0.249123		-1.49488	0.115321
	0.956592	-0.028413		0.959114	0.020116		1.79644	-0.006009		1.8198	-0.070691		-1.43818	-0.044277		-1.49082	0.249322		-1.49424	0.115518
	0.95728	-0.02865		0.959803	0.020397		1.79773	-0.007294		1.82111	-0.071029		-1.43749	-0.044422		-1.49017	0.249133		-1.4936	0.115431
	0.957967	-0.028078		0.960492	0.020404		1.79902	-0.007887		1.82242	-0.070811		-1.43681	-0.044283		-1.48952	0.249029		-1.49296	0.115037
	0.958654	-0.028131		0.961182	0.020679		1.80031	-0.007353		1.82373	-0.071106		-1.43613	-0.044673		-1.48888	0.249642		-1.49231	0.114261
	0.959342	-0.028984		0.961871	0.020604		1.8016	-0.006618		1.82503	-0.071429		-1.43544	-0.045376		-1.48823	0.250763		-1.49167	0.114001
	0.960029	-0.028606		0.962561	0.020654		1.8029	-0.005776		1.82634	-0.071303		-1.43476	-0.045435		-1.48759	0.251079		-1.49103	0.114411
	0.960716	-0.029044		0.96325	0.020571		1.80419	-0.005079		1.82765	-0.070516		-1.43407	-0.044943		-1.48694	0.250686		-1.49039	0.114404
	0.961404	-0.029407		0.963939	0.019663		1.80548	-0.005143		1.82896	-0.069701		-1.43339	-0.045186		-1.48629	0.250803		-1.48974	0.114498
	0.962091	-0.029143		0.964629	0.019306		1.80677	-0.005038		1.83026	-0.068833		-1.43271	-0.045669		-1.48565	0.250496		-1.4891	0.114073
	0.962778	-0.03013		0.965318	0.018614		1.80806	-0.00463		1.83157	-0.069395		-1.43202	-0.045537		-1.485	0.250731		-1.48846	0.112999
	0.963466	-0.030086		0.966007	0.018662		1.80935	-0.003741		1.83288	-0.068852		-1.43134	-0.045298		-1.48436	0.250915		-1.48782	0.112537
	0.964153	-0.030611		0.966697	0.018156		1.81064	-0.002603		1.83419	-0.068827		-1.43066	-0.045363		-1.48371	0.25047		-1.48717	0.112199
	0.96484	-0.030241		0.967386	0.018288		1.81193	-0.00255		1.8355	-0.069658		-1.42997	-0.045566		-1.48307	0.250054		-1.48653	0.112189
	0.965528	-0.029812		0.968076	0.017555		1.81322	-0.002951		1.8368	-0.069213		-1.42929	-0.046075		-1.48242	0.24953		-1.48589	0.112061
	0.966215	-0.030273		0.968765	0.018014		1.81452	-0.002532		1.83811	-0.068279		-1.4286	-0.046386		-1.48177	0.248952		-1.48525	0.111841
	0.966902	-0.031142		0.969455	0.017746		1.8158	-0.002001		1.83942	-0.06755		-1.42792	-0.046174		-1.48113	0.249445		-1.4846	0.111773
	0.96759	-0.031677		0.970144	0.017196		1.8171	-0.001546		1.84073	-0.067901		-1.42724	-0.046646		-1.48048	0.25008		-1.48396	0.111123
	0.968277	-0.031902		0.970833	0.016619		1.81839	-0.000679		1.84204	-0.067511		-1.42655	-0.046979		-1.47984	0.250066		-1.48332	0.110872
	0.968964	-0.03334		0.971523	0.016301		1.81968	0.000308		1.84334	-0.06719		-1.42587	-0.046685		-1.47919	0.25026		-1.48268	0.112002
	0.969652	-0.03397		0.972212	0.015719		1.82097	0.001398		1.84465	-0.066714		-1.42518	-0.046676		-1.47854	0.250692		-1.48203	0.113347
	0.970339	-0.034355		0.972901	0.015908		1.82226	0.00128		1.84596	-0.066476		-1.4245	-0.046893		-1.4779	0.250728		-1.48139	0.113368
	0.971026	-0.034702		0.973591	0.014618		1.82355	0.001153		1.84727	-0.0659		-1.42382	-0.046845		-1.47725	0.251347		-1.48075	0.11221
	0.971714	-0.035627		0.97428	0.014334		1.82484	0.000829		1.84857	-0.06551		-1.42313	-0.047559		-1.47661	0.251615		-1.48011	0.110876
	0.972401	-0.034411		0.974969	0.015367		1.82613	0.000955		1.84988	-0.066131		-1.42245	-0.048583		-1.47596	0.251374		-1.47946	0.110312
	0.973088	-0.033586		0.975659	0.014935		1.82743	0.00066		1.85119	-0.066475		-1.42176	-0.048964		-1.47532	0.251614		-1.47882	0.11042
	0.973776	-0.033266		0.976348	0.013828		1.82872	0.000272		1.8525	-0.064815		-1.42108	-0.049509		-1.47467	0.25196		-1.47818	0.110692
	0.974463	-0.03224		0.977038	0.01366		1.83001	0.000677		1.85381	-0.065897		-1.4204	-0.049776		-1.47402	0.251891		-1.47754	0.110793
	0.97515	-0.031547		0.977727	0.013031		1.8313	0.001888		1.85511	-0.065885		-1.41971	-0.049499		-1.47338	0.252155		-1.47689	0.110807
	0.975838	-0.031702		0.978416	0.012773		1.83259	0.002708		1.85642	-0.065016		-1.41903	-0.049096		-1.47273	0.252344		-1.47625	0.110693
	0.976525	-0.032025		0.979106	0.012542		1.83388	0.002693		1.85773	-0.065254		-1.41835	-0.048805		-1.47209	0.251914		-1.47561	0.11106
	0.977212	-0.031533		0.979795	0.013162		1.83517	0.003044		1.85904	-0.065076		-1.41766	-0.049041		-1.47144	0.251289		-1.47497	0.111531
	0.9779	-0.032465		0.980484	0.013615		1.83646	0.002964		1.86034	-0.06482		-1.41698	-0.049577		-1.4708	0.250693		-1.47432	0.111821
	0.978587	-0.033183		0.981174	0.014208		1.83775	0.003577		1.86165	-0.064409		-1.4163	-0.050302		-1.47015	0.250186		-1.47368	0.111782
	0.979274	-0.033874		0.981863	0.014722		1.83904	0.004322		1.86296	-0.06484		-1.41561	-0.05074		-1.46951	0.249926		-1.47304	0.11161
	0.979962	-0.033603		0.982553	0.015429		1.84034	0.003886		1.86427	-0.063601		-1.41493	-0.051345		-1.46886	0.249545		-1.4724	0.11058
	0.980649	-0.034711		0.983242	0.015745		1.84163	0.002422		1.86558	-0.06507		-1.41424	-0.050839		-1.46821	0.24902		-1.47175	0.109164
	0.981336	-0.034799		0.983932	0.016246		1.84292	0.002809		1.86688	-0.065531		-1.41356	-0.050885		-1.46757	0.248415		-1.47111	0.10939
	0.982024	-0.035266		0.984621	0.016845		1.84421	0.002514		1.86819	-0.065817		-1.41288	-0.051654		-1.46692	0.247679		-1.47047	0.109003
	0.982711	-0.035813		0.98531	0.017271		1.8455	0.002601		1.8695	-0.065505		-1.41219	-0.053043		-1.46628	0.247161		-1.46983	0.107693
	0.983398	-0.0361		0.986	0.017732		1.84679	0.002144		1.87081	-0.065483		-1.41151	-0.054012		-1.46563	0.246044		-1.46918	0.106792
	0.984086	-0.036143		0.986689	0.017595		1.84808	0.001516		1.87212	-0.066229		-1.41082	-0.053822		-1.46498	0.245111		-1.46854	0.107278
	0.984773	-0.035424		0.987378	0.017866		1.84937	0.003528		1.87342	-0.066327		-1.41014	-0.054872		-1.46434	0.244859		-1.4679	0.107728
	0.98546	-0.035571		0.988068	0.017988		1.85066	0.003478		1.87473	-0.0677		-1.40946	-0.056462		-1.46369	0.244173		-1.46726	0.107404
	0.986148	-0.036083		0.988757	0.017291		1.85195	0.002545		1.87604	-0.067803		-1.40877	-0.056442		-1.46305	0.242939		-1.46662	0.107
	0.986835	-0.036082		0.989447	0.016847		1.85325	0.002614		1.87735	-0.068885		-1.40809	-0.05601		-1.4624	0.242386		-1.46597	0.106826
	0.987522	-0.035784		0.990136	0.016439		1.85454	0.003645		1.87865	-0.069495		-1.40741	-0.056874		-1.46175	0.24213		-1.46533	0.106817
	0.98821	-0.035415		0.990825	0.015991		1.85583	0.003153		1.87996	-0.07048		-1.40672	-0.05745		-1.46111	0.241486		-1.46469	0.106798
	0.988897	-0.035226		0.991515	0.015325		1.85712	0.003714		1.88127	-0.070696		-1.40604	-0.057892		-1.46046	0.240239		-1.46405	0.107229
	0.989584	-0.035412		0.992204	0.014103		1.85841	0.003227		1.88258	-0.071265		-1.40535	-0.057052		-1.45982	0.239297		-1.4634	0.107037
	0.990272	-0.03539		0.992893	0.013287		1.8597	0.003036		1.88389	-0.072692		-1.40467	-0.057735		-1.45917	0.238164		-1.46276	0.106851
	0.990959	-0.035296		0.993583	0.012533		1.86099	0.002962		1.88519	-0.072857		-1.40399	-0.058318		-1.45853	0.236937		-1.46212	0.10675
	0.991646	-0.035077		0.994272	0.011717		1.86228	0.003193		1.8865	-0.072451		-1.4033	-0.059123		-1.45788	0.235918		-1.46148	0.106049
	0.992334	-0.035187		0.994962	0.011491		1.86357	0.002297		1.88781	-0.073364		-1.40262	-0.059931		-1.45724	0.236122		-1.46083	0.105789
	0.993021	-0.034885		0.995651	0.012254		1.86486	0.001545		1.88912	-0.075234		-1.40193	-0.060693		-1.45659	0.235048		-1.46019	0.106143
	0.993708	-0.034223		0.99634	0.01225		1.86616	0.001045		1.89043	-0.074122		-1.40125	-0.060861		-1.45594	0.232761		-1.45955	0.106145
	0.994396	-0.034375		0.99703	0.012416		1.86745	-0.000365		1.89173	-0.076082		-1.40057	-0.060945		-1.4553	0.230801		-1.45891	0.105448
	0.995083	-0.033586		0.997719	0.013		1.86874	-0.000861		1.89304	-0.077734		-1.39988	-0.061173		-1.45465	0.23092		-1.45826	0.104719
	0.99577	-0.033549		0.998409	0.012854		1.87003	-0.002511		1.89435	-0.078135		-1.3992	-0.061235		-1.45401	0.229372		-1.45762	0.104081
	0.996458	-0.033159		0.999098	0.012792		1.87132	-0.004022		1.89566	-0.079334		-1.39851	-0.061487		-1.45336	0.228089		-1.45698	0.104019
	0.997145	-0.033274		0.999787	0.013452		1.87261	-0.004155		1.89697	-0.080163		-1.39783	-0.062293		-1.45271	0.22808		-1.45634	0.104485
	0.997832	-0.033054		1.00048	0.013086		1.8739	-0.002709		1.89827	-0.078627		-1.39715	-0.062689		-1.45207	0.22697		-1.45569	0.104615
	0.99852	-0.032187		1.00117	0.013179		1.87519	-0.001747		1.89958	-0.079818		-1.39646	-0.062695		-1.45142	0.226469		-1.45505	0.103907
	0.999207	-0.032265		1.00185	0.013206		1.87648	-0.001953		1.90089	-0.079528		-1.39578	-0.062459		-1.45078	0.226675		-1.45441	0.102883
	0.999894	-0.031961		1.00255	0.01313		1.87777	-0.00203		1.9022	-0.079628		-1.3951	-0.062199		-1.45013	0.225662		-1.45377	0.10261
	1.00058	-0.031693		1.00323	0.01298		1.87907	-0.003343		1.90351	-0.081012		-1.39441	-0.0629		-1.44949	0.225343		-1.45312	0.102449
	1.00127	-0.031442		1.00392	0.013371		1.88036	-0.002618		1.90481	-0.08181		-1.39373	-0.063251		-1.44884	0.225159		-1.45248	0.101746
	1.00196	-0.03223		1.00461	0.01337		1.88165	-0.004773		1.90612	-0.081518		-1.39304	-0.063131		-1.44819	0.224155		-1.45184	0.101824
	1.00264	-0.031922		1.0053	0.013036		1.88294	-0.004517		1.90743	-0.08187		-1.39236	-0.063397		-1.44755	0.223324		-1.4512	0.101754
	1.00333	-0.030725		1.00599	0.013219		1.88423	-0.004094		1.90874	-0.082829		-1.39168	-0.063979		-1.4469	0.22299		-1.45055	0.10084
	1.00402	-0.02992		1.00668	0.013019		1.88552	-0.004945		1.91004	-0.082944		-1.39099	-0.06424		-1.44626	0.221493		-1.44991	0.100471
	1.00471	-0.029069		1.00737	0.012922		1.88681	-0.005647		1.91135	-0.082511		-1.39031	-0.064388		-1.44561	0.220832		-1.44927	0.100537
	1.00539	-0.028831		1.00806	0.013827		1.8881	-0.007176		1.91266	-0.082341		-1.38963	-0.065715		-1.44497	0.219851		-1.44863	0.100543
	1.00608	-0.029432		1.00875	0.013796		1.88939	-0.007893		1.91397	-0.082336		-1.38894	-0.065916		-1.44432	0.218872		-1.44799	0.100595
	1.00677	-0.030198		1.00944	0.013459		1.89068	-0.007472		1.91528	-0.080419		-1.38826	-0.066868		-1.44367	0.218644		-1.44734	0.100613
	1.00745	-0.030744		1.01013	0.01355		1.89197	-0.007988		1.91658	-0.079023		-1.38757	-0.066595		-1.44303	0.217578		-1.4467	0.100361
	1.00814	-0.031735		1.01082	0.014798		1.89327	-0.008647		1.91789	-0.080176		-1.38689	-0.066214		-1.44238	0.216735		-1.44606	0.100252
	1.00883	-0.032171		1.01151	0.015555		1.89456	-0.010113		1.9192	-0.080433		-1.38621	-0.066428		-1.44174	0.215842		-1.44541	0.100698
	1.00952	-0.032161		1.0122	0.015993		1.89585	-0.010306		1.92051	-0.080376		-1.38552	-0.06697		-1.44109	0.215364		-1.44477	0.101022
	1.0102	-0.032302		1.01289	0.017216		1.89714	-0.010529		1.92182	-0.079498		-1.38484	-0.067327		-1.44044	0.214825		-1.44413	0.100656
	1.01089	-0.032298		1.01357	0.017276		1.89843	-0.010058		1.92312	-0.08068		-1.38415	-0.068166		-1.4398	0.214067		-1.44349	0.099996
	1.01158	-0.032224		1.01426	0.016634		1.89972	-0.009818		1.92443	-0.080124		-1.38347	-0.06876		-1.43915	0.214343		-1.44284	0.099526
	1.01227	-0.032022		1.01495	0.015928		1.90101	-0.009385		1.92574	-0.078956		-1.38279	-0.068751		-1.43851	0.214233		-1.4422	0.099076
	1.01295	-0.03165		1.01564	0.016141		1.9023	-0.009187		1.92705	-0.078576		-1.3821	-0.068774		-1.43786	0.213631		-1.44156	0.098656
	1.01364	-0.031808		1.01633	0.015648		1.90359	-0.009034		1.92836	-0.077728		-1.38142	-0.068959		-1.43722	0.212529		-1.44092	0.098632
	1.01433	-0.032132		1.01702	0.015561		1.90488	-0.008634		1.92966	-0.078383		-1.38074	-0.069842		-1.43657	0.21213		-1.44027	0.099281
	1.01502	-0.03186		1.01771	0.014643		1.90618	-0.009796		1.93097	-0.07834		-1.38005	-0.070502		-1.43592	0.211824		-1.43963	0.100264
	1.0157	-0.03206		1.0184	0.014581		1.90747	-0.010422		1.93228	-0.076825		-1.37937	-0.070638		-1.43528	0.210745		-1.43899	0.100462
	1.01639	-0.032142		1.01909	0.014675		1.90876	-0.010141		1.93359	-0.077656		-1.37868	-0.070443		-1.43463	0.210463		-1.43835	0.100821
	1.01708	-0.031854		1.01978	0.01359		1.91005	-0.009814		1.93489	-0.078488		-1.378	-0.070502		-1.43399	0.209763		-1.43771	0.102167
	1.01777	-0.031482		1.02047	0.013862		1.91134	-0.009327		1.9362	-0.078707		-1.37732	-0.070354		-1.43334	0.209438		-1.43706	0.10262
	1.01845	-0.031797		1.02116	0.01442		1.91263	-0.008933		1.93751	-0.07811		-1.37663	-0.070584		-1.4327	0.208796		-1.43642	0.102455
	1.01914	-0.03216		1.02185	0.014274		1.91392	-0.009276		1.93882	-0.078386		-1.37595	-0.070334		-1.43205	0.206729		-1.43578	0.101455
	1.01983	-0.031948		1.02254	0.014737		1.91521	-0.010239		1.94013	-0.078075		-1.37526	-0.069686		-1.43141	0.20628		-1.43514	0.100851
	1.02051	-0.031503		1.02323	0.014925		1.9165	-0.009706		1.94143	-0.077904		-1.37458	-0.070081		-1.43076	0.206171		-1.43449	0.100692
	1.0212	-0.03113		1.02392	0.014573		1.91779	-0.00883		1.94274	-0.078167		-1.3739	-0.070483		-1.43011	0.206156		-1.43385	0.100459
	1.02189	-0.030569		1.0246	0.014203		1.91909	-0.008126		1.94405	-0.078451		-1.37321	-0.069365		-1.42947	0.20564		-1.43321	0.100288
	1.02258	-0.030244		1.0253	0.014246		1.92038	-0.007634		1.94536	-0.078579		-1.37253	-0.069528		-1.42882	0.204731		-1.43257	0.099973
	1.02326	-0.029859		1.02598	0.013882		1.92167	-0.008036		1.94667	-0.078287		-1.37184	-0.069647		-1.42818	0.205139		-1.43192	0.099892
	1.02395	-0.029724		1.02667	0.013999		1.92296	-0.008773		1.94797	-0.078292		-1.37116	-0.06996		-1.42753	0.204571		-1.43128	0.100287
	1.02464	-0.029964		1.02736	0.014532		1.92425	-0.009003		1.94928	-0.078639		-1.37048	-0.070727		-1.42688	0.203816		-1.43064	0.100608
	1.02533	-0.030399		1.02805	0.015169		1.92554	-0.008233		1.95059	-0.077736		-1.36979	-0.071463		-1.42624	0.202605		-1.43	0.100586
	1.02601	-0.030721		1.02874	0.015967		1.92683	-0.007283		1.9519	-0.078681		-1.36911	-0.071376		-1.42559	0.203083		-1.42935	0.10054
	1.0267	-0.03056		1.02943	0.015687		1.92812	-0.007294		1.9532	-0.079384		-1.36843	-0.071686		-1.42495	0.203104		-1.42871	0.101001
	1.02739	-0.030404		1.03012	0.015248		1.92942	-0.007496		1.95451	-0.080053		-1.36774	-0.071867		-1.4243	0.202834		-1.42807	0.101106
	1.02808	-0.030639		1.03081	0.01595		1.9307	-0.007031		1.95582	-0.07874		-1.36706	-0.071844		-1.42366	0.203276		-1.42743	0.10136
	1.02876	-0.030996		1.0315	0.016296		1.932	-0.006612		1.95713	-0.078914		-1.36637	-0.072425		-1.42301	0.203232		-1.42678	0.101924
	1.02945	-0.031457		1.03219	0.016129		1.93329	-0.006802		1.95844	-0.079129		-1.36569	-0.071778		-1.42236	0.202289		-1.42614	0.102289
	1.03014	-0.031539		1.03288	0.015932		1.93458	-0.006201		1.95974	-0.080137		-1.36501	-0.071497		-1.42172	0.201547		-1.4255	0.101998
	1.03082	-0.030984		1.03357	0.016661		1.93587	-0.005166		1.96105	-0.079041		-1.36432	-0.071902		-1.42107	0.201636		-1.42486	0.102926
	1.03151	-0.031281		1.03426	0.016536		1.93716	-0.00401		1.96236	-0.078681		-1.36364	-0.071516		-1.42043	0.200937		-1.42422	0.103042
	1.0322	-0.031918		1.03495	0.017027		1.93845	-0.004476		1.96367	-0.079214		-1.36295	-0.071123		-1.41978	0.200613		-1.42357	0.102915
	1.03289	-0.032374		1.03564	0.016792		1.93974	-0.005469		1.96497	-0.080061		-1.36227	-0.071033		-1.41914	0.200632		-1.42293	0.103007
	1.03357	-0.033187		1.03632	0.017019		1.94103	-0.005099		1.96628	-0.079244		-1.36159	-0.071291		-1.41849	0.2005		-1.42229	0.103728
	1.03426	-0.033996		1.03701	0.016707		1.94233	-0.004782		1.96759	-0.078556		-1.3609	-0.071582		-1.41784	0.199991		-1.42165	0.104283
	1.03495	-0.033971		1.0377	0.016166		1.94362	-0.005368		1.9689	-0.077831		-1.36022	-0.07148		-1.4172	0.199893		-1.421	0.104559
	1.03564	-0.032922		1.03839	0.015358		1.94491	-0.005666		1.97021	-0.077871		-1.35954	-0.07173		-1.41655	0.198281		-1.42036	0.105122
	1.03632	-0.031945		1.03908	0.015627		1.9462	-0.006366		1.97151	-0.078134		-1.35885	-0.071618		-1.41591	0.196911		-1.41972	0.105488
	1.03701	-0.031988		1.03977	0.015875		1.94749	-0.00708		1.97282	-0.077328		-1.35817	-0.071458		-1.41526	0.195904		-1.41908	0.105466
	1.0377	-0.031501		1.04046	0.015362		1.94878	-0.008459		1.97413	-0.077196		-1.35748	-0.071741		-1.41461	0.195217		-1.41843	0.104863
	1.03838	-0.030806		1.04115	0.015447		1.95007	-0.009839		1.97544	-0.077402		-1.3568	-0.072048		-1.41397	0.194553		-1.41779	0.104511
	1.03907	-0.030777		1.04184	0.015677		1.95136	-0.010718		1.97675	-0.076755		-1.35612	-0.07204		-1.41332	0.194007		-1.41715	0.103982
	1.03976	-0.029645		1.04253	0.014824		1.95265	-0.010815		1.97805	-0.076883		-1.35543	-0.071405		-1.41268	0.193912		-1.4165	0.104546
	1.04045	-0.028835		1.04322	0.014642		1.95394	-0.009775		1.97936	-0.078224		-1.35475	-0.070959		-1.41203	0.193779		-1.41586	0.105193
	1.04113	-0.029198		1.04391	0.01469		1.95524	-0.009756		1.98067	-0.078088		-1.35407	-0.070842		-1.41139	0.193805		-1.41522	0.105072
	1.04182	-0.028817		1.0446	0.01416		1.95653	-0.009421		1.98198	-0.0777		-1.35338	-0.071527		-1.41074	0.194329		-1.41458	0.105026
	1.04251	-0.027978		1.04529	0.013245		1.95782	-0.011719		1.98328	-0.078353		-1.3527	-0.072228		-1.4101	0.193844		-1.41394	0.105501
	1.0432	-0.028182		1.04598	0.012819		1.95911	-0.012945		1.98459	-0.078249		-1.35201	-0.072287		-1.40945	0.193262		-1.41329	0.105234
	1.04388	-0.028653		1.04666	0.011948		1.9604	-0.011925		1.9859	-0.078077		-1.35133	-0.071893		-1.4088	0.192123		-1.41265	0.104385
	1.04457	-0.02849		1.04736	0.011224		1.96169	-0.012919		1.98721	-0.078025		-1.35065	-0.071806		-1.40816	0.193078		-1.41201	0.103856
	1.04526	-0.028616		1.04804	0.011139		1.96298	-0.013493		1.98852	-0.077568		-1.34996	-0.071434		-1.40751	0.192746		-1.41137	0.103569
	1.04595	-0.028776		1.04873	0.011317		1.96427	-0.013917		1.98982	-0.077487		-1.34928	-0.070879		-1.40687	0.191399		-1.41072	0.103112
	1.04663	-0.028683		1.04942	0.010615		1.96556	-0.012355		1.99113	-0.077137		-1.34859	-0.071202		-1.40622	0.191136		-1.41008	0.103326
	1.04732	-0.029103		1.05011	0.010398		1.96685	-0.013591		1.99244	-0.076333		-1.34791	-0.072088		-1.40557	0.190071		-1.40944	0.103936
	1.04801	-0.029173		1.0508	0.010715		1.96814	-0.015169		1.99375	-0.076712		-1.34723	-0.072432		-1.40493	0.190353		-1.4088	0.104198
	1.04869	-0.028773		1.05149	0.010129		1.96944	-0.016198		1.99506	-0.077051		-1.34654	-0.072014		-1.40428	0.189927		-1.40815	0.104068
	1.04938	-0.029138		1.05218	0.010077		1.97073	-0.015435		1.99636	-0.077353		-1.34586	-0.071224		-1.40364	0.188858		-1.40751	0.103544
	1.05007	-0.029412		1.05287	0.009733		1.97202	-0.015254		1.99767	-0.078017		-1.34518	-0.070706		-1.40299	0.187799		-1.40687	0.103781
	1.05076	-0.029504		1.05356	0.009278		1.97331	-0.016235		1.99898	-0.078195		-1.34449	-0.070936		-1.40235	0.187859		-1.40623	0.103618
	1.05144	-0.029702		1.05425	0.008999		1.9746	-0.016108		2.00029	-0.077815		-1.34381	-0.0711		-1.4017	0.187767		-1.40558	0.10301
	1.05213	-0.029619		1.05494	0.008758		1.97589	-0.015495		2.0016	-0.078552		-1.34312	-0.070985		-1.40105	0.186849		-1.40494	0.102713
	1.05282	-0.029604		1.05563	0.008551		1.97718	-0.014965		2.0029	-0.078669		-1.34244	-0.070723		-1.40041	0.186531		-1.4043	0.102395
	1.05351	-0.029159		1.05632	0.009266		1.97847	-0.015402		2.00421	-0.078111		-1.34176	-0.07093		-1.39976	0.186986		-1.40366	0.102642
	1.05419	-0.029387		1.05701	0.009016		1.97976	-0.014216		2.00552	-0.077574		-1.34107	-0.072463		-1.39912	0.185993		-1.40301	0.102981
	1.05488	-0.029886		1.0577	0.008503		1.98105	-0.013817		2.00683	-0.077659		-1.34039	-0.072286		-1.39847	0.185297		-1.40237	0.103013
	1.05557	-0.029337		1.05838	0.008122		1.98235	-0.013692		2.00813	-0.077764		-1.3397	-0.072193		-1.39783	0.185178		-1.40173	0.102853
	1.05626	-0.029138		1.05907	0.008629		1.98364	-0.014422		2.00944	-0.077136		-1.33902	-0.073666		-1.39718	0.184493		-1.40109	0.102309
	1.05694	-0.02924		1.05976	0.008062		1.98493	-0.01494		2.01075	-0.076506		-1.33834	-0.072865		-1.39653	0.184011		-1.40044	0.102646
	1.05763	-0.030156		1.06045	0.006923		1.98622	-0.015177		2.01206	-0.076152		-1.33765	-0.073567		-1.39589	0.183268		-1.3998	0.102907
	1.05832	-0.030455		1.06114	0.006585		1.98751	-0.013924		2.01337	-0.076185		-1.33697	-0.073555		-1.39524	0.183101		-1.39916	0.101966
	1.059	-0.029766		1.06183	0.006297		1.9888	-0.013247		2.01467	-0.075997		-1.33628	-0.07216		-1.3946	0.183144		-1.39852	0.101602
	1.05969	-0.028892		1.06252	0.005763		1.99009	-0.010936		2.01598	-0.075596		-1.3356	-0.071058		-1.39395	0.183896		-1.39787	0.101367
	1.06038	-0.028436		1.06321	0.005488		1.99138	-0.009373		2.01729	-0.075235		-1.33492	-0.071234		-1.39331	0.184241		-1.39723	0.1013
	1.06107	-0.028977		1.0639	0.00535		1.99267	-0.009648		2.0186	-0.075293		-1.33423	-0.071526		-1.39266	0.183302		-1.39659	0.100762
	1.06175	-0.029282		1.06459	0.004541		1.99396	-0.008399		2.01991	-0.075925		-1.33355	-0.070491		-1.39201	0.182625		-1.39595	0.100051
	1.06244	-0.029444		1.06528	0.004729		1.99526	-0.008004		2.02121	-0.075417		-1.33287	-0.070053		-1.39137	0.182643		-1.39531	0.099587
	1.06313	-0.029407		1.06597	0.004611		1.99655	-0.007642		2.02252	-0.074984		-1.33218	-0.069474		-1.39072	0.182557		-1.39466	0.099092
	1.06382	-0.029057		1.06666	0.004939		1.99784	-0.007555		2.02383	-0.074833		-1.3315	-0.069751		-1.39008	0.182595		-1.39402	0.099234
	1.0645	-0.028319		1.06735	0.005528		1.99913	-0.008163		2.02514	-0.074347		-1.33081	-0.070406		-1.38943	0.182261		-1.39338	0.099624
	1.06519	-0.027902		1.06804	0.005005		2.00042	-0.007845		2.02644	-0.073765		-1.33013	-0.069862		-1.38878	0.181432		-1.39274	0.09904
	1.06588	-0.027928		1.06873	0.004682		2.00171	-0.007101		2.02775	-0.073845		-1.32945	-0.069172		-1.38814	0.180671		-1.39209	0.098532
	1.06657	-0.027915		1.06942	0.004536		2.003	-0.006096		2.02906	-0.074134		-1.32876	-0.069694		-1.38749	0.179917		-1.39145	0.098482
	1.06725	-0.027893		1.0701	0.004432		2.00429	-0.005054		2.03037	-0.074438		-1.32808	-0.070347		-1.38685	0.178835		-1.39081	0.098582
	1.06794	-0.027593		1.07079	0.005037		2.00558	-0.004528		2.03168	-0.075517		-1.3274	-0.070377		-1.3862	0.178026		-1.39017	0.098558
	1.06863	-0.027371		1.07148	0.004646		2.00687	-0.004209		2.03299	-0.075727		-1.32671	-0.069515		-1.38556	0.177479		-1.38952	0.098521
	1.06932	-0.027002		1.07217	0.005408		2.00816	-0.003986		2.03429	-0.075576		-1.32603	-0.069482		-1.38491	0.177212		-1.38888	0.098485
	1.07	-0.027411		1.07286	0.005007		2.00946	-0.004166		2.0356	-0.07523		-1.32534	-0.069825		-1.38426	0.177489		-1.38824	0.098324
	1.07069	-0.027679		1.07355	0.005372		2.01075	-0.00516		2.03691	-0.074837		-1.32466	-0.069699		-1.38362	0.178063		-1.3876	0.098717
	1.07138	-0.027544		1.07424	0.005744		2.01204	-0.006044		2.03822	-0.075054		-1.32398	-0.070218		-1.38297	0.179194		-1.38695	0.097971
	1.07206	-0.028314		1.07493	0.006005		2.01333	-0.006253		2.03952	-0.074201		-1.32329	-0.070439		-1.38233	0.180021		-1.38631	0.098808
	1.07275	-0.029716		1.07562	0.005855		2.01462	-0.005636		2.04083	-0.074227		-1.32261	-0.070905		-1.38168	0.179961		-1.38567	0.098967
	1.07344	-0.030555		1.07631	0.004727		2.01591	-0.00447		2.04214	-0.074977		-1.32193	-0.070839		-1.38104	0.179449		-1.38503	0.098384
	1.07413	-0.030996		1.077	0.003499		2.0172	-0.004166		2.04345	-0.07437		-1.32124	-0.071061		-1.38039	0.179246		-1.38438	0.097787
	1.07481	-0.031134		1.07769	0.003008		2.01849	-0.003372		2.04475	-0.074177		-1.32056	-0.071279		-1.37974	0.179018		-1.38374	0.097189
	1.0755	-0.030726		1.07838	0.002796		2.01979	-0.002802		2.04606	-0.074468		-1.31987	-0.071599		-1.3791	0.178232		-1.3831	0.097625
	1.07619	-0.030921		1.07907	0.003212		2.02108	-0.001704		2.04737	-0.074364		-1.31919	-0.071902		-1.37845	0.177474		-1.38246	0.097655
	1.07688	-0.031437		1.07976	0.002726		2.02237	0.00095		2.04868	-0.073441		-1.31851	-0.071395		-1.37781	0.177388		-1.38181	0.0971
	1.07756	-0.031954		1.08045	0.002205		2.02366	0.001619		2.04999	-0.073434		-1.31782	-0.070676		-1.37716	0.17725		-1.38117	0.094786
	1.07825	-0.031798		1.08113	0.001748		2.02495	0.002271		2.0513	-0.072768		-1.31714	-0.070996		-1.37651	0.17696		-1.38053	0.094717
	1.07894	-0.031422		1.08182	0.001624		2.02624	0.002476		2.0526	-0.07217		-1.31645	-0.071458		-1.37587	0.176139		-1.37989	0.09523
	1.07963	-0.030933		1.08251	0.000969		2.02753	0.002215		2.05391	-0.071715		-1.31577	-0.07148		-1.37522	0.175651		-1.37924	0.095153
	1.08031	-0.030581		1.0832	0.00049		2.02882	0.002861		2.05522	-0.071276		-1.31509	-0.07197		-1.37458	0.175723		-1.3786	0.095803
	1.081	-0.030113		1.08389	0.001369		2.03011	0.002847		2.05653	-0.071193		-1.3144	-0.072792		-1.37393	0.175711		-1.37796	0.095552
	1.08169	-0.029876		1.08458	0.001845		2.0314	0.002698		2.05783	-0.071472		-1.31372	-0.07183		-1.37329	0.17621		-1.37732	0.095058
	1.08238	-0.029862		1.08527	0.001999		2.03269	0.002779		2.05914	-0.071746		-1.31303	-0.071408		-1.37264	0.176701		-1.37668	0.094582
	1.08306	-0.02978		1.08596	0.002047		2.03399	0.0031		2.06045	-0.071794		-1.31235	-0.072339		-1.372	0.176792		-1.37603	0.094401
	1.08375	-0.029518		1.08665	0.001975		2.03528	0.003285		2.06176	-0.071479		-1.31167	-0.072908		-1.37135	0.176728		-1.37539	0.094587
	1.08444	-0.029451		1.08734	0.002291		2.03657	0.003028		2.06307	-0.070861		-1.31098	-0.07401		-1.3707	0.17692		-1.37475	0.094614
	1.08512	-0.029057		1.08803	0.002472		2.03786	0.002655		2.06437	-0.070658		-1.3103	-0.074483		-1.37006	0.176795		-1.3741	0.093888
	1.08581	-0.028513		1.08872	0.002163		2.03915	0.002847		2.06568	-0.07064		-1.30961	-0.074802		-1.36941	0.175592		-1.37346	0.093684
	1.0865	-0.027789		1.08941	0.001953		2.04044	0.003526		2.06699	-0.070511		-1.30893	-0.075083		-1.36877	0.174973		-1.37282	0.09323
	1.08719	-0.027779		1.0901	0.001909		2.04173	0.004114		2.0683	-0.070146		-1.30825	-0.075038		-1.36812	0.174896		-1.37218	0.092755
	1.08787	-0.027748		1.09079	0.002		2.04302	0.004527		2.06961	-0.069372		-1.30756	-0.075201		-1.36747	0.174527		-1.37153	0.092305
	1.08856	-0.026775		1.09147	0.002514		2.04431	0.004486		2.07091	-0.069775		-1.30688	-0.075041		-1.36683	0.174166		-1.37089	0.092542
	1.08925	-0.0267		1.09217	0.003512		2.04561	0.00297		2.07222	-0.069055		-1.3062	-0.075719		-1.36618	0.173982		-1.37025	0.092506
	1.08994	-0.027351		1.09285	0.003598		2.0469	0.002456		2.07353	-0.070888		-1.30551	-0.076379		-1.36554	0.173502		-1.36961	0.091618
	1.09062	-0.02834		1.09354	0.003252		2.04819	0.003483		2.07484	-0.072916		-1.30483	-0.07653		-1.36489	0.172885		-1.36896	0.091419
	1.09131	-0.027406		1.09423	0.003684		2.04948	0.003748		2.07614	-0.073036		-1.30415	-0.077299		-1.36425	0.17268		-1.36832	0.091582
	1.092	-0.026687		1.09492	0.003926		2.05077	0.005252		2.07745	-0.0734		-1.30346	-0.076799		-1.3636	0.172307		-1.36768	0.090818
	1.09268	-0.027026		1.09561	0.003537		2.05206	0.005912		2.07876	-0.07345		-1.30278	-0.078401		-1.36295	0.171435		-1.36704	0.090374
	1.09337	-0.027546		1.0963	0.003149		2.05335	0.006652		2.08007	-0.07222		-1.30209	-0.080064		-1.36231	0.170613		-1.3664	0.089759
	1.09406	-0.027423		1.09699	0.003318		2.05464	0.00556		2.08138	-0.071773		-1.30141	-0.08094		-1.36166	0.169837		-1.36575	0.089958
	1.09475	-0.027136		1.09768	0.003195		2.05593	0.004995		2.08268	-0.072		-1.30073	-0.080719		-1.36102	0.169021		-1.36511	0.088905
	1.09543	-0.027655		1.09837	0.003195		2.05722	0.005051		2.08399	-0.072847		-1.30004	-0.080758		-1.36037	0.168753		-1.36447	0.089027
	1.09612	-0.026992		1.09906	0.001762		2.05851	0.004312		2.0853	-0.073304		-1.29936	-0.081269		-1.35973	0.168677		-1.36383	0.088999
	1.09681	-0.027157		1.09975	0.000279		2.05981	0.003295		2.08661	-0.073723		-1.29867	-0.08179		-1.35908	0.168585		-1.36318	0.088935
	1.0975	-0.027015		1.10044	-0.000366		2.0611	0.002426		2.08792	-0.074542		-1.29799	-0.082031		-1.35843	0.168307		-1.36254	0.088876
	1.09818	-0.027249		1.10113	-0.001031		2.06239	0.001907		2.08922	-0.075393		-1.29731	-0.082344		-1.35779	0.167653		-1.3619	0.089393
	1.09887	-0.028199		1.10182	-0.000853		2.06368	0.00093		2.09053	-0.077527		-1.29662	-0.083232		-1.35714	0.167749		-1.36126	0.089321
	1.09956	-0.027877		1.10251	-0.001607		2.06497	-0.000888		2.09184	-0.07832		-1.29594	-0.084278		-1.3565	0.16836		-1.36061	0.08801
	1.10024	-0.027957		1.10319	-0.002325		2.06626	-0.002881		2.09315	-0.078817		-1.29526	-0.084844		-1.35585	0.168815		-1.35997	0.088376
	1.10093	-0.027361		1.10388	-0.002422		2.06755	-0.004334		2.09445	-0.07949		-1.29457	-0.084483		-1.3552	0.169157		-1.35933	0.088168
	1.10162	-0.027241		1.10457	-0.002626		2.06884	-0.004417		2.09576	-0.080168		-1.29389	-0.08407		-1.35456	0.169663		-1.35869	0.08813
	1.10231	-0.026598		1.10526	-0.00235		2.07013	-0.004831		2.09707	-0.080918		-1.2932	-0.084677		-1.35391	0.169401		-1.35804	0.088564
	1.10299	-0.026879		1.10595	-0.003372		2.07143	-0.005428		2.09838	-0.080634		-1.29252	-0.085298		-1.35327	0.169312		-1.3574	0.088641
	1.10368	-0.026943		1.10664	-0.002469		2.07272	-0.006841		2.09969	-0.081181		-1.29184	-0.085807		-1.35262	0.169114		-1.35676	0.08763
	1.10437	-0.027044		1.10733	-0.00313		2.07401	-0.007841		2.10099	-0.08245		-1.29115	-0.086456		-1.35198	0.168645		-1.35612	0.087705
	1.10506	-0.027777		1.10802	-0.003234		2.0753	-0.00866		2.1023	-0.083157		-1.29047	-0.086996		-1.35133	0.168043		-1.35547	0.087268
	1.10574	-0.028107		1.10871	-0.003287		2.07659	-0.009089		2.10361	-0.08268		-1.28978	-0.08687		-1.35068	0.167035		-1.35483	0.087461
	1.10643	-0.02772		1.1094	-0.003941		2.07788	-0.00909		2.10492	-0.081981		-1.2891	-0.085923		-1.35004	0.165628		-1.35419	0.087182
	1.10712	-0.027451		1.11009	-0.003807		2.07917	-0.010057		2.10622	-0.082152		-1.28842	-0.084815		-1.34939	0.164538		-1.35355	0.087547
	1.10781	-0.027283		1.11078	-0.003295		2.08046	-0.010857		2.10753	-0.082817		-1.28773	-0.084761		-1.34875	0.164652		-1.35291	0.08892
	1.10849	-0.028041		1.11147	-0.002684		2.08175	-0.01178		2.10884	-0.082784		-1.28705	-0.085219		-1.3481	0.164646		-1.35226	0.089297
	1.10918	-0.028466		1.11216	-0.00254		2.08304	-0.012688		2.11015	-0.081627		-1.28636	-0.085145		-1.34746	0.164793		-1.35162	0.089269
	1.10987	-0.028943		1.11285	-0.002463		2.08433	-0.01375		2.11146	-0.080435		-1.28568	-0.084862		-1.34681	0.165577		-1.35098	0.088959
	1.11055	-0.028773		1.11353	-0.002145		2.08563	-0.014202		2.11277	-0.081767		-1.285	-0.085285		-1.34616	0.16621		-1.35034	0.08906
	1.11124	-0.029317		1.11423	-0.001737		2.08692	-0.014144		2.11407	-0.083597		-1.28431	-0.085659		-1.34552	0.166303		-1.34969	0.089457
	1.11193	-0.029502		1.11491	-0.001545		2.08821	-0.015041		2.11538	-0.083975		-1.28363	-0.086815		-1.34487	0.166767		-1.34905	0.091018
	1.11262	-0.030055		1.1156	-0.001421		2.0895	-0.015288		2.11669	-0.083977		-1.28295	-0.08731		-1.34423	0.166104		-1.34841	0.090817
	1.1133	-0.030443		1.11629	-0.001341		2.09079	-0.015356		2.118	-0.084632		-1.28226	-0.087342		-1.34358	0.165768		-1.34777	0.090118
	1.11399	-0.031306		1.11698	-0.001023		2.09208	-0.015661		2.1193	-0.085337		-1.28158	-0.087798		-1.34294	0.165739		-1.34712	0.090091
	1.11468	-0.031659		1.11767	-0.001104		2.09337	-0.014828		2.12061	-0.085478		-1.28089	-0.08819		-1.34229	0.165603		-1.34648	0.08995
	1.11537	-0.032934		1.11836	-0.001678		2.09466	-0.015181		2.12192	-0.085265		-1.28021	-0.088261		-1.34164	0.16553		-1.34584	0.09003
	1.11605	-0.032815		1.11905	-0.002605		2.09595	-0.015707		2.12323	-0.084525		-1.27953	-0.08819		-1.341	0.165272		-1.34519	0.08937
	1.11674	-0.032966		1.11974	-0.003331		2.09725	-0.015373		2.12454	-0.083827		-1.27884	-0.087363		-1.34035	0.164294		-1.34455	0.088571
	1.11743	-0.032759		1.12043	-0.002945		2.09854	-0.014542		2.12584	-0.083737		-1.27816	-0.086985		-1.33971	0.163646		-1.34391	0.08842
	1.11812	-0.033173		1.12112	-0.003323		2.09983	-0.0135		2.12715	-0.084031		-1.27747	-0.087425		-1.33906	0.163036		-1.34327	0.087684
	1.1188	-0.033748		1.12181	-0.004112		2.10112	-0.013745		2.12846	-0.083517		-1.27679	-0.087758		-1.33841	0.163116		-1.34263	0.087661
	1.11949	-0.034399		1.1225	-0.003802		2.10241	-0.013477		2.12977	-0.083151		-1.27611	-0.088363		-1.33777	0.162504		-1.34198	0.087469
	1.12018	-0.035118		1.12319	-0.003858		2.1037	-0.012103		2.13108	-0.082922		-1.27542	-0.088613		-1.33712	0.161427		-1.34134	0.087278
	1.12087	-0.035418		1.12388	-0.003668		2.10499	-0.011162		2.13238	-0.084542		-1.27474	-0.088621		-1.33648	0.162245		-1.3407	0.087904
	1.12155	-0.035631		1.12457	-0.004526		2.10628	-0.011732		2.13369	-0.085067		-1.27406	-0.088637		-1.33583	0.162847		-1.34006	0.088955
	1.12224	-0.036629		1.12525	-0.004312		2.10757	-0.012248		2.135	-0.083624		-1.27337	-0.088255		-1.33519	0.162433		-1.33941	0.088615
	1.12293	-0.037402		1.12594	-0.004806		2.10887	-0.012139		2.13631	-0.085334		-1.27269	-0.087738		-1.33454	0.161828		-1.33877	0.088708
	1.12362	-0.038619		1.12663	-0.004917		2.11015	-0.011797		2.13761	-0.085308		-1.272	-0.087643		-1.3339	0.161551		-1.33813	0.089477
	1.1243	-0.038043		1.12732	-0.004921		2.11145	-0.011768		2.13892	-0.085008		-1.27132	-0.087152		-1.33325	0.160338		-1.33749	0.090806
	1.12499	-0.037674		1.12801	-0.00526		2.11274	-0.011748		2.14023	-0.082507		-1.27064	-0.08686		-1.3326	0.159929		-1.33684	0.0911
	1.12568	-0.038762		1.1287	-0.005453		2.11403	-0.011685		2.14154	-0.082172		-1.26995	-0.086514		-1.33196	0.159667		-1.3362	0.090744
	1.12636	-0.039985		1.12939	-0.005775		2.11532	-0.011436		2.14285	-0.082714		-1.26927	-0.085956		-1.33131	0.15871		-1.33556	0.090047
	1.12705	-0.040321		1.13008	-0.004859		2.11661	-0.010524		2.14415	-0.084599		-1.26859	-0.084921		-1.33067	0.158603		-1.33492	0.090019
	1.12774	-0.040152		1.13077	-0.005473		2.1179	-0.009507		2.14546	-0.084286		-1.2679	-0.084045		-1.33002	0.158476		-1.33427	0.090802
	1.12843	-0.0408		1.13146	-0.005843		2.11919	-0.009233		2.14677	-0.08297		-1.26722	-0.083351		-1.32937	0.158302		-1.33363	0.090251
	1.12911	-0.041417		1.13215	-0.005047		2.12048	-0.01081		2.14808	-0.082867		-1.26653	-0.083163		-1.32873	0.158171		-1.33299	0.089792
	1.1298	-0.041004		1.13284	-0.004782		2.12177	-0.012143		2.14939	-0.082429		-1.26585	-0.082845		-1.32808	0.158144		-1.33235	0.089641
	1.13049	-0.041265		1.13353	-0.003999		2.12306	-0.011869		2.15069	-0.082454		-1.26517	-0.082657		-1.32744	0.158332		-1.3317	0.089656
	1.13118	-0.041298		1.13422	-0.003827		2.12436	-0.01202		2.152	-0.082581		-1.26448	-0.082281		-1.32679	0.158095		-1.33106	0.089932
	1.13186	-0.04183		1.13491	-0.003882		2.12565	-0.012913		2.15331	-0.084001		-1.2638	-0.082509		-1.32615	0.157233		-1.33042	0.089989
	1.13255	-0.041439		1.1356	-0.003385		2.12694	-0.011742		2.15462	-0.084824		-1.26311	-0.0823		-1.3255	0.157014		-1.32978	0.089284
	1.13324	-0.041372		1.13628	-0.003366		2.12823	-0.011003		2.15592	-0.084439		-1.26243	-0.08189		-1.32485	0.157331		-1.32913	0.089505
	1.13392	-0.041607		1.13698	-0.00337		2.12952	-0.010179		2.15723	-0.084627		-1.26175	-0.081807		-1.32421	0.156733		-1.32849	0.089878
	1.13461	-0.041895		1.13766	-0.003582		2.13081	-0.009906		2.15854	-0.084626		-1.26106	-0.081422		-1.32356	0.156086		-1.32785	0.08916
	1.1353	-0.042921		1.13835	-0.003695		2.1321	-0.010501		2.15985	-0.084249		-1.26038	-0.081639		-1.32292	0.155428		-1.32721	0.089007
	1.13599	-0.043095		1.13904	-0.004286		2.13339	-0.011049		2.16116	-0.084301		-1.2597	-0.08202		-1.32227	0.154429		-1.32656	0.088614
	1.13667	-0.042859		1.13973	-0.004169		2.13469	-0.011823		2.16246	-0.083837		-1.25901	-0.082412		-1.32163	0.154292		-1.32592	0.0876
	1.13736	-0.042897		1.14042	-0.004122		2.13598	-0.012431		2.16377	-0.08422		-1.25833	-0.082868		-1.32098	0.154513		-1.32528	0.086858
	1.13805	-0.04359		1.14111	-0.003996		2.13727	-0.012223		2.16508	-0.082616		-1.25764	-0.082802		-1.32033	0.154056		-1.32464	0.087115
	1.13874	-0.043206		1.1418	-0.003075		2.13856	-0.010993		2.16639	-0.081551		-1.25696	-0.082811		-1.31969	0.153559		-1.324	0.087261
	1.13942	-0.043038		1.14249	-0.003377		2.13985	-0.010115		2.1677	-0.081001		-1.25628	-0.082891		-1.31904	0.153439		-1.32335	0.087291
	1.14011	-0.042984		1.14318	-0.003553		2.14114	-0.009257		2.169	-0.080616		-1.25559	-0.083228		-1.3184	0.153148		-1.32271	0.08703
	1.1408	-0.04324		1.14387	-0.00235		2.14243	-0.009939		2.17031	-0.079949		-1.25491	-0.083738		-1.31775	0.153057		-1.32207	0.086827
	1.14149	-0.043982		1.14456	-0.002208		2.14372	-0.009928		2.17162	-0.07928		-1.25422	-0.08375		-1.3171	0.152805		-1.32143	0.086696
	1.14217	-0.044015		1.14525	-0.001785		2.14501	-0.010258		2.17293	-0.079148		-1.25354	-0.083656		-1.31646	0.151896		-1.32078	0.085645
	1.14286	-0.043239		1.14594	-0.001959		2.1463	-0.009793		2.17423	-0.078984		-1.25286	-0.083554		-1.31581	0.151414		-1.32014	0.084594
	1.14355	-0.043274		1.14663	-0.001474		2.14759	-0.009258		2.17554	-0.079031		-1.25217	-0.083418		-1.31517	0.149915		-1.3195	0.084154
	1.14423	-0.043008		1.14732	-0.002372		2.14889	-0.010309		2.17685	-0.079461		-1.25149	-0.083163		-1.31452	0.148632		-1.31886	0.084214
	1.14492	-0.042668		1.148	-0.003014		2.15018	-0.011888		2.17816	-0.080265		-1.2508	-0.082918		-1.31388	0.147457		-1.31821	0.08404
	1.14561	-0.041374		1.14869	-0.003114		2.15147	-0.011002		2.17947	-0.080884		-1.25012	-0.082856		-1.31323	0.146618		-1.31757	0.083291
	1.1463	-0.041019		1.14938	-0.002826		2.15276	-0.009641		2.18077	-0.0816		-1.24944	-0.082435		-1.31258	0.145888		-1.31693	0.08291
	1.14698	-0.040316		1.15007	-0.003293		2.15405	-0.008019		2.18208	-0.082778		-1.24875	-0.081979		-1.31194	0.146373		-1.31629	0.083149
	1.14767	-0.040269		1.15076	-0.003202		2.15534	-0.007131		2.18339	-0.082408		-1.24807	-0.08172		-1.31129	0.146196		-1.31564	0.083375
	1.14836	-0.040214		1.15145	-0.003674		2.15663	-0.008105		2.1847	-0.081766		-1.24739	-0.081481		-1.31065	0.145601		-1.315	0.083884
	1.14905	-0.039956		1.15214	-0.004672		2.15792	-0.009038		2.18601	-0.080989		-1.2467	-0.081095		-1.31	0.144721		-1.31436	0.084075
	1.14973	-0.039179		1.15283	-0.004592		2.15921	-0.011753		2.18731	-0.080282		-1.24602	-0.081516		-1.30936	0.143568		-1.31372	0.083671
	1.15042	-0.038895		1.15352	-0.003892		2.1605	-0.010626		2.18862	-0.079738		-1.24534	-0.082826		-1.30871	0.143131		-1.31307	0.083509
	1.15111	-0.038343		1.15421	-0.003478		2.1618	-0.010796		2.18993	-0.079883		-1.24465	-0.083532		-1.30807	0.14284		-1.31243	0.083733
	1.15179	-0.038735		1.1549	-0.003954		2.16309	-0.011244		2.19124	-0.080163		-1.24397	-0.083537		-1.30742	0.142259		-1.31179	0.0833
	1.15248	-0.038083		1.15559	-0.003956		2.16438	-0.010581		2.19254	-0.079972		-1.24328	-0.083544		-1.30677	0.141959		-1.31115	0.082648
	1.15317	-0.037579		1.15628	-0.003638		2.16567	-0.009381		2.19385	-0.080615		-1.2426	-0.08341		-1.30613	0.140721		-1.3105	0.082279
	1.15386	-0.037382		1.15697	-0.003702		2.16696	-0.009241		2.19516	-0.080991		-1.24192	-0.083229		-1.30548	0.141039		-1.30986	0.082241
	1.15454	-0.037653		1.15766	-0.003936		2.16825	-0.009463		2.19647	-0.079956		-1.24123	-0.083111		-1.30484	0.140899		-1.30922	0.082346
	1.15523	-0.037419		1.15834	-0.004706		2.16954	-0.009093		2.19778	-0.079853		-1.24055	-0.083389		-1.30419	0.140796		-1.30858	0.082493
	1.15592	-0.036954		1.15904	-0.00527		2.17083	-0.009379		2.19909	-0.080743		-1.23986	-0.083632		-1.30354	0.139963		-1.30793	0.082079
	1.15661	-0.035978		1.15972	-0.005352		2.17212	-0.010593		2.20039	-0.080825		-1.23918	-0.084055		-1.3029	0.140255		-1.30729	0.082683
	1.15729	-0.035222		1.16041	-0.005627		2.17341	-0.011819		2.2017	-0.081006		-1.2385	-0.084426		-1.30225	0.140087		-1.30665	0.082753
	1.15798	-0.034918		1.1611	-0.005639		2.17471	-0.011474		2.20301	-0.082632		-1.23781	-0.084365		-1.30161	0.139614		-1.30601	0.081219
	1.15867	-0.035149		1.16179	-0.005626		2.176	-0.011416		2.20432	-0.083647		-1.23713	-0.084878		-1.30096	0.140045		-1.30536	0.079573
	1.15936	-0.034733		1.16248	-0.005638		2.17729	-0.011509		2.20562	-0.084037		-1.23644	-0.085321		-1.30032	0.140255		-1.30472	0.079267
	1.16004	-0.033883		1.16317	-0.004748		2.17858	-0.012532		2.20693	-0.08467		-1.23576	-0.085169		-1.29967	0.140218		-1.30408	0.079079
	1.16073	-0.032729		1.16386	-0.004386		2.17987	-0.013464		2.20824	-0.08383		-1.23508	-0.084954		-1.29902	0.140024		-1.30344	0.079314
	1.16142	-0.032678		1.16455	-0.004743		2.18116	-0.013552		2.20955	-0.08269		-1.23439	-0.085922		-1.29838	0.139777		-1.30279	0.079136
	1.1621	-0.033026		1.16524	-0.003899		2.18245	-0.012922		2.21086	-0.08222		-1.23371	-0.08568		-1.29773	0.140121		-1.30215	0.078339
	1.16279	-0.033275		1.16593	-0.003799		2.18374	-0.012596		2.21216	-0.081382		-1.23303	-0.08689		-1.29709	0.139914		-1.30151	0.07815
	1.16348	-0.032644		1.16662	-0.004253		2.18503	-0.012128		2.21347	-0.08058		-1.23234	-0.086382		-1.29644	0.139381		-1.30087	0.078799
	1.16417	-0.031458		1.16731	-0.003842		2.18633	-0.012672		2.21478	-0.080568		-1.23166	-0.087053		-1.2958	0.138855		-1.30022	0.079135
	1.16485	-0.031014		1.168	-0.003797		2.18762	-0.012976		2.21609	-0.080784		-1.23097	-0.086741		-1.29515	0.137777		-1.29958	0.079268
	1.16554	-0.031131		1.16869	-0.004001		2.18891	-0.012513		2.21739	-0.080126		-1.23029	-0.086668		-1.2945	0.136602		-1.29894	0.078729
	1.16623	-0.031209		1.16938	-0.003393		2.1902	-0.010792		2.2187	-0.079106		-1.22961	-0.08709		-1.29386	0.136428		-1.2983	0.077867
	1.16692	-0.030958		1.17006	-0.00326		2.19149	-0.009332		2.22001	-0.078687		-1.22892	-0.086343		-1.29321	0.136041		-1.29766	0.077334
	1.1676	-0.031004		1.17075	-0.003565		2.19278	-0.010523		2.22132	-0.078911		-1.22824	-0.087193		-1.29257	0.135717		-1.29701	0.077133
	1.16829	-0.031306		1.17144	-0.003723		2.19407	-0.010404		2.22263	-0.078446		-1.22755	-0.087403		-1.29192	0.135419		-1.29637	0.076846
	1.16898	-0.030698		1.17213	-0.003955		2.19536	-0.010155		2.22393	-0.077895		-1.22687	-0.088628		-1.29127	0.134405		-1.29573	0.07659
	1.16967	-0.030451		1.17282	-0.004355		2.19665	-0.010287		2.22524	-0.077136		-1.22619	-0.088764		-1.29063	0.134262		-1.29509	0.076772
	1.17035	-0.030411		1.17351	-0.004961		2.19794	-0.011572		2.22655	-0.076632		-1.2255	-0.088947		-1.28998	0.134437		-1.29444	0.076501
	1.17104	-0.030649		1.1742	-0.005281		2.19923	-0.011122		2.22786	-0.076791		-1.22482	-0.089447		-1.28934	0.134417		-1.2938	0.07615
	1.17173	-0.030532		1.17489	-0.004526		2.20052	-0.010878		2.22917	-0.076808		-1.22413	-0.088752		-1.28869	0.134294		-1.29316	0.076347
	1.17241	-0.029888		1.17558	-0.005878		2.20182	-0.011274		2.23047	-0.076343		-1.22345	-0.087635		-1.28805	0.134482		-1.29252	0.076527
	1.1731	-0.030458		1.17627	-0.006838		2.20311	-0.011051		2.23178	-0.075955		-1.22277	-0.08739		-1.2874	0.134037		-1.29187	0.076193
	1.17379	-0.030493		1.17696	-0.007892		2.2044	-0.009913		2.23309	-0.076358		-1.22208	-0.087059		-1.28676	0.133283		-1.29123	0.075946
	1.17448	-0.030252		1.17765	-0.007768		2.20569	-0.008828		2.2344	-0.075706		-1.2214	-0.086101		-1.28611	0.132702		-1.29059	0.076337
	1.17517	-0.030049		1.17834	-0.008413		2.20698	-0.008652		2.2357	-0.073446		-1.22072	-0.086509		-1.28546	0.132383		-1.28995	0.076449
	1.17585	-0.029438		1.17903	-0.008928		2.20827	-0.008338		2.23701	-0.071556		-1.22003	-0.086591		-1.28482	0.132778		-1.2893	0.075826
	1.17654	-0.029524		1.17972	-0.009258		2.20956	-0.007987		2.23832	-0.070903		-1.21935	-0.087092		-1.28417	0.133375		-1.28866	0.075938
	1.17723	-0.029154		1.18041	-0.008984		2.21085	-0.006514		2.23963	-0.070718		-1.21867	-0.086834		-1.28353	0.133344		-1.28802	0.07593
	1.17791	-0.029116		1.1811	-0.010022		2.21215	-0.005486		2.24094	-0.070459		-1.21798	-0.087754		-1.28288	0.133648		-1.28738	0.075828
	1.1786	-0.029436		1.18178	-0.009645		2.21344	-0.005343		2.24224	-0.070286		-1.2173	-0.088621		-1.28223	0.133245		-1.28673	0.075425
	1.17929	-0.028847		1.18247	-0.009398		2.21473	-0.005769		2.24355	-0.068397		-1.21661	-0.088379		-1.28159	0.132752		-1.28609	0.075588
	1.17998	-0.029845		1.18316	-0.009482		2.21602	-0.006383		2.24486	-0.066897		-1.21593	-0.088907		-1.28094	0.132172		-1.28545	0.07628
	1.18066	-0.030043		1.18385	-0.00977		2.21731	-0.006871		2.24617	-0.066126		-1.21524	-0.088622		-1.2803	0.131829		-1.28481	0.07661
	1.18135	-0.030277		1.18454	-0.009561		2.2186	-0.00677		2.24748	-0.063919		-1.21456	-0.089086		-1.27965	0.131559		-1.28416	0.077012
	1.18204	-0.030379		1.18523	-0.009765		2.21989	-0.005355		2.24878	-0.062944		-1.21388	-0.089738		-1.27901	0.130991		-1.28352	0.076786
	1.18273	-0.029543		1.18592	-0.00988		2.22118	-0.00444		2.25009	-0.062815		-1.21319	-0.089468		-1.27836	0.130889		-1.28288	0.075763
	1.18341	-0.02984		1.18661	-0.009342		2.22247	-0.004234		2.2514	-0.062874		-1.21251	-0.089181		-1.27771	0.130962		-1.28224	0.075097
	1.1841	-0.030004		1.1873	-0.009194		2.22376	-0.003735		2.25271	-0.062217		-1.21183	-0.088874		-1.27707	0.130751		-1.28159	0.07535
	1.18479	-0.030093		1.18799	-0.009973		2.22505	-0.002614		2.25401	-0.060782		-1.21114	-0.088065		-1.27642	0.130622		-1.28095	0.075376
	1.18548	-0.030342		1.18868	-0.010276		2.22635	-0.000791		2.25532	-0.058926		-1.21046	-0.087691		-1.27578	0.130656		-1.28031	0.075166
	1.18616	-0.030382		1.18937	-0.01004		2.22764	-0.000129		2.25663	-0.058001		-1.20978	-0.086802		-1.27513	0.131285		-1.27967	0.075333
	1.18685	-0.030402		1.19006	-0.010314		2.22893	0.001126		2.25794	-0.057242		-1.20909	-0.086186		-1.27449	0.130909		-1.27903	0.075985
	1.18754	-0.031215		1.19075	-0.010266		2.23022	0.002056		2.25925	-0.056228		-1.20841	-0.085948		-1.27384	0.131952		-1.27838	0.076729
	1.18822	-0.03128		1.19144	-0.009958		2.23151	0.002988		2.26056	-0.055281		-1.20772	-0.086135		-1.27319	0.13256		-1.27774	0.076539
	1.18891	-0.031769		1.19213	-0.009676		2.2328	0.004759		2.26186	-0.054532		-1.20704	-0.085296		-1.27255	0.132817		-1.2771	0.076372
	1.1896	-0.032306		1.19281	-0.009293		2.23409	0.006323		2.26317	-0.054147		-1.20636	-0.08533		-1.2719	0.13254		-1.27645	0.075876
	1.19029	-0.034231		1.1935	-0.009413		2.23538	0.006984		2.26448	-0.052963		-1.20567	-0.084889		-1.27126	0.132574		-1.27581	0.075098
	1.19097	-0.034388		1.19419	-0.010302		2.23667	0.007353		2.26579	-0.051534		-1.20499	-0.084241		-1.27061	0.132217		-1.27517	0.074248
	1.19166	-0.03525		1.19488	-0.010714		2.23796	0.008841		2.26709	-0.050819		-1.2043	-0.083693		-1.26997	0.131628		-1.27453	0.07366
	1.19235	-0.03448		1.19557	-0.010929		2.23926	0.010288		2.2684	-0.050018		-1.20362	-0.083929		-1.26932	0.132314		-1.27388	0.073798
	1.19304	-0.0349		1.19626	-0.010534		2.24055	0.012026		2.26971	-0.049447		-1.20294	-0.084588		-1.26867	0.132468		-1.27324	0.074961
	1.19372	-0.036154		1.19695	-0.010498		2.24184	0.012796		2.27102	-0.048589		-1.20225	-0.084321		-1.26803	0.131951		-1.2726	0.076266
	1.19441	-0.036442		1.19764	-0.011076		2.24313	0.013684		2.27233	-0.047302		-1.20157	-0.084278		-1.26738	0.131589		-1.27196	0.076051
	1.1951	-0.036988		1.19833	-0.011308		2.24442	0.015448		2.27363	-0.046388		-1.20088	-0.084457		-1.26674	0.131859		-1.27132	0.075904
	1.19579	-0.036111		1.19902	-0.011706		2.24571	0.017547		2.27494	-0.046116		-1.2002	-0.083972		-1.26609	0.132128		-1.27067	0.075785
	1.19647	-0.037051		1.19971	-0.011814		2.247	0.019812		2.27625	-0.046916		-1.19952	-0.083124		-1.26544	0.131673		-1.27003	0.075784
	1.19716	-0.036947		1.2004	-0.01174		2.24829	0.0208		2.27756	-0.047108		-1.19883	-0.082783		-1.2648	0.131388		-1.26939	0.075819
	1.19785	-0.037619		1.20109	-0.011381		2.24958	0.02218		2.27887	-0.047451		-1.19815	-0.083198		-1.26415	0.130845		-1.26875	0.076227
	1.19853	-0.037856		1.20178	-0.010998		2.25088	0.02248		2.28017	-0.04694		-1.19747	-0.083175		-1.26351	0.130799		-1.2681	0.076159
	1.19922	-0.038248		1.20247	-0.010535		2.25217	0.022963		2.28148	-0.045994		-1.19678	-0.083625		-1.26286	0.130702		-1.26746	0.076251
	1.19991	-0.037949		1.20315	-0.010996		2.25346	0.023832		2.28279	-0.045886		-1.1961	-0.083684		-1.26222	0.131082		-1.26682	0.076173
	1.2006	-0.038089		1.20385	-0.011593		2.25475	0.024578		2.2841	-0.046163		-1.19541	-0.08348		-1.26157	0.130466		-1.26618	0.076651
	1.20128	-0.038739		1.20453	-0.011327		2.25604	0.025389		2.2854	-0.046256		-1.19473	-0.083554		-1.26092	0.130893		-1.26553	0.077271
	1.20197	-0.038214		1.20522	-0.011097		2.25733	0.025726		2.28671	-0.046723		-1.19405	-0.083528		-1.26028	0.131348		-1.26489	0.077009
	1.20266	-0.038758		1.20591	-0.010932		2.25862	0.025814		2.28802	-0.047365		-1.19336	-0.083137		-1.25963	0.131344		-1.26425	0.076961
	1.20335	-0.039368		1.2066	-0.011555		2.25991	0.026122		2.28933	-0.047097		-1.19268	-0.082858		-1.25899	0.131883		-1.26361	0.078042
	1.20403	-0.039273		1.20729	-0.011448		2.2612	0.025831		2.29064	-0.046587		-1.19199	-0.082887		-1.25834	0.131626		-1.26296	0.078134
	1.20472	-0.039737		1.20798	-0.011135		2.26249	0.025963		2.29194	-0.046377		-1.19131	-0.082096		-1.2577	0.131415		-1.26232	0.078095
	1.20541	-0.039638		1.20867	-0.011724		2.26378	0.025448		2.29325	-0.045759		-1.19063	-0.081922		-1.25705	0.130218		-1.26168	0.078559
	1.20609	-0.038499		1.20936	-0.011279		2.26508	0.02542		2.29456	-0.045399		-1.18994	-0.08271		-1.2564	0.129518		-1.26104	0.078576
	1.20678	-0.038464		1.21005	-0.011646		2.26637	0.024904		2.29587	-0.045767		-1.18926	-0.083136		-1.25576	0.128965		-1.26039	0.078304
	1.20747	-0.038206		1.21074	-0.010985		2.26766	0.025349		2.29718	-0.04604		-1.18858	-0.082948		-1.25511	0.128909		-1.25975	0.077646
	1.20816	-0.037823		1.21143	-0.010866		2.26895	0.025845		2.29848	-0.045769		-1.18789	-0.082912		-1.25447	0.129083		-1.25911	0.077818
	1.20884	-0.037747		1.21212	-0.010512		2.27024	0.025097		2.29979	-0.04584		-1.18721	-0.08264		-1.25382	0.129		-1.25847	0.077739
	1.20953	-0.038448		1.21281	-0.009527		2.27153	0.024358		2.3011	-0.047042		-1.18652	-0.082913		-1.25317	0.128606		-1.25782	0.077472
	1.21022	-0.038912		1.2135	-0.010192		2.27282	0.023952		2.30241	-0.046801		-1.18584	-0.082998		-1.25253	0.128472		-1.25718	0.077317
	1.21091	-0.038834		1.21419	-0.011179		2.27411	0.024613		2.30371	-0.046206		-1.18516	-0.08303		-1.25188	0.127548		-1.25654	0.07685
	1.21159	-0.038993		1.21487	-0.01116		2.2754	0.023999		2.30502	-0.046468		-1.18447	-0.082697		-1.25124	0.126618		-1.2559	0.076789
	1.21228	-0.03921		1.21556	-0.010576		2.2767	0.023507		2.30633	-0.04594		-1.18379	-0.082348		-1.25059	0.126512		-1.25526	0.077587
	1.21297	-0.039316		1.21625	-0.010457		2.27799	0.021805		2.30764	-0.04597		-1.18311	-0.082513		-1.24995	0.126705		-1.25461	0.077273
	1.21365	-0.039776		1.21694	-0.010245		2.27928	0.021545		2.30895	-0.045786		-1.18242	-0.082611		-1.2493	0.126918		-1.25397	0.077068
	1.21434	-0.039471		1.21763	-0.010474		2.28057	0.022658		2.31025	-0.044718		-1.18174	-0.082627		-1.24866	0.126905		-1.25333	0.076467
	1.21503	-0.039358		1.21832	-0.010943		2.28186	0.023325		2.31156	-0.044407		-1.18105	-0.082747		-1.24801	0.125651		-1.25269	0.075437
	1.21572	-0.040149		1.21901	-0.010871		2.28315	0.022986		2.31287	-0.045131		-1.18037	-0.082672		-1.24736	0.124704		-1.25204	0.074796
	1.2164	-0.040456		1.2197	-0.011192		2.28444	0.022208		2.31418	-0.045393		-1.17969	-0.082908		-1.24672	0.125032		-1.2514	0.074644
	1.21709	-0.040601		1.22039	-0.010996		2.28573	0.022542		2.31548	-0.0441		-1.179	-0.083346		-1.24607	0.124448		-1.25076	0.07538
	1.21778	-0.040209		1.22108	-0.011375		2.28702	0.02287		2.31679	-0.043221		-1.17832	-0.083463		-1.24543	0.12417		-1.25012	0.075314
	1.21847	-0.039987		1.22177	-0.011438		2.28831	0.02312		2.3181	-0.042504		-1.17763	-0.083594		-1.24478	0.124088		-1.24947	0.074779
	1.21915	-0.040039		1.22246	-0.011901		2.2896	0.023122		2.31941	-0.041803		-1.17695	-0.08378		-1.24413	0.123687		-1.24883	0.074345
	1.21984	-0.039162		1.22315	-0.012705		2.2909	0.021211		2.32072	-0.0416		-1.17627	-0.084512		-1.24349	0.122815		-1.24819	0.074911
	1.22053	-0.03939		1.22384	-0.012166		2.29219	0.021608		2.32203	-0.041849		-1.17558	-0.085221		-1.24284	0.121779		-1.24754	0.075361
	1.22122	-0.038855		1.22453	-0.011712		2.29348	0.021814		2.32333	-0.042725		-1.1749	-0.085744		-1.2422	0.121246		-1.2469	0.075256
	1.2219	-0.03817		1.22521	-0.012751		2.29477	0.021819		2.32464	-0.0431		-1.17422	-0.085728		-1.24155	0.120789		-1.24626	0.074758
	1.22259	-0.037995		1.22591	-0.013611		2.29606	0.020939		2.32595	-0.044265		-1.17353	-0.085574		-1.24091	0.119805		-1.24562	0.074355
	1.22328	-0.037636		1.22659	-0.014065		2.29735	0.021089		2.32726	-0.043803		-1.17285	-0.085605		-1.24026	0.119116		-1.24498	0.074356
	1.22396	-0.037624		1.22728	-0.013792		2.29864	0.021584		2.32856	-0.043778		-1.17216	-0.08584		-1.23961	0.119228		-1.24433	0.073667
	1.22465	-0.036374		1.22797	-0.013007		2.29993	0.02001		2.32987	-0.043824		-1.17148	-0.086503		-1.23897	0.119455		-1.24369	0.073613
	1.22534	-0.0368		1.22866	-0.012293		2.30123	0.021312		2.33118	-0.044091		-1.1708	-0.087447		-1.23832	0.119159		-1.24305	0.073964
	1.22603	-0.036924		1.22935	-0.011469		2.30252	0.020165		2.33249	-0.044875		-1.17011	-0.088024		-1.23768	0.119554		-1.24241	0.074118
	1.22671	-0.036552		1.23004	-0.011542		2.30381	0.020817		2.3338	-0.045541		-1.16943	-0.087518		-1.23703	0.119485		-1.24176	0.07442
	1.2274	-0.036508		1.23073	-0.012261		2.3051	0.02071		2.3351	-0.046734		-1.16874	-0.086887		-1.23639	0.118637		-1.24112	0.073529
	1.22809	-0.036414		1.23142	-0.012267		2.30639	0.020713		2.33641	-0.047152		-1.16806	-0.087085		-1.23574	0.118574		-1.24048	0.072347
	1.22878	-0.036597		1.23211	-0.013109		2.30768	0.020059		2.33772	-0.047189		-1.16738	-0.087546		-1.23509	0.118388		-1.23984	0.072376
	1.22946	-0.036828		1.2328	-0.013081		2.30897	0.019389		2.33903	-0.047956		-1.16669	-0.087729		-1.23445	0.117758		-1.23919	0.071811
	1.23015	-0.036371		1.23349	-0.012736		2.31026	0.020861		2.34034	-0.048269		-1.16601	-0.088156		-1.2338	0.117115		-1.23855	0.071391
	1.23084	-0.035155		1.23418	-0.014119		2.31155	0.021536		2.34164	-0.047818		-1.16532	-0.089073		-1.23316	0.116657		-1.23791	0.071919
	1.23153	-0.035002		1.23487	-0.014822		2.31284	0.021179		2.34295	-0.048322		-1.16464	-0.089378		-1.23251	0.116443		-1.23727	0.07204
	1.23221	-0.035584		1.23556	-0.015362		2.31413	0.020638		2.34426	-0.049665		-1.16396	-0.090029		-1.23186	0.116644		-1.23662	0.071428
	1.2329	-0.03614		1.23625	-0.015932		2.31542	0.021213		2.34557	-0.049672		-1.16327	-0.090962		-1.23122	0.116437		-1.23598	0.071386
	1.23359	-0.036473		1.23693	-0.016038		2.31672	0.020709		2.34687	-0.049417		-1.16259	-0.091253		-1.23057	0.115409		-1.23534	0.071292
	1.23428	-0.037227		1.23762	-0.016401		2.31801	0.019527		2.34818	-0.049602		-1.16191	-0.092175		-1.22993	0.11465		-1.2347	0.07084
	1.23496	-0.03724		1.23831	-0.015994		2.3193	0.018902		2.34949	-0.049855		-1.16122	-0.092877		-1.22928	0.114147		-1.23405	0.070594
	1.23565	-0.037126		1.239	-0.017381		2.32059	0.018399		2.3508	-0.050246		-1.16054	-0.09311		-1.22864	0.114074		-1.23341	0.070795
	1.23634	-0.038036		1.23969	-0.016862		2.32188	0.018113		2.35211	-0.051074		-1.15985	-0.093589		-1.22799	0.11284		-1.23277	0.070864
	1.23703	-0.038095		1.24038	-0.016635		2.32317	0.019796		2.35341	-0.050919		-1.15917	-0.093581		-1.22734	0.111867		-1.23213	0.070662
	1.23771	-0.03744		1.24107	-0.015702		2.32446	0.020238		2.35472	-0.050916		-1.15849	-0.093303		-1.2267	0.111812		-1.23148	0.070525
	1.2384	-0.036917		1.24176	-0.01592		2.32575	0.019797		2.35603	-0.051705		-1.1578	-0.093195		-1.22605	0.11193		-1.23084	0.070162
	1.23909	-0.036768		1.24245	-0.017385		2.32704	0.018722		2.35734	-0.052828		-1.15712	-0.093906		-1.22541	0.111798		-1.2302	0.069677
	1.23977	-0.036844		1.24314	-0.017711		2.32834	0.0185		2.35865	-0.053565		-1.15644	-0.094279		-1.22476	0.112231		-1.22956	0.070697
	1.24046	-0.03741		1.24383	-0.017596		2.32963	0.017179		2.35995	-0.054439		-1.15575	-0.094714		-1.22412	0.112904		-1.22891	0.071195
	1.24115	-0.036867		1.24452	-0.016985		2.33092	0.016896		2.36126	-0.054766		-1.15507	-0.095231		-1.22347	0.11247		-1.22827	0.071478
	1.24184	-0.036633		1.24521	-0.017358		2.33221	0.017617		2.36257	-0.054215		-1.15438	-0.096201		-1.22282	0.111835		-1.22763	0.071825
	1.24252	-0.03728		1.2459	-0.017963		2.3335	0.017257		2.36388	-0.05377		-1.1537	-0.097469		-1.22218	0.111847		-1.22699	0.071997
	1.24321	-0.037241		1.24659	-0.0188		2.33479	0.018061		2.36518	-0.053032		-1.15302	-0.097847		-1.22153	0.111829		-1.22635	0.07179
	1.2439	-0.036347		1.24728	-0.019788		2.33608	0.017745		2.36649	-0.052433		-1.15233	-0.097457		-1.22089	0.111874		-1.2257	0.071075
	1.24459	-0.035791		1.24796	-0.019664		2.33737	0.017706		2.3678	-0.052964		-1.15165	-0.097173		-1.22024	0.111898		-1.22506	0.071139
	1.24527	-0.036399		1.24866	-0.019251		2.33866	0.017474		2.36911	-0.054342		-1.15096	-0.097643		-1.2196	0.11187		-1.22442	0.070663
	1.24596	-0.036655		1.24934	-0.01968		2.33995	0.01731		2.37042	-0.054734		-1.15028	-0.097214		-1.21895	0.112277		-1.22378	0.070216
	1.24665	-0.036195		1.25003	-0.020183		2.34125	0.017047		2.37172	-0.054762		-1.1496	-0.096308		-1.2183	0.112306		-1.22313	0.069923
	1.24734	-0.035827		1.25072	-0.020153		2.34254	0.015845		2.37303	-0.05505		-1.14891	-0.096488		-1.21766	0.111655		-1.22249	0.070261
	1.24802	-0.035162		1.25141	-0.020479		2.34383	0.014393		2.37434	-0.055608		-1.14823	-0.096532		-1.21701	0.111072		-1.22185	0.069887
	1.24871	-0.034602		1.2521	-0.021279		2.34512	0.012969		2.37565	-0.055978		-1.14755	-0.096807		-1.21637	0.111085		-1.22121	0.069346
	1.2494	-0.03432		1.25279	-0.021461		2.34641	0.011467		2.37696	-0.055125		-1.14686	-0.09664		-1.21572	0.112441		-1.22056	0.069454
	1.25008	-0.033815		1.25348	-0.021544		2.3477	0.010754		2.37826	-0.054601		-1.14618	-0.096432		-1.21507	0.113559		-1.21992	0.069279
	1.25077	-0.033566		1.25417	-0.021594		2.34899	0.011487		2.37957	-0.055488		-1.14549	-0.095911		-1.21443	0.113422		-1.21928	0.070029
	1.25146	-0.034336		1.25486	-0.021305		2.35028	0.012086		2.38088	-0.056307		-1.14481	-0.095748		-1.21378	0.11273		-1.21864	0.069492
	1.25215	-0.035416		1.25555	-0.021099		2.35157	0.011884		2.38219	-0.056429		-1.14413	-0.095537		-1.21314	0.112531		-1.21799	0.069485
	1.25283	-0.036094		1.25624	-0.020698		2.35286	0.012033		2.38349	-0.056044		-1.14344	-0.09573		-1.21249	0.112704		-1.21735	0.069945
	1.25352	-0.036855		1.25693	-0.020467		2.35416	0.011573		2.3848	-0.055709		-1.14276	-0.095443		-1.21185	0.112942		-1.21671	0.070048
	1.25421	-0.037293		1.25762	-0.020798		2.35545	0.010482		2.38611	-0.056681		-1.14207	-0.095664		-1.2112	0.11323		-1.21607	0.070487
	1.2549	-0.037955		1.25831	-0.020974		2.35674	0.0091		2.38742	-0.058281		-1.14139	-0.095859		-1.21056	0.113233		-1.21542	0.070322
	1.25558	-0.03829		1.259	-0.02076		2.35803	0.008597		2.38873	-0.05868		-1.14071	-0.095814		-1.20991	0.112766		-1.21478	0.070108
	1.25627	-0.038232		1.25968	-0.019838		2.35932	0.008803		2.39003	-0.057768		-1.14002	-0.096313		-1.20926	0.112656		-1.21414	0.070562
	1.25696	-0.038099		1.26037	-0.019819		2.36061	0.008698		2.39134	-0.056969		-1.13934	-0.097059		-1.20862	0.113009		-1.2135	0.071267
	1.25764	-0.037278		1.26106	-0.020139		2.3619	0.008416		2.39265	-0.056369		-1.13865	-0.09755		-1.20797	0.113154		-1.21285	0.07078
	1.25833	-0.036716		1.26175	-0.020588		2.36319	0.007726		2.39396	-0.056191		-1.13797	-0.098165		-1.20733	0.113064		-1.21221	0.070721
	1.25902	-0.036394		1.26244	-0.021046		2.36448	0.007097		2.39527	-0.056588		-1.13729	-0.098542		-1.20668	0.112591		-1.21157	0.071247
	1.25971	-0.035361		1.26313	-0.020976		2.36577	0.006137		2.39657	-0.057143		-1.1366	-0.098768		-1.20603	0.11207		-1.21093	0.071603
	1.26039	-0.034765		1.26382	-0.021236		2.36707	0.005695		2.39788	-0.058356		-1.13592	-0.098284		-1.20539	0.111293		-1.21028	0.07117
	1.26108	-0.034388		1.26451	-0.021094		2.36836	0.005829		2.39919	-0.058528		-1.13524	-0.09865		-1.20474	0.110845		-1.20964	0.070483
	1.26177	-0.033912		1.2652	-0.020754		2.36965	0.005391		2.4005	-0.058528		-1.13455	-0.098284		-1.2041	0.111429		-1.209	0.070666
	1.26246	-0.033513		1.26589	-0.019943		2.37094	0.006315		2.4018	-0.057902		-1.13387	-0.098391		-1.20345	0.111621		-1.20836	0.070985
	1.26314	-0.032646		1.26658	-0.01927		2.37223	0.006028		2.40311	-0.057068		-1.13319	-0.09857		-1.20281	0.111364		-1.20772	0.070849
	1.26383	-0.032183		1.26727	-0.019586		2.37352	0.00611		2.40442	-0.057278		-1.1325	-0.099329		-1.20216	0.111122		-1.20707	0.07131
	1.26452	-0.032547		1.26796	-0.019245		2.37481	0.006999		2.40573	-0.057518		-1.13182	-0.09979		-1.20151	0.110212		-1.20643	0.071908
	1.2652	-0.033345		1.26865	-0.018547		2.3761	0.008173		2.40704	-0.058193		-1.13113	-0.099552		-1.20087	0.109468		-1.20579	0.071805
	1.26589	-0.033791		1.26934	-0.018479		2.37739	0.009004		2.40834	-0.058097		-1.13045	-0.098945		-1.20022	0.109306		-1.20514	0.071187
	1.26658	-0.033351		1.27002	-0.019186		2.37868	0.009247		2.40965	-0.057909		-1.12976	-0.09815		-1.19958	0.10887		-1.2045	0.071338
	1.26727	-0.034044		1.27072	-0.019277		2.37997	0.009659		2.41096	-0.057817		-1.12908	-0.097599		-1.19893	0.109165		-1.20386	0.071397
	1.26795	-0.033223		1.2714	-0.019463		2.38127	0.008392		2.41227	-0.056811		-1.1284	-0.097361		-1.19829	0.109478		-1.20322	0.070442
	1.26864	-0.031373		1.27209	-0.018683		2.38256	0.008683		2.41358	-0.056597		-1.12771	-0.097002		-1.19764	0.109209		-1.20257	0.070998
	1.26933	-0.031441		1.27278	-0.019271		2.38385	0.008603		2.41488	-0.057128		-1.12703	-0.096706		-1.19699	0.109222		-1.20193	0.071478
	1.27002	-0.030114		1.27347	-0.018157		2.38514	0.007779		2.41619	-0.058151		-1.12635	-0.097178		-1.19635	0.109156		-1.20129	0.071156
	1.2707	-0.029115		1.27416	-0.018524		2.38643	0.007493		2.4175	-0.058361		-1.12566	-0.096944		-1.1957	0.109218		-1.20065	0.071116
	1.27139	-0.028969		1.27485	-0.018936		2.38772	0.008493		2.41881	-0.056639		-1.12498	-0.096261		-1.19506	0.10899		-1.2	0.071818
	1.27208	-0.028775		1.27554	-0.019088		2.38901	0.009506		2.42012	-0.05548		-1.1243	-0.096441		-1.19441	0.107992		-1.19936	0.071896
	1.27277	-0.029334		1.27623	-0.019506		2.3903	0.010459		2.42142	-0.054906		-1.12361	-0.096211		-1.19376	0.107358		-1.19872	0.071714
	1.27345	-0.028685		1.27692	-0.019687		2.3916	0.012183		2.42273	-0.055678		-1.12293	-0.096248		-1.19312	0.107291		-1.19808	0.072526
	1.27414	-0.028522		1.27761	-0.01891		2.39289	0.011953		2.42404	-0.056382		-1.12224	-0.095865		-1.19247	0.106259		-1.19744	0.071791
	1.27483	-0.029415		1.2783	-0.018204		2.39418	0.012559		2.42535	-0.056475		-1.12156	-0.096263		-1.19183	0.105535		-1.19679	0.071637
	1.27552	-0.029745		1.27899	-0.0189		2.39547	0.012507		2.42665	-0.056812		-1.12088	-0.09618		-1.19118	0.105904		-1.19615	0.070889
	1.2762	-0.030067		1.27968	-0.019146		2.39676	0.012076		2.42796	-0.057384		-1.12019	-0.096257		-1.19054	0.106283		-1.19551	0.071044
	1.27689	-0.029714		1.28037	-0.018827		2.39805	0.013018		2.42927	-0.058522		-1.11951	-0.095774		-1.18989	0.106357		-1.19487	0.070094
	1.27758	-0.029616		1.28106	-0.018994		2.39934	0.013051		2.43058	-0.058245		-1.11882	-0.095545		-1.18925	0.106508		-1.19422	0.069292
	1.27826	-0.030447		1.28174	-0.019091		2.40063	0.013281		2.43189	-0.057972		-1.11814	-0.095933		-1.1886	0.106022		-1.19358	0.069351
	1.27895	-0.03117		1.28243	-0.019135		2.40192	0.013222		2.43319	-0.057322		-1.11746	-0.095774		-1.18795	0.10562		-1.19294	0.068761
	1.27964	-0.031238		1.28312	-0.019035		2.40321	0.013031		2.4345	-0.056896		-1.11677	-0.095998		-1.18731	0.104097		-1.1923	0.069096
	1.28033	-0.031197		1.28381	-0.017837		2.4045	0.013357		2.43581	-0.057635		-1.11609	-0.09551		-1.18666	0.103865		-1.19165	0.069483
	1.28101	-0.031634		1.2845	-0.017822		2.4058	0.013901		2.43712	-0.057763		-1.1154	-0.096716		-1.18602	0.103192		-1.19101	0.068999
	1.2817	-0.032291		1.28519	-0.018706		2.40709	0.014109		2.43843	-0.058473		-1.11472	-0.097402		-1.18537	0.102521		-1.19037	0.068906
	1.28239	-0.033247		1.28588	-0.018554		2.40838	0.013087		2.43973	-0.058476		-1.11404	-0.097507		-1.18473	0.102225		-1.18973	0.070088
	1.28308	-0.033675		1.28657	-0.017025		2.40967	0.013046		2.44104	-0.058444		-1.11335	-0.096972		-1.18408	0.102206		-1.18908	0.070161
	1.28376	-0.03437		1.28726	-0.017119		2.41096	0.01374		2.44235	-0.058529		-1.11267	-0.096857		-1.18343	0.100357		-1.18844	0.07091
	1.28445	-0.03492		1.28795	-0.017821		2.41225	0.01246		2.44366	-0.059483		-1.11199	-0.096818		-1.18279	0.099396		-1.1878	0.070889
	1.28514	-0.035385		1.28864	-0.017135		2.41354	0.013108		2.44496	-0.060254		-1.1113	-0.097245		-1.18214	0.099059		-1.18716	0.069502
	1.28582	-0.035212		1.28933	-0.017873		2.41483	0.013856		2.44627	-0.060302		-1.11062	-0.097701		-1.1815	0.099053		-1.18651	0.069898
	1.28651	-0.034066		1.29002	-0.018328		2.41612	0.012778		2.44758	-0.059766		-1.10993	-0.098512		-1.18085	0.098579		-1.18587	0.069472
	1.2872	-0.033722		1.29071	-0.017926		2.41742	0.011988		2.44889	-0.059277		-1.10925	-0.098753		-1.1802	0.097755		-1.18523	0.069994
	1.28789	-0.034474		1.2914	-0.01733		2.41871	0.011866		2.4502	-0.060376		-1.10857	-0.099226		-1.17956	0.097855		-1.18459	0.070622
	1.28858	-0.034988		1.29209	-0.017144		2.42	0.010782		2.4515	-0.062177		-1.10788	-0.099081		-1.17891	0.097719		-1.18395	0.070766
	1.28926	-0.034225		1.29278	-0.017694		2.42129	0.009652		2.45281	-0.062545		-1.1072	-0.09875		-1.17827	0.097089		-1.1833	0.070493
	1.28995	-0.033719		1.29346	-0.018004		2.42258	0.008525		2.45412	-0.062614		-1.10651	-0.099219		-1.17762	0.096255		-1.18266	0.071011
	1.29064	-0.034254		1.29415	-0.018375		2.42387	0.005168		2.45543	-0.062806		-1.10583	-0.09934		-1.17698	0.096502		-1.18202	0.070693
	1.29132	-0.033999		1.29484	-0.018		2.42516	0.00494		2.45674	-0.062786		-1.10515	-0.099214		-1.17633	0.095723		-1.18138	0.070513
	1.29201	-0.034468		1.29553	-0.017076		2.42645	0.004303		2.45804	-0.063966		-1.10446	-0.100162		-1.17568	0.095009		-1.18073	0.070806
	1.2927	-0.035606		1.29622	-0.016655		2.42774	0.005208		2.45935	-0.064526		-1.10378	-0.100096		-1.17504	0.094157		-1.18009	0.070929
	1.29339	-0.035788		1.29691	-0.01668		2.42903	0.005872		2.46066	-0.065068		-1.1031	-0.099229		-1.17439	0.092505		-1.17945	0.07054
	1.29407	-0.036135		1.2976	-0.017541		2.43032	0.006198		2.46197	-0.065476		-1.10241	-0.098706		-1.17375	0.093141		-1.17881	0.069498
	1.29476	-0.036601		1.29829	-0.017998		2.43162	0.005725		2.46327	-0.065193		-1.10173	-0.098667		-1.1731	0.091898		-1.17816	0.070205
	1.29545	-0.037449		1.29898	-0.018282		2.43291	0.005618		2.46458	-0.065374		-1.10104	-0.099292		-1.17246	0.091413		-1.17752	0.0697
	1.29614	-0.037779		1.29967	-0.01821		2.4342	0.005366		2.46589	-0.065552		-1.10036	-0.09939		-1.17181	0.091004		-1.17688	0.070019
	1.29682	-0.038583		1.30036	-0.018736		2.43549	0.005748		2.4672	-0.066455		-1.09968	-0.099617		-1.17116	0.090365		-1.17623	0.06972
	1.29751	-0.03936		1.30105	-0.019023		2.43678	0.006113		2.46851	-0.067314		-1.09899	-0.099556		-1.17052	0.090192		-1.17559	0.068473
	1.2982	-0.03912		1.30174	-0.018765		2.43807	0.005108		2.46981	-0.067917		-1.09831	-0.098876		-1.16987	0.090141		-1.17495	0.068628
	1.29889	-0.038815		1.30243	-0.018659		2.43936	0.004986		2.47112	-0.067383		-1.09763	-0.097669		-1.16923	0.090257		-1.17431	0.068013
	1.29957	-0.038522		1.30312	-0.018936		2.44065	0.005443		2.47243	-0.067365		-1.09694	-0.09722		-1.16858	0.090771		-1.17367	0.068083
	1.30026	-0.038757		1.30381	-0.018919		2.44194	0.00511		2.47374	-0.068318		-1.09626	-0.097477		-1.16793	0.090782		-1.17302	0.067924
	1.30095	-0.038758		1.30449	-0.018579		2.44324	0.005342		2.47505	-0.069537		-1.09557	-0.097938		-1.16729	0.090347		-1.17238	0.06763
	1.30163	-0.038852		1.30518	-0.018726		2.44453	0.005574		2.47635	-0.069931		-1.09489	-0.098338		-1.16664	0.0895		-1.17174	0.067009
	1.30232	-0.040073		1.30587	-0.019021		2.44582	0.004195		2.47766	-0.070099		-1.09421	-0.098527		-1.166	0.088532		-1.1711	0.066484
	1.30301	-0.040175		1.30656	-0.019131		2.44711	0.003035		2.47897	-0.071566		-1.09352	-0.098631		-1.16535	0.088546		-1.17045	0.065976
	1.3037	-0.040551		1.30725	-0.019394		2.4484	0.004306		2.48028	-0.071819		-1.09284	-0.098573		-1.16471	0.088113		-1.16981	0.065308
	1.30438	-0.041257		1.30794	-0.019091		2.44969	0.004864		2.48159	-0.071586		-1.09215	-0.098288		-1.16406	0.08718		-1.16917	0.064685
	1.30507	-0.04082		1.30863	-0.018404		2.45098	0.005089		2.48289	-0.070763		-1.09147	-0.098635		-1.16341	0.086976		-1.16853	0.064228
	1.30576	-0.040366		1.30932	-0.018536		2.45227	0.006999		2.4842	-0.070492		-1.09079	-0.099497		-1.16277	0.08661		-1.16788	0.06335
	1.30645	-0.040674		1.31001	-0.018635		2.45356	0.008231		2.48551	-0.071214		-1.0901	-0.100643		-1.16212	0.087523		-1.16724	0.062507
	1.30713	-0.040945		1.3107	-0.017257		2.45485	0.009393		2.48682	-0.070793		-1.08942	-0.101311		-1.16148	0.087793		-1.1666	0.062158
	1.30782	-0.041544		1.31139	-0.017198		2.45614	0.010361		2.48813	-0.071146		-1.08874	-0.101713		-1.16083	0.086648		-1.16596	0.061831
	1.30851	-0.040928		1.31208	-0.017135		2.45744	0.010418		2.48943	-0.07043		-1.08805	-0.102074		-1.16019	0.086618		-1.16531	0.061553
	1.3092	-0.040612		1.31277	-0.016101		2.45873	0.01016		2.49074	-0.069923		-1.08737	-0.102461		-1.15954	0.086536		-1.16467	0.061048
	1.30988	-0.040924		1.31346	-0.015548		2.46002	0.008669		2.49205	-0.070749		-1.08668	-0.102599		-1.15889	0.084942		-1.16403	0.060808
	1.31057	-0.041413		1.31415	-0.015232		2.46131	0.007427		2.49336	-0.069927		-1.086	-0.102813		-1.15825	0.084766		-1.16339	0.060127
	1.31126	-0.04193		1.31483	-0.01529		2.4626	0.007234		2.49466	-0.068984		-1.08532	-0.102753		-1.1576	0.084251		-1.16274	0.060094
	1.31194	-0.041196		1.31553	-0.015341		2.46389	0.007705		2.49597	-0.068556		-1.08463	-0.103023		-1.15696	0.084643		-1.1621	0.06072
	1.31263	-0.040468		1.31621	-0.0151		2.46518	0.007651		2.49728	-0.068365		-1.08395	-0.103528		-1.15631	0.084993		-1.16146	0.061123
	1.31332	-0.040016		1.3169	-0.016182		2.46647	0.007516		2.49859	-0.068735		-1.08326	-0.103936		-1.15566	0.08467		-1.16082	0.061255
	1.31401	-0.039382		1.31759	-0.018225		2.46776	0.006967		2.4999	-0.068493		-1.08258	-0.10425		-1.15502	0.085119		-1.16017	0.061195
	1.31469	-0.039177		1.31828	-0.01833		2.46905	0.006501		2.5012	-0.067725		-1.0819	-0.104161		-1.15437	0.085456		-1.15953	0.061452
	1.31538	-0.039019		1.31897	-0.017436		2.47035	0.005964		2.50251	-0.066513		-1.08121	-0.104083		-1.15373	0.0851		-1.15889	0.0616
	1.31607	-0.038243		1.31966	-0.018447		2.47164	0.00561		2.50382	-0.066725		-1.08053	-0.103387		-1.15308	0.084681		-1.15825	0.061387
	1.31676	-0.037968		1.32035	-0.01813		2.47293	0.005571		2.50513	-0.067065		-1.07984	-0.103185		-1.15244	0.085008		-1.1576	0.060689
	1.31744	-0.03833		1.32104	-0.016444		2.47422	0.005051		2.50644	-0.067212		-1.07916	-0.103314		-1.15179	0.084617		-1.15696	0.060006
	1.31813	-0.037891		1.32173	-0.017176		2.47551	0.005354		2.50774	-0.067		-1.07848	-0.103056		-1.15115	0.085321		-1.15632	0.059987
	1.31882	-0.037974		1.32242	-0.017124		2.4768	0.005956		2.50905	-0.067438		-1.07779	-0.102882		-1.1505	0.084369		-1.15568	0.060453
	1.3195	-0.038782		1.32311	-0.016341		2.47809	0.00635		2.51036	-0.067706		-1.07711	-0.103099		-1.14985	0.084269		-1.15504	0.060877
	1.32019	-0.038827		1.3238	-0.015894		2.47938	0.006421		2.51167	-0.066929		-1.07643	-0.102726		-1.14921	0.08338		-1.15439	0.060902
	1.32088	-0.038775		1.32449	-0.016672		2.48067	0.00552		2.51297	-0.067859		-1.07574	-0.102575		-1.14856	0.083408		-1.15375	0.061059
	1.32157	-0.037854		1.32518	-0.017436		2.48197	0.005765		2.51428	-0.06896		-1.07506	-0.102266		-1.14792	0.083751		-1.15311	0.061645
	1.32225	-0.036711		1.32587	-0.017531		2.48326	0.005502		2.51559	-0.069079		-1.07437	-0.102262		-1.14727	0.083401		-1.15247	0.061987
	1.32294	-0.036082		1.32655	-0.017932		2.48455	0.004867		2.5169	-0.069713		-1.07369	-0.102164		-1.14663	0.0824		-1.15182	0.062026
	1.32363	-0.036637		1.32724	-0.017764		2.48584	0.004989		2.51821	-0.069212		-1.07301	-0.102097		-1.14598	0.083026		-1.15118	0.062087
	1.32432	-0.036784		1.32793	-0.018152		2.48713	0.004407		2.51951	-0.069113		-1.07232	-0.102372		-1.14533	0.083906		-1.15054	0.061729
	1.325	-0.036032		1.32862	-0.018655		2.48842	0.004734		2.52082	-0.069033		-1.07164	-0.102953		-1.14469	0.082226		-1.1499	0.061441
	1.32569	-0.035863		1.32931	-0.019663		2.48971	0.004632		2.52213	-0.069204		-1.07096	-0.102194		-1.14404	0.081673		-1.14925	0.061747
	1.32638	-0.035076		1.33	-0.020063		2.491	0.005458		2.52344	-0.068587		-1.07027	-0.101214		-1.1434	0.081138		-1.14861	0.061957
	1.32706	-0.034573		1.33069	-0.020875		2.49229	0.006321		2.52474	-0.067602		-1.06959	-0.101217		-1.14275	0.080826		-1.14797	0.061883
	1.32775	-0.034916		1.33138	-0.020196		2.49358	0.007185		2.52605	-0.0678		-1.0689	-0.101609		-1.1421	0.080686		-1.14733	0.061982
	1.32844	-0.035778		1.33207	-0.021077		2.49487	0.006423		2.52736	-0.068246		-1.06822	-0.101919		-1.14146	0.080251		-1.14668	0.062694
	1.32913	-0.036182		1.33276	-0.020681		2.49617	0.006044		2.52867	-0.068263		-1.06754	-0.102065		-1.14081	0.081298		-1.14604	0.063087
	1.32981	-0.03603		1.33345	-0.021922		2.49746	0.0062		2.52998	-0.068611		-1.06685	-0.101994		-1.14017	0.08181		-1.1454	0.06341
	1.3305	-0.03533		1.33414	-0.021941		2.49875	0.006354		2.53128	-0.068932		-1.06617	-0.10189		-1.13952	0.081411		-1.14476	0.063737
	1.33119	-0.034169		1.33483	-0.022187		2.50004	0.006184		2.53259	-0.070135		-1.06548	-0.101918		-1.13888	0.080371		-1.14411	0.064102
	1.33188	-0.033339		1.33552	-0.02305		2.50133	0.006109		2.5339	-0.071495		-1.0648	-0.101919		-1.13823	0.080675		-1.14347	0.064718
	1.33256	-0.033145		1.33621	-0.023543		2.50262	0.005571		2.53521	-0.072958		-1.06412	-0.102515		-1.13758	0.079913		-1.14283	0.064566
	1.33325	-0.032705		1.33689	-0.023307		2.50391	0.005473		2.53652	-0.073487		-1.06343	-0.103072		-1.13694	0.079687		-1.14219	0.064488
	1.33394	-0.032762		1.33759	-0.022334		2.5052	0.005774		2.53782	-0.072499		-1.06275	-0.103279		-1.13629	0.08003		-1.14154	0.06435
	1.33463	-0.032363		1.33827	-0.022333		2.5065	0.007184		2.53913	-0.071473		-1.06207	-0.103215		-1.13565	0.080881		-1.1409	0.064325
	1.33531	-0.032092		1.33896	-0.02217		2.50779	0.006671		2.54044	-0.071155		-1.06138	-0.103021		-1.135	0.081676		-1.14026	0.064522
	1.336	-0.032352		1.33965	-0.021835		2.50908	0.006451		2.54175	-0.070438		-1.0607	-0.10236		-1.13436	0.082107		-1.13962	0.064985
	1.33669	-0.032088		1.34034	-0.022853		2.51037	0.006796		2.54306	-0.071563		-1.06001	-0.101969		-1.13371	0.082283		-1.13897	0.065465
	1.33738	-0.032778		1.34103	-0.023475		2.51166	0.007697		2.54436	-0.07097		-1.05933	-0.101594		-1.13306	0.082816		-1.13833	0.065753
	1.33806	-0.033376		1.34172	-0.023592		2.51295	0.008309		2.54567	-0.070683		-1.05865	-0.101534		-1.13242	0.083351		-1.13769	0.066626
	1.33875	-0.034083		1.34241	-0.025171		2.51424	0.008579		2.54698	-0.070079		-1.05796	-0.101576		-1.13177	0.083558		-1.13705	0.067133
	1.33944	-0.034475		1.3431	-0.025045		2.51553	0.00814		2.54829	-0.070832		-1.05728	-0.100723		-1.13113	0.083756		-1.13641	0.067284
	1.34013	-0.03471		1.34379	-0.024328		2.51682	0.007729		2.5496	-0.07087		-1.05659	-0.099822		-1.13048	0.084139		-1.13576	0.0676
	1.34081	-0.034236		1.34448	-0.02431		2.51811	0.006141		2.5509	-0.071279		-1.05591	-0.09906		-1.12983	0.083565		-1.13512	0.067492
	1.3415	-0.034536		1.34517	-0.025583		2.5194	0.006267		2.55221	-0.07158		-1.05523	-0.098964		-1.12919	0.08273		-1.13448	0.067889
	1.34219	-0.034266		1.34586	-0.025217		2.5207	0.007153		2.55352	-0.072818		-1.05454	-0.098391		-1.12854	0.082366		-1.13383	0.068567
	1.34287	-0.034012		1.34655	-0.026278		2.52199	0.007623		2.55483	-0.073036		-1.05386	-0.098488		-1.1279	0.082007		-1.13319	0.06863
	1.34356	-0.033931		1.34724	-0.02717		2.52328	0.007104		2.55613	-0.073378		-1.05317	-0.098002		-1.12725	0.0817		-1.13255	0.069021
	1.34425	-0.034054		1.34793	-0.026931		2.52457	0.006771		2.55744	-0.073875		-1.05249	-0.097787		-1.12661	0.082033		-1.13191	0.06942
	1.34494	-0.034293		1.34861	-0.02702		2.52586	0.006422		2.55875	-0.074064		-1.05181	-0.097861		-1.12596	0.081973		-1.13126	0.070663
	1.34562	-0.033878		1.3493	-0.027033		2.52715	0.00714		2.56006	-0.074475		-1.05112	-0.098268		-1.12532	0.081695		-1.13062	0.071031
	1.34631	-0.03414		1.34999	-0.026948		2.52844	0.007012		2.56137	-0.07575		-1.05044	-0.098302		-1.12467	0.080974		-1.12998	0.071359
	1.347	-0.035334		1.35068	-0.027137		2.52973	0.005551		2.56267	-0.07695		-1.04976	-0.097902		-1.12402	0.080145		-1.12934	0.071212
	1.34769	-0.034931		1.35137	-0.027105		2.53102	0.005216		2.56398	-0.077179		-1.04907	-0.097905		-1.12338	0.08041		-1.1287	0.070945
	1.34837	-0.033885		1.35206	-0.027004		2.53231	0.004882		2.56529	-0.07593		-1.04839	-0.097246		-1.12273	0.080794		-1.12805	0.071024
	1.34906	-0.033606		1.35275	-0.026435		2.53361	0.00425		2.5666	-0.074643		-1.0477	-0.097067		-1.12209	0.080123		-1.12741	0.070529
	1.34975	-0.033943		1.35344	-0.026812		2.5349	0.004413		2.56791	-0.075218		-1.04702	-0.096506		-1.12144	0.080266		-1.12677	0.070643
	1.35044	-0.034171		1.35413	-0.027113		2.53619	0.004839		2.56921	-0.075549		-1.04634	-0.096555		-1.12079	0.080737		-1.12613	0.071489
	1.35112	-0.034041		1.35482	-0.027387		2.53748	0.005021		2.57052	-0.076595		-1.04565	-0.097685		-1.12015	0.081042		-1.12548	0.071857
	1.35181	-0.033017		1.35551	-0.028681		2.53877	0.00347		2.57183	-0.078205		-1.04497	-0.097725		-1.1195	0.081093		-1.12484	0.07218
	1.3525	-0.033387		1.3562	-0.028042		2.54006	0.003098		2.57314	-0.079212		-1.04428	-0.098376		-1.11886	0.080965		-1.1242	0.072088
	1.35318	-0.032908		1.35689	-0.028219		2.54135	0.003897		2.57444	-0.079907		-1.0436	-0.098763		-1.11821	0.081146		-1.12356	0.071631
	1.35387	-0.031762		1.35758	-0.028808		2.54264	0.005147		2.57575	-0.07929		-1.04292	-0.098221		-1.11757	0.081135		-1.12291	0.071731
	1.35456	-0.031992		1.35827	-0.029277		2.54393	0.004605		2.57706	-0.079207		-1.04223	-0.097916		-1.11692	0.08153		-1.12227	0.071888
	1.35525	-0.031952		1.35896	-0.029344		2.54522	0.003265		2.57837	-0.079601		-1.04155	-0.097619		-1.11627	0.081216		-1.12163	0.072149
	1.35593	-0.032957		1.35964	-0.029629		2.54651	0.001848		2.57968	-0.080461		-1.04087	-0.097899		-1.11563	0.080999		-1.12099	0.071875
	1.35662	-0.033952		1.36034	-0.030033		2.54781	0.002371		2.58098	-0.081772		-1.04018	-0.097875		-1.11498	0.080675		-1.12034	0.071207
	1.35731	-0.035443		1.36102	-0.029978		2.5491	0.001624		2.58229	-0.082302		-1.0395	-0.098037		-1.11434	0.080652		-1.1197	0.070389
	1.358	-0.035123		1.36171	-0.030436		2.55039	0.00262		2.5836	-0.083017		-1.03882	-0.097592		-1.11369	0.080811		-1.11906	0.069342
	1.35868	-0.034435		1.3624	-0.030127		2.55168	0.001181		2.58491	-0.083583		-1.03813	-0.09716		-1.11305	0.080551		-1.11842	0.068753
	1.35937	-0.035442		1.36309	-0.029372		2.55297	5.7e-05		2.58622	-0.082623		-1.03745	-0.096765		-1.1124	0.081193		-1.11777	0.068427
	1.36006	-0.035207		1.36378	-0.029042		2.55426	-0.00088		2.58752	-0.083748		-1.03676	-0.097064		-1.11175	0.082106		-1.11713	0.067881
	1.36075	-0.034938		1.36447	-0.028458		2.55555	-0.000256		2.58883	-0.085948		-1.03608	-0.097068		-1.11111	0.0823		-1.11649	0.067464
	1.36143	-0.03516		1.36516	-0.02796		2.55684	-8.5e-05		2.59014	-0.087842		-1.0354	-0.097653		-1.11046	0.082474		-1.11585	0.067122
	1.36212	-0.035343		1.36585	-0.02803		2.55813	-0.001262		2.59145	-0.089133		-1.03471	-0.097889		-1.10982	0.082761		-1.1152	0.06714
	1.36281	-0.034163		1.36654	-0.027639		2.55943	-0.00221		2.59275	-0.088476		-1.03403	-0.098351		-1.10917	0.082427		-1.11456	0.066383
	1.36349	-0.034476		1.36723	-0.027063		2.56072	-0.002009		2.59406	-0.087199		-1.03334	-0.098259		-1.10852	0.081521		-1.11392	0.065728
	1.36418	-0.035032		1.36792	-0.026478		2.56201	-0.001982		2.59537	-0.086541		-1.03266	-0.097951		-1.10788	0.080776		-1.11328	0.06506
	1.36487	-0.035354		1.36861	-0.026157		2.5633	-0.002353		2.59668	-0.087852		-1.03198	-0.098237		-1.10723	0.080041		-1.11264	0.064753
	1.36556	-0.035921		1.3693	-0.025458		2.56459	-0.00299		2.59799	-0.089082		-1.03129	-0.097926		-1.10659	0.079892		-1.11199	0.064588
	1.36624	-0.037074		1.36999	-0.024781		2.56588	-0.002402		2.59929	-0.088765		-1.03061	-0.097825		-1.10594	0.079612		-1.11135	0.064998
	1.36693	-0.037722		1.37068	-0.024721		2.56717	-0.0023		2.6006	-0.087793		-1.02992	-0.098185		-1.1053	0.079515		-1.11071	0.065782
	1.36762	-0.038614		1.37136	-0.024791		2.56846	-0.003073		2.60191	-0.087057		-1.02924	-0.098788		-1.10465	0.079541		-1.11007	0.066136
	1.36831	-0.039156		1.37205	-0.025069		2.56975	-0.003067		2.60322	-0.085905		-1.02856	-0.098525		-1.104	0.079255		-1.10942	0.066355
	1.36899	-0.03949		1.37274	-0.025063		2.57104	-0.003092		2.60453	-0.085085		-1.02787	-0.098671		-1.10336	0.078306		-1.10878	0.066616
	1.36968	-0.039955		1.37343	-0.025889		2.57233	-0.002938		2.60583	-0.084975		-1.02719	-0.099318		-1.10271	0.076975		-1.10814	0.067208
	1.37037	-0.040009		1.37412	-0.026273		2.57363	-0.004231		2.60714	-0.084758		-1.02651	-0.100654		-1.10207	0.076581		-1.10749	0.068003
	1.37105	-0.039983		1.37481	-0.025841		2.57492	-0.005526		2.60845	-0.08532		-1.02582	-0.100845		-1.10142	0.076584		-1.10685	0.067817
	1.37174	-0.040228		1.3755	-0.025761		2.57621	-0.00528		2.60976	-0.086713		-1.02514	-0.101275		-1.10078	0.076323		-1.10621	0.067871
	1.37243	-0.040034		1.37619	-0.025732		2.5775	-0.003098		2.61106	-0.087339		-1.02445	-0.101044		-1.10013	0.076137		-1.10557	0.067726
	1.37312	-0.03988		1.37688	-0.02515		2.57879	-0.001936		2.61237	-0.086122		-1.02377	-0.101324		-1.09948	0.076541		-1.10492	0.066595
[truncated: 47,374 more rows]

## Sheet: ELLA
	NA concentration
	ng/mL	µg/mL		msN1			N1/09			N1/09 hybrid			N1/19 hybrid			PR8 N1			PR8 N1 hybrid			mS hybrid
	0	0		0.055	0.053		0.07	0.069		0.046	0.046		0.052	0.052		0.06	0.056		0.048	0.052		0.047	0.047
	14	0.013717		0.887	0.87		0.348	0.357		0.735	0.55		0.069	0.073		0.506	0.57		0.195	0.124		0.055	0.052
	41	0.041152		1.016	1.054		0.633	0.591		0.874	0.679		0.121	0.13		0.906	0.808		0.441	0.203		0.106	0.063
	123	0.123457		1.071	1.078		0.789	0.746		1.035	1.014		0.363	0.247		1.118	1.228		0.843	0.734		0.119	0.102
	370	0.37037		1.248	1.212		0.927	0.907		1.33	1.175		0.678	0.593		1.473	1.431		1.111	1.021		0.319	0.276
	1111	1.11111		1.239	1.26		0.978	1.07		1.335	1.183		1.016	0.92		1.485	1.403		1.288	1.149		0.75	0.627
	3333	3.33333		1.314	1.381		1.188	1.11		1.465	1.406		1.204	1.175		1.655	1.617		1.401	1.279		1.032	1.017
	10000	10		1.417	1.433		1.208	1.371		1.622	1.513		1.459	1.407		1.749	1.758		1.634	1.603		1.327	1.367

## Sheet: MUNANA
	NA concentration
	ng/mL	µg/mL		msN1			N1/09			N1/09 hybrid			N1/19 hybrid			PR8 N1			PR8 N1 hybrid			mS hybrid
	0	0		557	535		574	550		610	610		590	567		588	600		568	565		578	562
	14	0.013717		38838	39750		3726	3828		43878	41904		4168	4273		4391	3162		2929	3517		799	787
	41	0.041152		55237	55979		9246	10458		56388	50448		10126	12505		10941	7937		7075	8731		1619	1392
	123	0.123457		49871	55002		22826	25556		53631	54039		26435	28331		22688	19885		15516	21401		4258	2940
	370	0.37037		55452	57036		47524	49926		60039	59035		50363	50373		45052	40252		43528	47532		17112	12604
	1111	1.11111		54771	55532		54659	54565		56138	53782		51419	51993		55883	48686		47505	51710		44332	42736
	3333	3.33333		46632	53189		52569	52559		57457	54296		52759	51848		52002	54350		53993	54648		55212	47826
	10000	10		45530	49422		50017	50140		60489	54172		46740	52239		56276	57869		53458	50959		55172	45586

## Sheet: Tm
	msN1			N1/09			N1/09 hybrid			N1/19 hybrid			PR8 N1			PR8 N1 hybrid			mS hybrid
	T [°C]	Ratio 350 nm / 330 nm		T [°C]	Ratio 350 nm / 330 nm		T [°C]	Ratio 350 nm / 330 nm		T [°C]	Ratio 350 nm / 330 nm		T [°C]	Ratio 350 nm / 330 nm		T [°C]	Ratio 350 nm / 330 nm		T [°C]	Ratio 350 nm / 330 nm
	20.023	-0.00036		20.0051	0.00048		20.0035	8e-05		20.0032	-0.00033		20.0024	0.00011		20.0028	-5e-05		20.0025	0.00016
	20.2574	-0.00038		20.2302	0.00049		20.2474	3e-05		20.2471	-0.00033		20.2275	0.00011		20.2467	-6e-05		20.2464	0.00012
	20.4918	-0.00039		20.4552	0.0005		20.4913	-1e-05		20.491	-0.00032		20.4526	0.00012		20.4907	-6e-05		20.4903	9e-05
	20.7262	-0.00041		20.6803	0.00051		20.7352	-6e-05		20.7349	-0.00032		20.6776	0.00012		20.7346	-6e-05		20.7342	5e-05
	20.9607	-0.00043		20.9054	0.00052		20.9792	-0.0001		20.9788	-0.00032		20.9027	0.00012		20.9785	-6e-05		20.9781	2e-05
	21.1951	-0.00044		21.1305	0.00053		21.2231	-0.00015		21.2227	-0.00032		21.1278	0.00012		21.2224	-7e-05		21.2221	-1e-05
	21.4295	-0.00046		21.3555	0.00054		21.467	-0.00019		21.4666	-0.00032		21.3529	0.00012		21.4663	-7e-05		21.466	-5e-05
	21.664	-0.00048		21.5806	0.00055		21.7109	-0.00023		21.7106	-0.00032		21.578	0.00012		21.7102	-7e-05		21.7099	-8e-05
	21.8984	-0.0005		21.8057	0.00056		21.9548	-0.00027		21.9545	-0.00032		21.803	0.00012		21.9541	-8e-05		21.9538	-0.00011
	22.1328	-0.00052		22.0308	0.00057		22.1987	-0.00031		22.1984	-0.00032		22.0281	0.00011		22.1981	-8e-05		22.1977	-0.00014
	22.3672	-0.00054		22.2558	0.00059		22.4426	-0.00035		22.4423	-0.00031		22.2532	0.00011		22.442	-8e-05		22.4417	-0.00017
	22.6017	-0.00056		22.4809	0.0006		22.6865	-0.00039		22.6862	-0.00031		22.4783	0.0001		22.6859	-8e-05		22.6856	-0.0002
	22.8361	-0.00058		22.706	0.00062		22.9304	-0.00043		22.9301	-0.00031		22.7034	0.0001		22.9298	-9e-05		22.9295	-0.00024
	23.0705	-0.0006		22.9311	0.00063		23.1743	-0.00047		23.174	-0.00031		22.9284	9e-05		23.1737	-9e-05		23.1734	-0.00027
	23.3049	-0.00062		23.1561	0.00065		23.4183	-0.00051		23.4179	-0.00031		23.1535	8e-05		23.4176	-8e-05		23.4173	-0.0003
	23.5394	-0.00064		23.3812	0.00066		23.6622	-0.00054		23.6619	-0.00031		23.3786	7e-05		23.6616	-8e-05		23.6613	-0.00032
	23.7738	-0.00067		23.6063	0.00068		23.9061	-0.00056		23.9058	-0.00031		23.6037	6e-05		23.9055	-8e-05		23.9052	-0.00035
	24.0082	-0.00071		23.8313	0.0007		24.15	-0.00058		24.1497	-0.00032		23.8287	3e-05		24.1494	-9e-05		24.1491	-0.00037
	24.2426	-0.00074		24.0564	0.00071		24.3939	-0.00059		24.3936	-0.00032		24.0538	1e-05		24.3933	-0.0001		24.393	-0.00039
	24.4771	-0.00079		24.2815	0.00072		24.6378	-0.00061		24.6375	-0.00033		24.2789	-2e-05		24.6372	-0.00011		24.6369	-0.0004
	24.7115	-0.00083		24.5066	0.00073		24.8817	-0.00061		24.8814	-0.00034		24.504	-4e-05		24.8811	-0.00013		24.8808	-0.00041
	24.9459	-0.00088		24.7316	0.00074		25.1256	-0.00062		25.1253	-0.00035		24.7291	-6e-05		25.125	-0.00015		25.1248	-0.00042
	25.1803	-0.00093		24.9567	0.00075		25.3695	-0.00063		25.3693	-0.00036		24.9541	-8e-05		25.369	-0.00017		25.3687	-0.00041
	25.4148	-0.00098		25.1818	0.00076		25.6135	-0.00064		25.6132	-0.00037		25.1792	-0.0001		25.6129	-0.00019		25.6126	-0.00041
	25.6492	-0.00104		25.4069	0.00076		25.8574	-0.00065		25.8571	-0.00038		25.4043	-0.00013		25.8568	-0.00021		25.8565	-0.0004
	25.8836	-0.00109		25.6319	0.00077		26.1013	-0.00066		26.101	-0.00038		25.6294	-0.00015		26.1007	-0.00024		26.1004	-0.00038
	26.118	-0.00116		25.857	0.00078		26.3452	-0.00068		26.3449	-0.00039		25.8545	-0.00018		26.3446	-0.00027		26.3444	-0.00037
	26.3525	-0.00122		26.0821	0.00078		26.5891	-0.0007		26.5888	-0.0004		26.0795	-0.00021		26.5885	-0.0003		26.5883	-0.00036
	26.5869	-0.00128		26.3071	0.00077		26.833	-0.00072		26.8327	-0.00041		26.3046	-0.00025		26.8325	-0.00033		26.8322	-0.00035
	26.8213	-0.00135		26.5322	0.00076		27.0769	-0.00074		27.0766	-0.00042		26.5297	-0.00028		27.0764	-0.00037		27.0761	-0.00035
	27.0557	-0.00142		26.7573	0.00075		27.3208	-0.00076		27.3206	-0.00042		26.7548	-0.00031		27.3203	-0.00042		27.32	-0.00035
	27.2902	-0.00148		26.9824	0.00073		27.5647	-0.00078		27.5645	-0.00043		26.9799	-0.00033		27.5642	-0.00046		27.5639	-0.00036
	27.5246	-0.00155		27.2074	0.00069		27.8087	-0.0008		27.8084	-0.00044		27.2049	-0.00035		27.8081	-0.0005		27.8079	-0.00037
	27.759	-0.00161		27.4325	0.00065		28.0526	-0.00082		28.0523	-0.00045		27.43	-0.00036		28.052	-0.00054		28.0518	-0.00038
	27.9935	-0.00167		27.6576	0.0006		28.2965	-0.00084		28.2962	-0.00045		27.6551	-0.00036		28.296	-0.00058		28.2957	-0.00038
	28.2279	-0.00173		27.8827	0.00055		28.5404	-0.00087		28.5401	-0.00046		27.8802	-0.00036		28.5399	-0.00062		28.5396	-0.00039
	28.4623	-0.00179		28.1077	0.0005		28.7843	-0.0009		28.784	-0.00046		28.1052	-0.00035		28.7838	-0.00065		28.7835	-0.00039
	28.6967	-0.00185		28.3328	0.00045		29.0282	-0.00093		29.028	-0.00046		28.3303	-0.00035		29.0277	-0.00068		29.0275	-0.00039
	28.9312	-0.00191		28.5579	0.00041		29.2721	-0.00096		29.2719	-0.00046		28.5554	-0.00035		29.2716	-0.0007		29.2714	-0.00039
	29.1656	-0.00196		28.783	0.00038		29.516	-0.00099		29.5158	-0.00045		28.7805	-0.00035		29.5155	-0.00073		29.5153	-0.00039
	29.4	-0.00201		29.008	0.00036		29.7599	-0.00102		29.7597	-0.00045		29.0056	-0.00036		29.7595	-0.00076		29.7592	-0.00039
	29.6344	-0.00206		29.2331	0.00034		30.0038	-0.00105		30.0036	-0.00044		29.2306	-0.00037		30.0034	-0.00079		30.0031	-0.0004
	29.8689	-0.00211		29.4582	0.00032		30.2478	-0.00108		30.2475	-0.00044		29.4557	-0.00039		30.2473	-0.00082		30.247	-0.00041
	30.1033	-0.00216		29.6832	0.0003		30.4917	-0.0011		30.4914	-0.00043		29.6808	-0.00041		30.4912	-0.00085		30.491	-0.00042
	30.3377	-0.0022		29.9083	0.00028		30.7356	-0.00112		30.7353	-0.00042		29.9059	-0.00042		30.7351	-0.00087		30.7349	-0.00043
	30.5721	-0.00224		30.1334	0.00026		30.9795	-0.00113		30.9793	-0.00041		30.131	-0.00044		30.979	-0.0009		30.9788	-0.00044
	30.8066	-0.00227		30.3585	0.00024		31.2234	-0.00115		31.2232	-0.0004		30.356	-0.00044		31.2229	-0.00092		31.2227	-0.00044
	31.041	-0.0023		30.5835	0.00021		31.4673	-0.00117		31.4671	-0.0004		30.5811	-0.00044		31.4669	-0.00093		31.4666	-0.00044
	31.2754	-0.00233		30.8086	0.00018		31.7112	-0.00119		31.711	-0.00039		30.8062	-0.00044		31.7108	-0.00095		31.7106	-0.00043
	31.5098	-0.00236		31.0337	0.00015		31.9551	-0.00122		31.9549	-0.00039		31.0313	-0.00043		31.9547	-0.00097		31.9545	-0.00042
	31.7443	-0.00238		31.2588	0.00012		32.199	-0.00125		32.1988	-0.00039		31.2564	-0.00042		32.1986	-0.00098		32.1984	-0.00041
	31.9787	-0.0024		31.4838	9e-05		32.443	-0.00129		32.4427	-0.00039		31.4814	-0.00042		32.4425	-0.001		32.4423	-0.0004
	32.2131	-0.00241		31.7089	5e-05		32.6869	-0.00133		32.6867	-0.00039		31.7065	-0.00041		32.6864	-0.001		32.6862	-0.0004
	32.4475	-0.00243		31.934	1e-05		32.9308	-0.00137		32.9306	-0.0004		31.9316	-0.00041		32.9304	-0.001		32.9301	-0.0004
	32.682	-0.00244		32.159	-4e-05		33.1747	-0.00141		33.1745	-0.0004		32.1567	-0.00042		33.1743	-0.001		33.1741	-0.0004
	32.9164	-0.00244		32.3841	-9e-05		33.4186	-0.00144		33.4184	-0.00041		32.3817	-0.00042		33.4182	-0.00099		33.418	-0.0004
	33.1508	-0.00245		32.6092	-0.00015		33.6625	-0.00148		33.6623	-0.00041		32.6068	-0.00043		33.6621	-0.00097		33.6619	-0.00041
	33.3852	-0.00245		32.8343	-0.00021		33.9064	-0.00152		33.9062	-0.00042		32.8319	-0.00044		33.906	-0.00096		33.9058	-0.00042
	33.6197	-0.00245		33.0593	-0.00029		34.1503	-0.00155		34.1501	-0.00042		33.057	-0.00044		34.1499	-0.00094		34.1497	-0.00042
	33.8541	-0.00244		33.2844	-0.00037		34.3942	-0.00158		34.394	-0.00042		33.2821	-0.00043		34.3938	-0.00093		34.3937	-0.00042
	34.0885	-0.00244		33.5095	-0.00046		34.6381	-0.00162		34.638	-0.00041		33.5071	-0.00042		34.6378	-0.00092		34.6376	-0.00041
	34.323	-0.00243		33.7346	-0.00055		34.8821	-0.00165		34.8819	-0.00041		33.7322	-0.0004		34.8817	-0.00091		34.8815	-0.0004
	34.5574	-0.00242		33.9596	-0.00064		35.126	-0.00168		35.1258	-0.0004		33.9573	-0.00037		35.1256	-0.00089		35.1254	-0.0004
	34.7918	-0.00242		34.1847	-0.00074		35.3699	-0.00171		35.3697	-0.00039		34.1824	-0.00035		35.3695	-0.00087		35.3693	-0.00039
	35.0262	-0.0024		34.4098	-0.00083		35.6138	-0.00173		35.6136	-0.00038		34.4075	-0.00032		35.6134	-0.00084		35.6133	-0.00038
	35.2607	-0.00239		34.6349	-0.00092		35.8577	-0.00176		35.8575	-0.00037		34.6325	-0.0003		35.8573	-0.0008		35.8572	-0.00037
	35.4951	-0.00238		34.8599	-0.00102		36.1016	-0.00178		36.1014	-0.00036		34.8576	-0.00028		36.1013	-0.00076		36.1011	-0.00036
	35.7295	-0.00237		35.085	-0.00112		36.3455	-0.00181		36.3453	-0.00034		35.0827	-0.00027		36.3452	-0.00071		36.345	-0.00035
	35.9639	-0.00235		35.3101	-0.00123		36.5894	-0.00183		36.5893	-0.00033		35.3078	-0.00025		36.5891	-0.00066		36.5889	-0.00034
	36.1984	-0.00233		35.5351	-0.00135		36.8333	-0.00184		36.8332	-0.00031		35.5329	-0.00024		36.833	-0.00062		36.8328	-0.00033
	36.4328	-0.00231		35.7602	-0.00146		37.0773	-0.00186		37.0771	-0.00029		35.7579	-0.00023		37.0769	-0.00057		37.0768	-0.00032
	36.6672	-0.00228		35.9853	-0.00158		37.3212	-0.00187		37.321	-0.00028		35.983	-0.00022		37.3208	-0.00053		37.3207	-0.0003
	36.9016	-0.00226		36.2104	-0.0017		37.5651	-0.00187		37.5649	-0.00026		36.2081	-0.00021		37.5648	-0.00049		37.5646	-0.00029
	37.1361	-0.00224		36.4354	-0.00182		37.809	-0.00187		37.8088	-0.00025		36.4332	-0.0002		37.8087	-0.00046		37.8085	-0.00028
	37.3705	-0.00221		36.6605	-0.00193		38.0529	-0.00187		38.0527	-0.00025		36.6583	-0.00018		38.0526	-0.00042		38.0524	-0.00027
	37.6049	-0.00218		36.8856	-0.00204		38.2968	-0.00187		38.2967	-0.00025		36.8833	-0.00017		38.2965	-0.00038		38.2964	-0.00025
	37.8393	-0.00216		37.1107	-0.00214		38.5407	-0.00187		38.5406	-0.00026		37.1084	-0.00015		38.5404	-0.00035		38.5403	-0.00024
	38.0738	-0.00213		37.3357	-0.00225		38.7846	-0.00186		38.7845	-0.00028		37.3335	-0.00013		38.7843	-0.00031		38.7842	-0.00023
	38.3082	-0.00211		37.5608	-0.00236		39.0285	-0.00186		39.0284	-0.0003		37.5586	-0.00011		39.0282	-0.00027		39.0281	-0.00022
	38.5426	-0.00209		37.7859	-0.00247		39.2725	-0.00186		39.2723	-0.00032		37.7836	-9e-05		39.2722	-0.00022		39.272	-0.00022
	38.777	-0.00206		38.011	-0.00259		39.5164	-0.00185		39.5162	-0.00035		38.0087	-7e-05		39.5161	-0.00018		39.5159	-0.00021
	39.0115	-0.00204		38.236	-0.00271		39.7603	-0.00185		39.7601	-0.00038		38.2338	-5e-05		39.76	-0.00013		39.7599	-0.00021
	39.2459	-0.00203		38.4611	-0.00285		40.0042	-0.00183		40.004	-0.0004		38.4589	-3e-05		40.0039	-9e-05		40.0038	-0.0002
	39.4803	-0.00201		38.6862	-0.00299		40.2481	-0.00182		40.248	-0.00043		38.684	-1e-05		40.2478	-4e-05		40.2477	-0.0002
	39.7147	-0.00199		38.9112	-0.00313		40.492	-0.00179		40.4919	-0.00045		38.909	2e-05		40.4917	2e-05		40.4916	-0.00019
	39.9492	-0.00197		39.1363	-0.00327		40.7359	-0.00176		40.7358	-0.00047		39.1341	4e-05		40.7357	8e-05		40.7355	-0.00018
	40.1836	-0.00196		39.3614	-0.00341		40.9798	-0.00171		40.9797	-0.00048		39.3592	8e-05		40.9796	0.00014		40.9795	-0.00017
	40.418	-0.00194		39.5865	-0.00353		41.2237	-0.00166		41.2236	-0.00049		39.5843	0.00012		41.2235	0.0002		41.2234	-0.00015
	40.6525	-0.00192		39.8115	-0.00364		41.4676	-0.0016		41.4675	-0.00049		39.8094	0.00016		41.4674	0.00027		41.4673	-0.00013
	40.8869	-0.0019		40.0366	-0.00372		41.7116	-0.00153		41.7114	-0.00049		40.0344	0.00021		41.7113	0.00033		41.7112	-0.00011
	41.1213	-0.00187		40.2617	-0.00378		41.9555	-0.00146		41.9554	-0.00047		40.2595	0.00026		41.9552	0.00039		41.9551	-9e-05
	41.3557	-0.00185		40.4868	-0.00382		42.1994	-0.00138		42.1993	-0.00046		40.4846	0.00032		42.1992	0.00046		42.199	-6e-05
	41.5902	-0.00182		40.7118	-0.00384		42.4433	-0.00129		42.4432	-0.00044		40.7097	0.00037		42.4431	0.00053		42.443	-4e-05
	41.8246	-0.00179		40.9369	-0.00384		42.6872	-0.0012		42.6871	-0.00041		40.9348	0.00043		42.687	0.00062		42.6869	-2e-05
	42.059	-0.00176		41.162	-0.00382		42.9311	-0.00111		42.931	-0.00038		41.1598	0.0005		42.9309	0.00072		42.9308	-1e-05
	42.2934	-0.00172		41.387	-0.00378		43.175	-0.00102		43.1749	-0.00035		41.3849	0.00056		43.1748	0.00083		43.1747	1e-05
	42.5279	-0.00168		41.6121	-0.00373		43.4189	-0.00092		43.4188	-0.00032		41.61	0.00062		43.4187	0.00096		43.4186	2e-05
	42.7623	-0.00163		41.8372	-0.00365		43.6628	-0.00083		43.6627	-0.00029		41.8351	0.00068		43.6627	0.0011		43.6626	3e-05
	42.9967	-0.00158		42.0623	-0.00355		43.9068	-0.00073		43.9067	-0.00026		42.0602	0.00075		43.9066	0.00124		43.9065	4e-05
	43.2311	-0.00153		42.2873	-0.00342		44.1507	-0.00065		44.1506	-0.00024		42.2852	0.00081		44.1505	0.00138		44.1504	4e-05
	43.4656	-0.00146		42.5124	-0.00327		44.3946	-0.00057		44.3945	-0.00022		42.5103	0.00088		44.3944	0.00152		44.3943	5e-05
	43.7	-0.0014		42.7375	-0.0031		44.6385	-0.00049		44.6384	-0.0002		42.7354	0.00095		44.6383	0.00166		44.6382	6e-05
	43.9344	-0.00133		42.9626	-0.00289		44.8824	-0.00043		44.8823	-0.00019		42.9605	0.00102		44.8822	0.00179		44.8821	7e-05
	44.1688	-0.00125		43.1876	-0.00265		45.1263	-0.00037		45.1262	-0.00018		43.1855	0.0011		45.1261	0.00192		45.1261	8e-05
	44.4033	-0.00118		43.4127	-0.00239		45.3702	-0.00033		45.3701	-0.00018		43.4106	0.00118		45.3701	0.00205		45.37	0.0001
	44.6377	-0.00109		43.6378	-0.00209		45.6141	-0.00029		45.6141	-0.00018		43.6357	0.00126		45.614	0.00219		45.6139	0.00011
	44.8721	-0.00101		43.8629	-0.00176		45.858	-0.00027		45.858	-0.00018		43.8608	0.00134		45.8579	0.00233		45.8578	0.00013
	45.1065	-0.00093		44.0879	-0.0014		46.102	-0.00024		46.1019	-0.00018		44.0859	0.00143		46.1018	0.00248		46.1017	0.00015
	45.341	-0.00085		44.313	-0.00102		46.3459	-0.00023		46.3458	-0.00019		44.3109	0.00152		46.3457	0.00264		46.3457	0.00018
	45.5754	-0.00077		44.5381	-0.00063		46.5898	-0.00021		46.5897	-0.00019		44.536	0.00161		46.5896	0.00281		46.5896	0.00021
	45.8098	-0.00069		44.7631	-0.00023		46.8337	-0.0002		46.8336	-0.00019		44.7611	0.00171		46.8336	0.00297		46.8335	0.00025
	46.0442	-0.00061		44.9882	0.00018		47.0776	-0.00019		47.0775	-0.00019		44.9862	0.00182		47.0775	0.00313		47.0774	0.00029
	46.2787	-0.00054		45.2133	0.00059		47.3215	-0.00017		47.3214	-0.00019		45.2113	0.00193		47.3214	0.00328		47.3213	0.00034
	46.5131	-0.00047		45.4384	0.001		47.5654	-0.00016		47.5654	-0.00019		45.4363	0.00205		47.5653	0.00341		47.5652	0.00038
	46.7475	-0.00041		45.6634	0.00141		47.8093	-0.00015		47.8093	-0.00018		45.6614	0.00219		47.8092	0.00353		47.8092	0.00043
	46.9819	-0.00035		45.8885	0.00182		48.0532	-0.00014		48.0532	-0.00018		45.8865	0.00234		48.0531	0.00364		48.0531	0.00046
	47.2164	-0.0003		46.1136	0.00222		48.2971	-0.00012		48.2971	-0.00017		46.1116	0.00249		48.2971	0.00375		48.297	0.0005
	47.4508	-0.00026		46.3387	0.00261		48.5411	-0.00011		48.541	-0.00016		46.3367	0.00266		48.541	0.00385		48.5409	0.00053
	47.6852	-0.00023		46.5637	0.003		48.785	-9e-05		48.7849	-0.00015		46.5617	0.00283		48.7849	0.00394		48.7848	0.00055
	47.9197	-0.0002		46.7888	0.00336		49.0289	-7e-05		49.0288	-0.00014		46.7868	0.00301		49.0288	0.00404		49.0288	0.00056
	48.1541	-0.00018		47.0139	0.00371		49.2728	-5e-05		49.2728	-0.00012		47.0119	0.0032		49.2727	0.00415		49.2727	0.00057
	48.3885	-0.00017		47.2389	0.00404		49.5167	-3e-05		49.5167	-0.0001		47.237	0.0034		49.5166	0.00425		49.5166	0.00058
	48.6229	-0.00017		47.464	0.00434		49.7606	0		49.7606	-7e-05		47.462	0.00361		49.7605	0.00436		49.7605	0.00058
	48.8574	-0.00017		47.6891	0.00463		50.0045	3e-05		50.0045	-4e-05		47.6871	0.00383		50.0045	0.00446		50.0044	0.00058
	49.0918	-0.00017		47.9142	0.00489		50.2484	6e-05		50.2484	0		47.9122	0.00406		50.2484	0.00457		50.2483	0.00058
	49.3262	-0.00018		48.1392	0.00514		50.4923	0.0001		50.4923	6e-05		48.1373	0.00431		50.4923	0.00468		50.4923	0.00058
	49.5606	-0.00019		48.3643	0.00536		50.7363	0.00013		50.7362	0.00012		48.3624	0.00457		50.7362	0.0048		50.7362	0.00057
	49.7951	-0.0002		48.5894	0.00556		50.9802	0.00017		50.9801	0.00018		48.5874	0.00485		50.9801	0.00494		50.9801	0.00056
	50.0295	-0.00021		48.8145	0.00574		51.2241	0.0002		51.2241	0.00026		48.8125	0.00514		51.224	0.00508		51.224	0.00055
	50.2639	-0.00022		49.0395	0.0059		51.468	0.00024		51.468	0.00033		49.0376	0.00545		51.468	0.00526		51.4679	0.00054
	50.4983	-0.00023		49.2646	0.00604		51.7119	0.00027		51.7119	0.00041		49.2627	0.00578		51.7119	0.00546		51.7119	0.00053
	50.7328	-0.00024		49.4897	0.00616		51.9558	0.0003		51.9558	0.00049		49.4878	0.00614		51.9558	0.00569		51.9558	0.00053
	50.9672	-0.00025		49.7148	0.00627		52.1997	0.00034		52.1997	0.00057		49.7128	0.00651		52.1997	0.00597		52.1997	0.00053
	51.2016	-0.00025		49.9398	0.00637		52.4436	0.00038		52.4436	0.00064		49.9379	0.00692		52.4436	0.0063		52.4436	0.00054
	51.436	-0.00026		50.1649	0.00646		52.6875	0.00042		52.6875	0.00072		50.163	0.00736		52.6875	0.00668		52.6875	0.00056
	51.6705	-0.00026		50.39	0.00656		52.9314	0.00047		52.9314	0.00079		50.3881	0.00784		52.9314	0.00712		52.9314	0.00059
	51.9049	-0.00026		50.615	0.00666		53.1754	0.00053		53.1754	0.00086		50.6132	0.00837		53.1754	0.00762		53.1754	0.00063
	52.1393	-0.00027		50.8401	0.00677		53.4193	0.00058		53.4193	0.00092		50.8382	0.00895		53.4193	0.00818		53.4193	0.00068
	52.3737	-0.00027		51.0652	0.00689		53.6632	0.00065		53.6632	0.00098		51.0633	0.00959		53.6632	0.00881		53.6632	0.00074
	52.6082	-0.00027		51.2903	0.00704		53.9071	0.00071		53.9071	0.00102		51.2884	0.01028		53.9071	0.0095		53.9071	0.00082
	52.8426	-0.00027		51.5153	0.0072		54.151	0.00078		54.151	0.00106		51.5135	0.01104		54.151	0.01026		54.151	0.0009
	53.077	-0.00027		51.7404	0.00738		54.3949	0.00085		54.3949	0.00109		51.7385	0.01187		54.3949	0.01107		54.395	0.00099
	53.3115	-0.00027		51.9655	0.00758		54.6388	0.00092		54.6388	0.0011		51.9636	0.01276		54.6389	0.01195		54.6389	0.00109
	53.5459	-0.00028		52.1906	0.0078		54.8827	0.001		54.8828	0.0011		52.1887	0.01372		54.8828	0.01289		54.8828	0.0012
	53.7803	-0.00028		52.4156	0.00803		55.1266	0.00107		55.1267	0.00108		52.4138	0.01474		55.1267	0.01388		55.1267	0.00132
	54.0147	-0.00028		52.6407	0.00828		55.3706	0.00116		55.3706	0.00105		52.6389	0.01582		55.3706	0.01491		55.3706	0.00146
	54.2492	-0.00029		52.8658	0.00854		55.6145	0.00125		55.6145	0.00101		52.8639	0.01695		55.6145	0.01598		55.6146	0.00162
	54.4836	-0.00029		53.0909	0.00882		55.8584	0.00136		55.8584	0.00097		53.089	0.01814		55.8584	0.01706		55.8585	0.0018
	54.718	-0.00029		53.3159	0.00912		56.1023	0.00148		56.1023	0.00091		53.3141	0.01935		56.1024	0.01814		56.1024	0.002
	54.9524	-0.00029		53.541	0.00943		56.3462	0.00162		56.3462	0.00085		53.5392	0.0206		56.3463	0.0192		56.3463	0.00223
	55.1869	-0.00029		53.7661	0.00975		56.5901	0.00178		56.5901	0.00079		53.7643	0.02184		56.5902	0.02021		56.5902	0.00248
	55.4213	-0.00028		53.9911	0.01009		56.834	0.00197		56.8341	0.00072		53.9893	0.02308		56.8341	0.02114		56.8341	0.00275
	55.6557	-0.00027		54.2162	0.01043		57.0779	0.0022		57.078	0.00066		54.2144	0.02427		57.078	0.02196		57.0781	0.00305
	55.8901	-0.00025		54.4413	0.01078		57.3218	0.00245		57.3219	0.00059		54.4395	0.02541		57.3219	0.02266		57.322	0.00338
	56.1246	-0.00023		54.6664	0.01112		57.5658	0.00275		57.5658	0.00053		54.6646	0.02645		57.5658	0.02321		57.5659	0.00373
	56.359	-0.00021		54.8914	0.01146		57.8097	0.00308		57.8097	0.00047		54.8897	0.02737		57.8098	0.02359		57.8098	0.00412
	56.5934	-0.00018		55.1165	0.01177		58.0536	0.00347		58.0536	0.00042		55.1147	0.02814		58.0537	0.02379		58.0537	0.00454
	56.8278	-0.00015		55.3416	0.01206		58.2975	0.0039		58.2975	0.00037		55.3398	0.02875		58.2976	0.0238		58.2977	0.005
	57.0623	-0.00011		55.5667	0.01231		58.5414	0.0044		58.5415	0.00033		55.5649	0.02915		58.5415	0.02361		58.5416	0.00552
	57.2967	-7e-05		55.7917	0.01252		58.7853	0.00498		58.7854	0.0003		55.79	0.02935		58.7854	0.02322		58.7855	0.00609
	57.5311	-2e-05		56.0168	0.01268		59.0292	0.00563		59.0293	0.00027		56.0151	0.02932		59.0293	0.02264		59.0294	0.00672
	57.7655	3e-05		56.2419	0.01279		59.2731	0.00637		59.2732	0.00025		56.2401	0.02906		59.2733	0.02188		59.2733	0.00742
	58	8e-05		56.4669	0.01284		59.517	0.00722		59.5171	0.00024		56.4652	0.02857		59.5172	0.02096		59.5172	0.0082
	58.2344	0.00014		56.692	0.01283		59.7609	0.00819		59.761	0.00024		56.6903	0.02785		59.7611	0.01988		59.7612	0.00905
	58.4688	0.00021		56.9171	0.01276		60.0049	0.00928		60.0049	0.00024		56.9154	0.02693		60.005	0.01869		60.0051	0.00998
	58.7032	0.00027		57.1422	0.01263		60.2488	0.01051		60.2488	0.00026		57.1404	0.02581		60.2489	0.0174		60.249	0.011
	58.9377	0.00035		57.3672	0.01242		60.4927	0.01187		60.4928	0.00028		57.3655	0.02452		60.4928	0.01604		60.4929	0.01209
	59.1721	0.00043		57.5923	0.01214		60.7366	0.01337		60.7367	0.00032		57.5906	0.02308		60.7368	0.01463		60.7368	0.01327
	59.4065	0.00051		57.8174	0.0118		60.9805	0.01501		60.9806	0.00036		57.8157	0.02153		60.9807	0.01321		60.9808	0.01453
	59.6409	0.00061		58.0425	0.01139		61.2244	0.01678		61.2245	0.00042		58.0408	0.01989		61.2246	0.01179		61.2247	0.01587
	59.8754	0.0007		58.2675	0.01093		61.4683	0.01867		61.4684	0.00049		58.2658	0.01819		61.4685	0.01041		61.4686	0.01728
	60.1098	0.00081		58.4926	0.01042		61.7122	0.02066		61.7123	0.00058		58.4909	0.01646		61.7124	0.00908		61.7125	0.01875
	60.3442	0.00093		58.7177	0.00986		61.9561	0.02272		61.9562	0.00067		58.716	0.01472		61.9563	0.00784		61.9564	0.02027
	60.5787	0.00106		58.9427	0.00926		62.2001	0.02482		62.2001	0.00077		58.9411	0.013		62.2002	0.00669		62.2003	0.02181
	60.8131	0.00119		59.1678	0.00864		62.444	0.02691		62.4441	0.00087		59.1662	0.01134		62.4442	0.00565		62.4443	0.02333
	61.0475	0.00134		59.3929	0.008		62.6879	0.02895		62.688	0.00097		59.3912	0.00974		62.6881	0.00473		62.6882	0.02482
	61.2819	0.00151		59.618	0.00736		62.9318	0.03088		62.9319	0.00108		59.6163	0.00825		62.932	0.00394		62.9321	0.02621
	61.5164	0.00168		59.843	0.00672		63.1757	0.03265		63.1758	0.00118		59.8414	0.00687		63.1759	0.00326		63.176	0.02749
	61.7508	0.00187		60.0681	0.00609		63.4196	0.0342		63.4197	0.00128		60.0665	0.00563		63.4198	0.00271		63.4199	0.02859
	61.9852	0.00208		60.2932	0.00548		63.6635	0.03549		63.6636	0.00139		60.2916	0.00454		63.6637	0.00226		63.6639	0.02948
	62.2196	0.00231		60.5183	0.00491		63.9074	0.03647		63.9075	0.0015		60.5166	0.0036		63.9077	0.0019		63.9078	0.03012
	62.4541	0.00256		60.7433	0.00437		64.1513	0.03711		64.1515	0.00162		60.7417	0.0028		64.1516	0.00163		64.1517	0.03049
	62.6885	0.00284		60.9684	0.00388		64.3952	0.03739		64.3954	0.00176		60.9668	0.00215		64.3955	0.00142		64.3956	0.03057
	62.9229	0.00315		61.1935	0.00343		64.6392	0.03729		64.6393	0.00191		61.1919	0.00163		64.6394	0.00126		64.6395	0.03036
	63.1573	0.00349		61.4186	0.00303		64.8831	0.0368		64.8832	0.00209		61.417	0.00122		64.8833	0.00114		64.8834	0.02984
	63.3918	0.00389		61.6436	0.00268		65.127	0.03594		65.1271	0.00229		61.642	0.0009		65.1272	0.00106		65.1274	0.02905
	63.6262	0.00434		61.8687	0.00238		65.3709	0.03473		65.371	0.00253		61.8671	0.00067		65.3712	0.001		65.3713	0.028
	63.8606	0.00485		62.0938	0.00211		65.6148	0.0332		65.6149	0.00281		62.0922	0.00049		65.6151	0.00097		65.6152	0.02671
	64.095	0.00545		62.3188	0.00189		65.8587	0.03138		65.8588	0.00313		62.3173	0.00036		65.859	0.00096		65.8591	0.02522
	64.3295	0.00614		62.5439	0.00171		66.1026	0.02932		66.1028	0.0035		62.5423	0.00027		66.1029	0.00097		66.103	0.02355
	64.5639	0.00693		62.769	0.00156		66.3465	0.02708		66.3467	0.00394		62.7674	0.0002		66.3468	0.00099		66.347	0.02175
	64.7983	0.00783		62.9941	0.00144		66.5904	0.02471		66.5906	0.00446		62.9925	0.00016		66.5907	0.00103		66.5909	0.01985
	65.0327	0.00887		63.2191	0.00134		66.8344	0.02225		66.8345	0.00506		63.2176	0.00013		66.8346	0.00107		66.8348	0.01789
	65.2672	0.01004		63.4442	0.00127		67.0783	0.01978		67.0784	0.00577		63.4427	0.00012		67.0786	0.00111		67.0787	0.01592
	65.5016	0.01134		63.6693	0.00123		67.3222	0.01734		67.3223	0.00661		63.6677	0.00011		67.3225	0.00114		67.3226	0.01397
	65.736	0.01279		63.8944	0.0012		67.5661	0.01498		67.5662	0.00757		63.8928	0.00012		67.5664	0.00117		67.5666	0.01208
	65.9705	0.01437		64.1194	0.00118		67.81	0.01275		67.8102	0.0087		64.1179	0.00013		67.8103	0.00119		67.8105	0.0103
	66.2049	0.01607		64.3445	0.00118		68.0539	0.01069		68.0541	0.00999		64.343	0.00014		68.0542	0.0012		68.0544	0.00865
	66.4393	0.01789		64.5696	0.00119		68.2978	0.00882		68.298	0.01147		64.5681	0.00016		68.2981	0.00122		68.2983	0.00717
	66.6737	0.01978		64.7946	0.00121		68.5417	0.00716		68.5419	0.01314		64.7931	0.00016		68.5421	0.00124		68.5422	0.00586
	66.9081	0.02172		65.0197	0.00122		68.7856	0.00574		68.7858	0.01502		65.0182	0.00017		68.786	0.00127		68.7861	0.00474
	67.1426	0.02368		65.2448	0.00122		69.0295	0.00454		69.0297	0.01709		65.2433	0.00017		69.0299	0.00131		69.0301	0.0038
	67.377	0.0256		65.4699	0.00122		69.2735	0.00356		69.2736	0.01936		65.4684	0.00016		69.2738	0.00134		69.274	0.00304
	67.6114	0.02743		65.6949	0.00122		69.5174	0.00278		69.5175	0.02179		65.6935	0.00016		69.5177	0.00138		69.5179	0.00245
	67.8459	0.02912		65.92	0.00121		69.7613	0.00219		69.7615	0.02437		65.9185	0.00015		69.7616	0.00142		69.7618	0.00199
	68.0803	0.03063		66.1451	0.0012		70.0052	0.00175		70.0054	0.02703		66.1436	0.00015		70.0056	0.00145		70.0057	0.00165
	68.3147	0.03191		66.3702	0.00119		70.2491	0.00145		70.2493	0.02974		66.3687	0.00016		70.2495	0.00147		70.2496	0.00141
	68.5491	0.03291		66.5952	0.00118		70.493	0.00124		70.4932	0.03241		66.5938	0.00017		70.4934	0.00149		70.4936	0.00123
	68.7836	0.0336		66.8203	0.00118		70.7369	0.0011		70.7371	0.03499		66.8188	0.00019		70.7373	0.0015		70.7375	0.0011
	69.018	0.03397		67.0454	0.00118		70.9808	0.00102		70.981	0.03739		67.0439	0.00021		70.9812	0.0015		70.9814	0.00101
	69.2524	0.03398		67.2705	0.00118		71.2247	0.00096		71.2249	0.03954		67.269	0.00022		71.2251	0.0015		71.2253	0.00093
	69.4868	0.03365		67.4955	0.00119		71.4687	0.00093		71.4689	0.04137		67.4941	0.00023		71.469	0.0015		71.4692	0.00088
	69.7213	0.03299		67.7206	0.00119		71.7126	0.00091		71.7128	0.04282		67.7192	0.00023		71.713	0.0015		71.7132	0.00083
	69.9557	0.032		67.9457	0.0012		71.9565	0.00091		71.9567	0.04386		67.9442	0.00022		71.9569	0.0015		71.9571	0.00079
	70.1901	0.03071		68.1707	0.0012		72.2004	0.00091		72.2006	0.04443		68.1693	0.00021		72.2008	0.0015		72.201	0.00076
	70.4245	0.02915		68.3958	0.0012		72.4443	0.00092		72.4445	0.04453		68.3944	0.00019		72.4447	0.00151		72.4449	0.00074
	70.659	0.02735		68.6209	0.00119		72.6882	0.00093		72.6884	0.04414		68.6195	0.00017		72.6886	0.00151		72.6888	0.00072
	70.8934	0.02537		68.846	0.00119		72.9321	0.00095		72.9323	0.04329		68.8446	0.00015		72.9325	0.00152		72.9328	0.0007
	71.1278	0.02325		69.071	0.00118		73.176	0.00096		73.1762	0.04198		69.0696	0.00013		73.1765	0.00153		73.1767	0.00069
	71.3622	0.02103		69.2961	0.00118		73.4199	0.00096		73.4202	0.04025		69.2947	0.00013		73.4204	0.00154		73.4206	0.00067
	71.5967	0.01876		69.5212	0.00118		73.6639	0.00096		73.6641	0.03814		69.5198	0.00012		73.6643	0.00155		73.6645	0.00066
	71.8311	0.01651		69.7463	0.00118		73.9078	0.00096		73.908	0.03571		69.7449	0.00012		73.9082	0.00156		73.9084	0.00065
	72.0655	0.0143		69.9713	0.00119		74.1517	0.00094		74.1519	0.033		69.97	0.00012		74.1521	0.00157		74.1523	0.00065
	72.2999	0.0122		70.1964	0.00119		74.3956	0.00092		74.3958	0.0301		70.195	0.00011		74.396	0.00158		74.3963	0.00064
	72.5344	0.01024		70.4215	0.00119		74.6395	0.0009		74.6397	0.02706		70.4201	0.00011		74.64	0.00159		74.6402	0.00064
	72.7688	0.00844		70.6466	0.00119		74.8834	0.00088		74.8836	0.02398		70.6452	9e-05		74.8839	0.00159		74.8841	0.00065
	73.0032	0.00684		70.8716	0.00119		75.1273	0.00086		75.1275	0.02093		70.8703	8e-05		75.1278	0.00158		75.128	0.00065
	73.2377	0.00545		71.0967	0.0012		75.3712	0.00084		75.3715	0.01797		71.0954	5e-05		75.3717	0.00156		75.3719	0.00066
	73.4721	0.00426		71.3218	0.00121		75.6151	0.00082		75.6154	0.01517		71.3204	2e-05		75.6156	0.00153		75.6159	0.00067
	73.7065	0.00328		71.5468	0.00122		75.859	0.00081		75.8593	0.0126		71.5455	-1e-05		75.8595	0.00149		75.8598	0.00067
	73.9409	0.00248		71.7719	0.00123		76.103	0.00079		76.1032	0.01029		71.7706	-5e-05		76.1034	0.00145		76.1037	0.00067
	74.1754	0.00185		71.997	0.00124		76.3469	0.00078		76.3471	0.00826		71.9957	-8e-05		76.3474	0.00141		76.3476	0.00066
	74.4098	0.00137		72.2221	0.00125		76.5908	0.00076		76.591	0.00654		72.2207	-0.00012		76.5913	0.00138		76.5915	0.00065
	74.6442	0.00102		72.4471	0.00126		76.8347	0.00074		76.8349	0.00511		72.4458	-0.00015		76.8352	0.00136		76.8354	0.00064
	74.8786	0.00077		72.6722	0.00126		77.0786	0.00073		77.0789	0.00397		72.6709	-0.00017		77.0791	0.00135		77.0794	0.00063
	75.1131	0.0006		72.8973	0.00126		77.3225	0.00071		77.3228	0.00308		72.896	-0.00019		77.323	0.00135		77.3233	0.00062
	75.3475	0.00049		73.1224	0.00126		77.5664	0.0007		77.5667	0.00241		73.1211	-0.00021		77.5669	0.00135		77.5672	0.00062
	75.5819	0.00042		73.3474	0.00127		77.8103	0.00069		77.8106	0.00193		73.3461	-0.00022		77.8109	0.00136		77.8111	0.00063
	75.8163	0.00038		73.5725	0.00127		78.0542	0.00069		78.0545	0.00161		73.5712	-0.00023		78.0548	0.00136		78.055	0.00065
	76.0508	0.00037		73.7976	0.00128		78.2982	0.0007		78.2984	0.00141		73.7963	-0.00024		78.2987	0.00136		78.299	0.00067
	76.2852	0.00036		74.0226	0.0013		78.5421	0.00071		78.5423	0.0013		74.0214	-0.00026		78.5426	0.00135		78.5429	0.0007
	76.5196	0.00037		74.2477	0.00132		78.786	0.00072		78.7862	0.00127		74.2465	-0.00027		78.7865	0.00134		78.7868	0.00073
	76.754	0.00038		74.4728	0.00134		79.0299	0.00074		79.0302	0.00129		74.4715	-0.00028		79.0304	0.00133		79.0307	0.00075
	76.9885	0.00039		74.6979	0.00137		79.2738	0.00075		79.2741	0.00134		74.6966	-0.00029		79.2744	0.00131		79.2746	0.00077
	77.2229	0.00041		74.9229	0.0014		79.5177	0.00077		79.518	0.00143		74.9217	-0.0003		79.5183	0.0013		79.5185	0.00079
	77.4573	0.00042		75.148	0.00143		79.7616	0.00079		79.7619	0.00153		75.1468	-0.00031		79.7622	0.00129		79.7625	0.0008
	77.6917	0.00044		75.3731	0.00145		80.0055	0.00081		80.0058	0.00164		75.3718	-0.00032		80.0061	0.00128		80.0064	0.00081
	77.9262	0.00045		75.5982	0.00147		80.2494	0.00083		80.2497	0.00175		75.5969	-0.00032		80.25	0.00127		80.2503	0.00082
	78.1606	0.00047		75.8232	0.00149		80.4934	0.00085		80.4936	0.00185		75.822	-0.00033		80.4939	0.00127		80.4942	0.00083
	78.395	0.00048		76.0483	0.00149		80.7373	0.00086		80.7376	0.00195		76.0471	-0.00034		80.7378	0.00127		80.7381	0.00084
	78.6294	0.0005		76.2734	0.00149		80.9812	0.00088		80.9815	0.00202		76.2722	-0.00036		80.9818	0.00127		80.9821	0.00086
	78.8639	0.00051		76.4985	0.00149		81.2251	0.00089		81.2254	0.00207		76.4972	-0.00038		81.2257	0.00127		81.226	0.00088
	79.0983	0.00052		76.7235	0.00148		81.469	0.0009		81.4693	0.00209		76.7223	-0.0004		81.4696	0.00127		81.4699	0.00089
	79.3327	0.00053		76.9486	0.00147		81.7129	0.0009		81.7132	0.00207		76.9474	-0.00042		81.7135	0.00127		81.7138	0.0009
	79.5672	0.00054		77.1737	0.00147		81.9568	0.0009		81.9571	0.00203		77.1725	-0.00045		81.9574	0.00127		81.9577	0.0009
	79.8016	0.00055		77.3987	0.00148		82.2007	0.0009		82.201	0.00196		77.3976	-0.00048		82.2013	0.00127		82.2017	0.00089
	80.036	0.00056		77.6238	0.00148		82.4446	0.0009		82.4449	0.00186		77.6226	-0.0005		82.4453	0.00127		82.4456	0.00087
	80.2704	0.00056		77.8489	0.00149		82.6886	0.00089		82.6889	0.00175		77.8477	-0.00052		82.6892	0.00128		82.6895	0.00085
	80.5049	0.00057		78.074	0.00148		82.9325	0.0009		82.9328	0.00162		78.0728	-0.00054		82.9331	0.00129		82.9334	0.00083
	80.7393	0.00057		78.299	0.00147		83.1764	0.0009		83.1767	0.00148		78.2979	-0.00057		83.177	0.00131		83.1773	0.00081
	80.9737	0.00057		78.5241	0.00145		83.4203	0.00091		83.4206	0.00134		78.523	-0.0006		83.4209	0.00134		83.4212	0.0008
	81.2081	0.00057		78.7492	0.00141		83.6642	0.00092		83.6645	0.00118		78.748	-0.00064		83.6648	0.00138		83.6652	0.00079
	81.4426	0.00057		78.9743	0.00138		83.9081	0.00093		83.9084	0.00103		78.9731	-0.00069		83.9088	0.00142		83.9091	0.0008
	81.677	0.00057		79.1993	0.00135		84.152	0.00094		84.1523	0.00086		79.1982	-0.00075		84.1527	0.00148		84.153	0.00081
	81.9114	0.00057		79.4244	0.00132		84.3959	0.00094		84.3963	0.0007		79.4233	-0.00081		84.3966	0.00154		84.3969	0.00083
	82.1458	0.00057		79.6495	0.0013		84.6398	0.00095		84.6402	0.00054		79.6484	-0.00088		84.6405	0.00162		84.6408	0.00086
	82.3803	0.00056		79.8745	0.00129		84.8837	0.00095		84.8841	0.00039		79.8734	-0.00094		84.8844	0.0017		84.8848	0.00088
	82.6147	0.00055		80.0996	0.00127		85.1277	0.00096		85.128	0.00024		80.0985	-0.001		85.1283	0.00179		85.1287	0.0009
	82.8491	0.00054		80.3247	0.00126		85.3716	0.00096		85.3719	0.00011		80.3236	-0.00105		85.3722	0.00187		85.3726	0.0009
	83.0835	0.00054		80.5498	0.00125		85.6155	0.00097		85.6158	-1e-05		80.5487	-0.00108		85.6162	0.00194		85.6165	0.00089
	83.318	0.00053		80.7748	0.00124		85.8594	0.00098		85.8597	-0.00011		80.7738	-0.00111		85.8601	0.00198		85.8604	0.00087
	83.5524	0.00053		80.9999	0.00124		86.1033	0.001		86.1036	-0.0002		80.9988	-0.00114		86.104	0.002		86.1043	0.00083
	83.7868	0.00053		81.225	0.00124		86.3472	0.00102		86.3476	-0.00026		81.2239	-0.00116		86.3479	0.00199		86.3483	0.00078
	84.0212	0.00053		81.4501	0.00124		86.5911	0.00104		86.5915	-0.00031		81.449	-0.0012		86.5918	0.00194		86.5922	0.00072
	84.2557	0.00053		81.6751	0.00126		86.835	0.00105		86.8354	-0.00035		81.6741	-0.00125		86.8357	0.00182		86.8361	0.00062
	84.4901	0.00054		81.9002	0.00127		87.0789	0.00107		87.0793	-0.00038		81.8991	-0.00133		87.0797	0.00168		87.08	0.00053
	84.7245	0.00055		82.1253	0.00129		87.3229	0.00108		87.3232	-0.00041		82.1242	-0.00142		87.3236	0.00155		87.3239	0.00044
	84.9589	0.00056		82.3503	0.0013		87.5668	0.00109		87.5671	-0.00043		82.3493	-0.00152		87.5675	0.00142		87.5679	0.00035
	85.1934	0.00057		82.5754	0.0013		87.8107	0.0011		87.811	-0.00046		82.5744	-0.00163		87.8114	0.00129		87.8118	0.00026
	85.4278	0.00058		82.8005	0.00129		88.0546	0.00111		88.055	-0.00049		82.7995	-0.00174		88.0553	0.00115		88.0557	0.00017
	85.6622	0.00059		83.0256	0.00128		88.2985	0.00112		88.2989	-0.00052		83.0245	-0.00184		88.2992	0.00102		88.2996	7e-05
	85.8967	0.00061		83.2506	0.00127		88.5424	0.00113		88.5428	-0.00054		83.2496	-0.00191		88.5432	0.00089		88.5435	-2e-05
	86.1311	0.00062		83.4757	0.00126		88.7863	0.00114		88.7867	-0.00057		83.4747	-0.00197		88.7871	0.00075		88.7874	-0.00012
	86.3655	0.00063		83.7008	0.00125		89.0302	0.00115		89.0306	-0.00061		83.6998	-0.002		89.031	0.0006		89.0314	-0.00023
	86.5999	0.00064		83.9259	0.00125		89.2741	0.00116		89.2745	-0.00064		83.9249	-0.00202		89.2749	0.00045		89.2753	-0.00033
	86.8344	0.00065		84.1509	0.00125		89.5181	0.00117		89.5184	-0.00067		84.1499	-0.00202		89.5188	0.00029		89.5192	-0.00044
	87.0688	0.00066		84.376	0.00127		89.762	0.00118		89.7623	-0.00071		84.375	-0.00203		89.7627	0.00013		89.7631	-0.00055
	87.3032	0.00067		84.6011	0.0013		90.0059	0.00119		90.0063	-0.00074		84.6001	-0.00203		90.0066	-4e-05		90.007	-0.00066
	87.5376	0.00068		84.8262	0.00133								84.8252	-0.00205
	87.7721	0.00069		85.0512	0.00137								85.0503	-0.00209
	88.0065	0.0007		85.2763	0.0014								85.2753	-0.00213
	88.2409	0.00072		85.5014	0.00143								85.5004	-0.00219
	88.4753	0.00073		85.7264	0.00144								85.7255	-0.00226
	88.7098	0.00074		85.9515	0.00144								85.9506	-0.00233
	88.9442	0.00075		86.1766	0.00142								86.1756	-0.00241
	89.1786	0.00076		86.4017	0.00138								86.4007	-0.0025
	89.413	0.00076		86.6267	0.00133								86.6258	-0.00264
	89.6475	0.00077		86.8518	0.00129								86.8509	-0.00279
	89.8819	0.00078		87.0769	0.00124								87.076	-0.00294
	90.1163	0.00079		87.302	0.0012								87.301	-0.00309
				87.527	0.00117								87.5261	-0.00325
				87.7521	0.00113								87.7512	-0.0034
				87.9772	0.0011								87.9763	-0.00355
				88.2023	0.00106								88.2014	-0.00371
				88.4273	0.00102								88.4264	-0.00388
				88.6524	0.00099								88.6515	-0.00405
				88.8775	0.00095								88.8766	-0.00422
				89.1025	0.00091								89.1017	-0.0044
				89.3276	0.00086								89.3268	-0.00458
				89.5527	0.00082								89.5518	-0.00476
				89.7778	0.00077								89.7769	-0.00496
				90.0028	0.00072								90.002	-0.00515
