# Supplementary material for: Structure-guided loop grafting improves expression and stability of influenza neuraminidase for vaccine development
Source: eLife. 2025 Sep 9;14:RP105317. doi: 10.7554/eLife.105317 (PMC12419796; doi:10.7554/eLife.105317)
Supplement: Figure 3—source data 2. [file elife-105317-fig3-data2.xlsx]

## Sheet: Related to Fig 3b
			mSN1	N1/09	N1/09 (cell)	N1/09 hybrid	N1/19 (cell)	N1/19 hybrid
	Z2B3		104.1	24.8	87.5	87.7	16.6	49.5
	NmAb-16		101.5	42.7	65.6	85.3	98.3	99.5
	NmAb-25		100	100	100	100	100	100
	NmAb-05		98.4	104.2	67.5	97.3	107.6	105.6
	NmAb-20		97.7	105	92.6	97.9	86	103.7
	NmAb-02		96.9	104.9	87.7	98	64.9	101.3
	AF9C		93.6	56.9	41.7	88.9	71.7	79.6
	1G01		88.8	90.1	97.1	74.7	57.7	82
	24-1C		88.1	102	86.5	91.4	66.7	100.6
	AG7C		84.3	110.1	95.2	83.6	86.8	90.7
	CD6		81.7	33.2	47.8	91.5	0	96.8
	Z2C2		77.6	19.6	86.4	89.9	0	1.4
	NmAb-14		74.8	104.9	116.5	80.6	103.5	90.1
	NmAb-21		50.3	36.8	55.1	97.4	95.8	100.3
	NmAb-13		32	28.9	19.1	31.4	23.1	37.9
	Nmab-15		18.8	66.7	106.3	78.2	105.9	83.6
	NmAb-18		10.6	35.4	117.2	79.2	87.8	107.1
	NmAb-01		4.3	42.8	67.8	94	53.9	79
	NmAb-04		2	69.5	84.6	102	89.1	110.3
	NmAb-28		0	111	100	97.4	62.1	81.5
	NmAb-06		0	108.9	81.8	72.2	84.6	103
	NmAb-19		0	85.4	93.5	90.2	51.8	102.8
	NmAb-24		0	106.7	95.3	98.2	97.2	94.7
	NmAb-27		0	89.4	92.2	97.2	77.7	98.4
	NmAb-03		0	3.4	0	0	85.8	100.5
	Isotype		0	0	0	0	0	0

## Sheet: Related to Fig 6c
			PR8	PR8 hybrid	mSN1	mS hybrid
	NmAb-25		100	100	100	100
	NmAb-14		95	100	75	102
	NmAb-16		94	94	102	64
	AG7C		91	102	84	100
	Z2B3		88	89	104	98
	24-1C		87	103	88	98
	AF9C		87	84	94	101
	1G01		86	73	89	101
	NmAb-03		84	93	0	0
	Z2C2		70	1	78	99
	NmAb-05		54	59	98	104
	NmAb-21		39	22	50	27
	NmAb-20		5	44	98	62
	NmAb-02		1	0	97	91
	NmAb-13		1	0	32	15
	CD6		1	86	82	3
	NmAb-15		0	0	19	0
	Isotype		0	0	0	0
