# Supplementary material for: Structure-guided loop grafting improves expression and stability of influenza neuraminidase for vaccine development
Source: eLife. 2025 Sep 9;14:RP105317. doi: 10.7554/eLife.105317 (PMC12419796; doi:10.7554/eLife.105317)
Supplement: Figure 5—figure supplement 1—source data 1. [file elife-105317-fig5-figsupp1-data1.xlsx]

## Sheet: Sheet1
	Inhibition of H1N1/2009 virus
	Sera dilution	N1/09		mSN1		N1/09 hybrid		N1/19 hybrid		Empty VLP		Naïve mice		AG7C (0.4 mg/mL)
	40	4.93	5.49	9	8.53	3.42	3.09	10.6	10.34	215.67		229.61		1.78	0.85
	80	5.08	7.27	21.73	40.78	16.61	3.42	14.66	15.51	200.15		216.59		0.81	1.53
	160	6.68	6.14	42.11	42.79	3.26	20.85	18.58	21.32	182		188.68		0.48	0.85
	320	8.71	9.21	90.15	81.4	14.33	8.14	53.12	38.93	159.8		173.18		7.92	0.68
	640	15.24	13.57	121.73	118.14	7.65	14.33	63.57	75.44	148.04		186.67		3.23	4.75
	1280	22.21	19.39	131.92	114.57	17.1	14.98	91.44	85.78	133.24		151.63		0.32	4.58
	2560	33.96	42.97	114.77	112.56	39.74	35.18	95.94	101.13	118		137.05		0.65	2.38
	5120	54.72	57.84	111.38	95.66	55.37	59.77	90.86	106.3	109.58		120.78		1.13	2.04
	10240	56.6	70.11	102.21	97.36	70.85	81.92	104.5	98.71	100.44		115.66		1.94	18.51
	20480	68.51	71.08	113.24	87.6	94.14	88.44	80.41	90.63	88.68		100		4.68	5.77
	40960	64.59	69.95	95.42	84.96	85.02	94.63	84.33	97.9	96.37		107.75		5.98	4.92
	Inhibition of H1N1/2021 virus
	Sera dilution	N1/09		mSN1		N1/09 hybrid		N1/19 hybrid		Empty VLP		Naïve mice		AG7C (0.4 mg/mL)
	40	8.37937	6.53775	144.843	147.606	9.76059	12.2468	14.2726	12.2468	151.934		145.948		5.3407	7.91897
	80	9.48435	8.10313	138.858	143.462	14.0884	13.2597	15.5617	12.0626	153.315		145.58		3.407	5.70902
	160	11.6943	11.8785	142.449	130.571	46.4088	42.9098	50	54.2357	140.147		142.357		2.94659	4.32781
	320	32.6888	28.7293	138.674	132.044	96.7772	91.8048	97.4217	89.9632	135.175		138.858		3.31492	5.06446
	640	76.0589	69.8895	141.805	133.886	117.035	105.709	94.291	103.407	121.179		135.083		3.8674	5.98527
	1280	98.5267	97.4217	126.703	127.808	113.72	112.247	111.786	109.945	119.797		125.23		3.95948	9.48435
	2560	110.313	104.788	116.759	115.378	110.958	114.18	116.943	106.906	119.245		120.626		4.78821	8.65562
	5120	100.921	94.1068	104.42	114.088	101.381	110.589	97.6059	104.144	111.602		117.772		5.15654	8.65562
	10240	108.471	104.788	114.365	108.564	113.076	107.366	103.775	95.3039	104.144		113.444		7.91897	13.8122
	20480	92.081	98.1584	106.446	108.103	107.643	115.193	98.8029	102.118	97.0534		106.354		15.3775	26.3352
	40960	130.11	112.247	111.971	117.127	123.112	128.453	106.446	98.0663	97.0534		102.486		31.0313	42.081
	Inhibition of mSN1 protein
	Sera dilution	N1/09		mSN1		N1/09 hybrid		N1/19 hybrid		Empty VLP		Naïve mice		AG7C (0.4 mg/mL)
	40	176.2	194	8.6	2.1	2.8	2.9		164.8	185.1	202.1	199.5	182.7	2.4	3.7
	80	179.8	182.9	2	3.9	5.1	5.9	104.2	179.5	167.1	195.6	196.4	185.9	5.2	5.6
	160	205.8	183.5	2.6	3.9	42.7	37.4	154	177.5	181.4	194.5	175.9	189.7	3.7	4
	320	188.3	172.5	6.8	7	138.4	134.4	172.1	163.9	143.1	181.8	177.9	157.5	7	7.3
	640	173.3	159.4	70	83.8	170.1	155.7	160.5	137	172.5	190.2	180.1	188.4	22	13.9
	1280	163.5	159.3	124.4	143.2	165.3	163.3	152.4	137.4	162.9	178.1	171.1	165.8	85.3	63.3
	2560	142.9	145.1	120.3	134.2	148.7	140.7	151	127.8	150	171.8	179.2	160	83.4	91.7
	5120	131.7	122.5	113.8	121.2	128.6	139.4	124.8	111.8	150.6	168.3	170.1	160.5	91.7	95.2
	10240	128.3	116.7	106.4	111.6	123.8	129.4	122.1	105	132.7	153.6	140.5	140	93	89.3
	20480	110	113.6	101.2	98.5	111.3	114	111.9	100.8	132	133.9	128.3	131.2	95.3	96.1
	40960	104.1	114.6	102.7	94.9	106.7	116.8	104.5	99.4	124.7	126.8	122.8	117.8	93.8	92.6
