# Supplementary material for: Structure-guided loop grafting improves expression and stability of influenza neuraminidase for vaccine development
Source: eLife. 2025 Sep 9;14:RP105317. doi: 10.7554/eLife.105317 (PMC12419796; doi:10.7554/eLife.105317)
Supplement: Figure 5—source data 1. [file elife-105317-fig5-data1.xlsx]

## Sheet: ELLA mSN1 protein
	Mouse group: msN1
	sera dilution		Serum 1		Serum 2		Serum 3		Serum 4		Serum 5		Serum 6
	40		-10.6	-13	-4.6	-4.6	0.7	2.7	-9	-0.5	-7	-1.3	-0.5	-1.7
	120		-13	-10.6	56.5	22.4	4.7	3.5	-8.6	-5	19.1	79	5.9	4.3
	360		-5.4	-4.1	232.4	224.4	202.7	196.3	79.4	62.9	195.9	179.4	104.7	102.3
	1080		111.5	113.9	228	203.5	184.2	184.6	148.9	159.3	149.7	161.7	156.9	166.5
	3240		111.1	125.6	156.1	177.4	153.3	160.9	145.6	143.2	148.9	141.6	147.3	165.7
	9720		111.9	117.1	130.4	126	120.3	126.8	123.6	128.8	131.6	136.4	136.4	134.8
	29160		98.7	99.5	105.5	112.3	111.9	114.3	125.2	109.1	113.1	114.3	125.6	127.2
	N1/09
	sera dilution		Serum 1		Serum 2		Serum 3		Serum 4		Serum 5		Serum 6
	40		229	222	192.2	215.4	193.7	191.1	178.2	155.4	148.8	149.5	205.1	205.5
	120		242.2	234.9	240	230.8	200.7	186	147	148.4	158.7	146.6	240	236.7
	360		213.5	208.4	208.8	208.4	147.7	149.2	136.7	135.2	132.6	133.4	201.8	160.9
	1080		169.4	165.7	167.6	161.7	119.7	124.2	91	118.3	112.4	127.5	152.5	236
	3240		134.1	120.5	125.3	109.1	88.5	88.8	84.8	81.9	94.4	94.4	88.8	246.7
	9720		120.5	112	109.8	98	87	84.4	84.4	76	88.8	97.3	104.3	101.3
	29160		87.4	41.8	88.1	82.6	83.3	73.4	71.2	70.1	74.5	76.7		90.3
	N1/09 hybrid
	sera dilution		Serum 1		Serum 2		Serum 3		Serum 4		Serum 5		Serum 6
	40		-14.1	-10.9	-9.2	-7.9	99.1	110.2	-7.9	-5	2.5	3.5	-0.1	-2.7
	120		-1.1	-1.4	75.6	79.5	175.7	167.9	-6.6	-1.1	75.6	100.7	92.2	96.5
	360		108.5	105.9	121.6	121.3	151.6	148	93.2	123.5	185.2	176.4	146.7	152.6
	1080		118	113.8	120.6	119	120.6	120.6	149.6	154.5	154.5	151.3	120.3	127.8
	3240		95.8	107.6	107.2	107.2	111.8	107.2	127.1	130.1	114.4	119	104.9	117
	9720		92.6	93.9	90.6	90.6	97.8	91.9	105.3	103	107.6	108.5	102.7	118.7
	29160		76.2	65.1	67.4	75.6	73.3	76.6	78.8	71.3	73.3	72.3	79.2	82.1
	N1/19 hybrid
	sera dilution		Serum 1		Serum 2		Serum 3		Serum 4		Serum 5		Serum 6
	40		82.8		192.8	174.3	121.5	99	17.4	28.4	56.2	38.4	139	151.5
	120		127.1	121.8	190.9	189.9	133.4	137.4	143.1	146.5	126.5	129	167.1	143.4
	360		108.1	106.5	176.5	183.4	114	121.2	164.6	158.4	124	119.6	139	127.1
	1080			99	147.1	159.3	102.8	109.6	123.1	131.2	94.3	102.1	96.5	104.6
	3240		96.8	100.6	123.4	126.2	106.5	103.4	111.5	108.4	94.9	109.9	94.9	92.8
	9720		88.1	97.8	106.5	111.2	104	99.3	96.8	103.4	95.6	93.1	97.8	104.3
	29160		94.3	88.7	99	120.6	99.6	99.6	101.8	104	104.6	104.3	98.4	95.9
	Controls
	sera dilution		Empty VLP Pool		AG7C (0.4 mg/mL)
	40		184	214.8	1.8	0.1
	120		192.9	212	1.8	1.5
	360		166.6	193.2	3.4	3.4
	1080		139.2	143	6.2	4.2
	3240			118.9	81	70.7
	9720		113.4	121.7	100.6	95.4
	29160		111.2	107.6	99.5	96.8
	IC50 titres
		mSN1	N1/09	N1/09 hybrid	N1/19 hybrid	AG7C (0.4 mg/mL)
	Mouse 1	435	20	144	20	2428
	Mouse 2	123	20	108	20
	Mouse 3	144	20	20	20
	Mouse 4	357	20	221	41
	Mouse 5	120	20	109	41
	Mouse 6	274	20	102	20

## Sheet: ELLA X-179A Virus
	Mouse group: msN1
	sera dilution		Serum 1		Serum 2		Serum 3		Serum 4		Serum 5		Serum 6
	40		1.2	-1.6	10.6	8.2	13.5	6.5	6.1	6.9	5.3	9.8	11	10.2
	120		2.9	3.7	22.9	21.3	7.4	9	6.5	7.4	9.4	9.8	15.9	13.1
	360		15.1	19.6	67.8	64.6	28.6	30.2	22.5	27.8	42.1	51.9	37.2	31.9
	1080		36	50.3	111.2	111.2	49.5	58	40.9	49	75.2	90.3	49.5	58.9
	3240		64.2	77.2	106.3	104.2	70.3	72.8	65.4	70.7	87.1	99.3	77.2	70.7
	9720		75.2	85	94.4	103	91.6	84.2	77.2	85	89.9	99.3	86.2	94.8
	29160		84.6	96	103.8	111.6	103	104.6	89.5	96.9	103.8	107.1	98.9	95.2
	N1/09
	sera dilution		Serum 1		Serum 2		Serum 3		Serum 4		Serum 5		Serum 6
	40		6.8	5.8	2.7	5.8	2.7	6.8	-4.6	1.6	3.4	6.8	6.5	4.7
	120		9.9	6.5	5.4	5.4	3.7	6.1	7.2	4.4	7.2	6.8	14.8	15.5
	360		30	22.4	11.3	14.1	15.8	17.2	6.5	10.3	11.7	9.9	23.1	24.5
	1080		48.1	52.2	43.9	50.5	42.5	48.1	5.8	12	32.8	37	44.6	52.2
	3240		75.8	80.3	76.8	86.2	83.1	78.9	38.4	37	64.4	76.8	80.6	77.2
	9720		84.8	89.7	92.8	93.8	90.7	92.4	64.4	69.6	90.7	94.5	90.4	97.6
	29160		95.6	88.3	94.5	93.5	98	95.2	84.8	86.9	96.6	107.3	113.6	107.3
	N1/09 hybrid
	sera dilution		Serum 1		Serum 2		Serum 3		Serum 4		Serum 5		Serum 6
	40		-1	-0.1	-1.5	-2.3	1.6	2.9	4.7	7.7	8.1	8.1	6
	120		-2.3	5.5	2.5	2.5	1.6	5.5	6	12.5	3.3	10.3	10.8	21.2
	360		1.2	13.4	6.4	8.6	4.7	6	4.2	6.8	12.1	8.1	12.9	9.4
	1080		1.6	-1.9	35.6	33	10.8	14.2	0.3	5.1	8.1	13.4	10.3	14.7
	3240		12.5	10.8	72.2	72.7	47.4	53.1	9.4	13.4	19	24.3	19.5	19.5
	9720		42.2	46.5	83.1	84.4	82.3	80.5	32.1	39.1	56.5	58.7	57.4	54.4
	29160		73.1	73.5	100.1	103.2	97.5	110.6	74.4	79.7	96.2	104.9	97.5	139.8
	N1/19 hybrid
	sera dilution		Serum 1		Serum 2		Serum 3		Serum 4		Serum 5		Serum 6
	40		-2.5	10.2	3.4	2.5	1.3	5.5	7.2	9.3	13.6	8.5	3	4.2
	120		-3.8	-1.3	1.7	4.2	4.7	5.5	6.8	9.3	6.4	5.9	8.1	9.8
	360		2.1	0.8	0.8	1.3	17.8	22.5	11	13.6	8.1	9.3	11	13.2
	1080		9.8	11	8.1	9.3	53.5	62.8	23.8	33.1	24.2	17.4	25.9	25
	3240		38.6	39.9	39.9	40.3	80.6	86.2	51.8	58.1	48	40.7	50.9	58.1
	9720		60.3	74.7	72.6	70.9	100.2	97.2	82.8	82.3	73	68.8	83.6	87.9
	29160		84.5	99.3	92.1	93.4	119.3	119.3	103.6	109.9	106.5	103.6	111.2	122.2
	Controls
	sera dilution		Empty VLP Pool		AG7C (0.4 mg/mL)
	40		280.6	299.5	7	9
	120		310.9	313.9	8.5	11.4
	360		260.7	249.3	4.5	13.9
	1080		187.1	182.1	4	11.9
	3240		162.2	158.2	12.4	12.9
	9720		139.8	165.2	12.9	13.4
	29160		144.3	151.7	31.3	20.9
	IC50 titres
		mSN1	N1/09	N1/09 hybrid	N1/19 hybrid	AG7C (0.4 mg/mL)
	Mouse 1	1397	1016	11238	5037	>30000
	Mouse 2	275	1176	1751	4628
	Mouse 3	1080	1209	3542	988
	Mouse 4	1383	5152	13607	2847
	Mouse 5	406	1765	8151	4519
	Mouse 6	886	1135	8721	2954
