# Supplementary material for: Structure-guided loop grafting improves expression and stability of influenza neuraminidase for vaccine development
Source: eLife. 2025 Sep 9;14:RP105317. doi: 10.7554/eLife.105317 (PMC12419796; doi:10.7554/eLife.105317)
Supplement: Figure 5—source data 2. [file elife-105317-fig5-data2.xlsx]

## Sheet: Weight Curves
	Day p.i.	N1/09						mSN1						N1/09 hybrid						N1/19 hybrid						Empty VLP (NC)						mAb AG7C 10 mg/kg (PC)
		Mouse 1	Mouse 2	Mouse 3	Mouse 4	Mouse 5	Mouse 6	Mouse 1	Mouse 2	Mouse 3	Mouse 4	Mouse 5	Mouse 6	Mouse 1	Mouse 2	Mouse 3	Mouse 4	Mouse 5	Mouse 6	Mouse 1	Mouse 2	Mouse 3	Mouse 4	Mouse 5	Mouse 6	Mouse 1	Mouse 2	Mouse 3	Mouse 4	Mouse 5	Mouse 6	Mouse 1	Mouse 2	Mouse 3	Mouse 4	Mouse 5	Mouse 6
	0	100	100	100	100	100	100	100	100	100	100	100	100	100	100	100	100	100	100	100	100	100	100	100	100	100	100	none	100	100	100	100	100	100	100	100	100
	1	99	99	100	102	103	102	97	95	98.5	99.3	92.6	93.3	100.3	98	100.3	97.1	98.5	96.5	96.3	98.7	95.2	102.5	97.3	94.8	99.2	100.8		100.7	100.7	100.6	97	97	96	97	96	100
	2	101	98	96	106	100	104	98.8	99.8	103.2	101.1	95.9	96.7	102.9	98.8	98.5	97.2	100.4	97.2	94.5	100	96.7	102.6	96.7	96.6	98.7	103.2		100.4	97.5	98.5	100	101	96	93	92	106
	3	93	88	89	96	95	94	96.5	89.3	97.6	90.3	90.1	93.2	97.8	92.6	99.4	87.3	93.4	94.9	86.5	94.1	90.8	96.6	87.1	89.9	90.4	93.3		89.2	88.1	89.4	94	96	90	90	87	106
	4	90	83	83	95	84	89	88.7	89.6	94.8	86.1	85.6	86	90.3	89.7	90.3	81.1	85.1	90.4	83.2	88.9	91.1	94.8	81.5	91.2	84	86		86	82.3	83.3	92	94	87	86	85	100
	5	88	82	82	90	91	85	85.6	91.8	96.1	84.7	84.6	85.4	91.1	90.4	96.2	83.4	84.1	94.6	81.4	89.6	94.4	94.8	79.6	89.3	79.7	82		84.5	80.8	78.9	92	95	92	91	84	104
	6	96	85	87	96	97	87	90.5	91.5	100.6	86.2	82.3	88.9	93.4	87.6	98.3	86.7	86	94.5	86.2	86.5	96.8	94.9		91.9		80.6		82.6	81.9		93	100	90	93	86	108
	7	100	89	90	101	101	93	94.1	95.2	102.8	84	85	92.9	95.2	87.6	100.2	86.7	87.5	94.6	87.7	89.1	98.7	91.7		91.4		78.7		77.5	78.7		95	104	91	90	89	105
	8	99	90	89	101	97	96	94.3	95.7	100	83.8	87.7	89.3	93.3	91.3	102.1	89.6	89.1	96.5	87.9	91.8	98.6	92.3		94.5							93	105	91	92	91	100
	10	103	91	91	105	99	97	96.5	96.9	101.3	89.1	93.1	93.5	94.9	93	103.9	89	91.5	93.8	91.6	92.7	99.2	94.7		100.6							96	103	95	94	92	101
	13	106	90	98	110	100	99	102.3	101.2	101.8	92.7	101.1	97.6	96.5	95.3	104	91.9	94.6	99.7	96.2	92.5	98	96.9		106.4							99	101	100	95	95	102
	16	108	95	99	104	105	103	102.3	108.4	102.4	97.3	102.4	85.4	97.8	96.6	108.9	97	95.3	94.7	95.9	99.9	100.2	106.5		111.1							98	102	101	100	93	110
