# Supplementary material for: Structure-guided loop grafting improves expression and stability of influenza neuraminidase for vaccine development
Source: eLife. 2025 Sep 9;14:RP105317. doi: 10.7554/eLife.105317 (PMC12419796; doi:10.7554/eLife.105317)
Supplement: Figure 7—source data 1. [file elife-105317-fig7-data1.xlsx]

## Sheet: ELLA_mSN1 protein
	Mouse group: mSN1
	sera dilution		Serum 1		Serum 2		Serum 3		Serum 4		Serum 5		Serum 6
	40		-1.8	-4.2	-3.4	-2.8	-2.6	-1.6	-6	-1.6	-2.6	-0.4	-1	-6.4
	120		-5.6	-5.2	106.1	116.5	38.4	19.6	-2.4	-2.4	139.4	130.3	4.4	2
	360		6.2	9.2	160.2	155.8	140	139	78.9	105.5	133.5	126.7	125.7	119.7
	1080		98.9	91.9	145.8	147	145	145.2	121.5	125.1	117.5	122.3	138.2	127.9
	3240		108.7	98.9	123.7	125.7	121.5	122.1	113.9	109.3	108.7	112.7	118.9	118.5
	9720		90.3	89.1	98.1	100.1	95.1	99.5	95.5	99.9	95.1	105.7	115.7	109.3
	29160		99.3	98.9	100.5	100.3	101.9	103.3	101.1	102.9	99.5	108.7	107.5	111.7
	PR8 N1
	sera dilution		Serum 1		Serum 2		Serum 3		Serum 4		Serum 5		Serum 6
	40		101.6	114.5	144.5	125.6	202.4	195.5	106.3	118.8	142.6	136.7	100.5	93.7
	120		103.9	98	130.9	128.1	171.5	166.7	105	108.9	139.2	137.9	91.2	96.6
	360		98.4	87.7	99.1	94.6	132	127.7	84.6	86.9	124.1	120.4	87.3	77.8
	1080		96.6	88.6	97.1	96.2	118.6	113.8	86.9	94.5	107.3	125.4	94.3	83.2
	3240		93.9	87.1	90.7	92.7	97.7	101.4	88	87.7	94.5	98	92.7	90.2
	9720		86.4	81.9	83	83.7	91.2	88.7	81.9	89.8	94.1	92.8	88.7	88.2
	29160		102.3	89.6	89.6	105	106.1	102.1	97.7	98.7	108	102.3	97	100.9
	PR8 hybrid
	sera dilution		Serum 1		Serum 2		Serum 3		Serum 4		Serum 5		Serum 6
	40		139	132.5	121.9	120.1	116.7	119.2	162	154.1	85.1	90	4.1	5.8
	120		117.1	109.6	114.2	112.1	105.5	107.5	159.9	161.2	155.1	149.5	62.9	64.5
	360		107.1	102.4	101.7	100.9	98.8	100.5	133	132.1	142.2	123.8	117.4	110.5
	1080		97.9	101.1	103.2	103.2	103.8	106.4	116.1	126.9	137.7	133.8	120	119.8
	3240		89	101.3	100.6	102.9	101.3	103.8	112.5	111.3	110.9	115.6	114.8	112.4
	9720		92.4	95.3	94	92.6	94.8	101.1	100.8	101.1	100.8	101.1	100.8	105.6
	29160		95.8	96.7	99.8	99.8	113.4	103.4	106.9	111.4	109.2	109.8	105.5	109.6
	mS hybrid
	sera dilution		Serum 1		Serum 2		Serum 3		Serum 4		Serum 5		Serum 6
	40		0.8	20.4	-4.6	-5.3	-4	-2.7	-4.8	-4.4	-4	-4	-5.1	0
	120		-3.4	-4.6	-5.1	-4.2	-2.3	-1.3	-4	-4.2	-3.8	-1.1	-1.5	-0.6
	360		9.3	9.5	35.2	34.7	71.8	76.6	16.2	53.2	43.6	60	57	66.5
	1080		76.4	82.1	89.2	86.9	87.1	88.4	77.7	86.7	88.2	89.9	89.7	86.5
	3240		85	91.8	91.8	92.4	84.4	94.7	95.5	91.6	86.7	105.6	88	93
	9720		90.3	83.3	85.7	85.4	86.7	87.6	87.5	86.3	86.5	85	84	84.6
	29160		96.6	92.4	97.7	100.6	101.9	96.6	106.5	101.4	98.9	103.1	97	94.3
	Controls
	sera dilution		Empty VLP Pool		AG7C (0.4 mg/mL)
	40		184	214.8	1.8	0.1
	120		192.9	212	1.8	1.5
	360		166.6	193.2	3.4	3.4
	1080		139.2	143	6.2	4.2
	3240			118.9	81	70.7
	9720		113.4	121.7	100.6	95.4
	29160		111.2	107.6	99.5	96.8
	IC50 titres
		mSN1	PR8	PR8 hybrid	mS hybrid	AG7C (0.4 mg/mL)
	Mouse 1	435	20	700	20	2426
	Mouse 2	123	20	436	20
	Mouse 3	144	20	279	20
	Mouse 4	357	20	482	20
	Mouse 5	120	20	353	20
	Mouse 6	274	20	316	115

## Sheet: ELLA_PR8 virus
	Mouse group: mSN1
	sera dilution		Serum 1		Serum 2		Serum 3		Serum 4		Serum 5		Serum 6
	40		16.8	11.5	217.1	210.3	208.6	224.8	189.4	190.8	16.8	15.4	176.9	196.5
	120		21.9	25.6	210.9	238.9	236.9	214.3	204.7	207.2	33.2	102.8	188.5	156
	360		31.3	27.9	216.5	217.7	219.9	203.5	185.4	172.7	73.7	71.7	192.5	224.2
	1080		44	44	175	197	164.2	181.5	151.2	158	109.3	121.5	152.9	158
	3240		59.8	58.1	141	143	124.9	135.9	134.8	135.4	110.5	110.7	141.9	146.7
	9720		71.4	71.7	105.7	101.4	105.1	107.4	92.4	99.4	102.8	113.9	100	87.6
	29160		85.9	82.2	102.5	105.1	102.3	117.3	104	105.4	101.4	102.3	97.7	107.1
	PR8 N1
	sera dilution		Serum 1		Serum 2		Serum 3		Serum 4		Serum 5		Serum 6
	40		-5.1	-4.4	-9.1	-6.3	3.7	-0.8	-5.9	0.9	1.4	3.7	-2.9	-3.1
	120		-5.9	-6.6	-7.4	-4.4	-4	-1.2	-5.1	-2.3	8.6	4.6	3.1	2.2
	360		-3.6	-6.6	-6.6	-5.5	-1.6	0.3	-1.9	2.6	0.7	-1.9	6.5	3.5
	1080		9.7	5	-3.6	-1.6	3.7	5.4	-3.8	4.6	4.8	11.2	5	6.3
	3240		34.3	34.1	8	6.3	8	15.5	9.3	11.8	12.1	15.5	5.4	10.6
	9720		64.3	63	42.4	45.6	24.7	33	30	45.2	43.9	43.1	18.3	27
	29160		92.3	81.4	75.8	73	69	80.3	73	81.2	84	82	55.5	67
	PR8 hybrid
	sera dilution		Serum 1		Serum 2		Serum 3		Serum 4		Serum 5		Serum 6
	40		10.5	3.5	4.5	9.5	9.5	7.4	11.8	6.1	5.6	5.3	10.5	16.7
	120		3.7	12.6	3.2	4.2	4.2	2.4	4.2	4.8	5.8	4.5	9.7	16.5
	360		4.5	-1	5.8	4.2	2.7	2.7	13.4	5.3	4.8	3.7	10.8	12.8
	1080		11.3	4.8	14.4	15.2	5.8	6.1	7.6	9.7	5.8	8.7	11.8	21.9
	3240		45.9	25.8	35.5	38.1	15.2	19.9	18.6	24.5	38.3	49	29.7	32.6
	9720		59.9	63.1	72.4	68.3	45.6	39.1	43.3	49.5	70.1	80.7	57.1	67
	29160		58.6	80.7	93.2	82	78.7	80.7	84.1	84.9	91.7	90.1	80.2	162.7
	mS hybrid
	sera dilution		Serum 1		Serum 2		Serum 3		Serum 4		Serum 5		Serum 6
	40		11.4	7.3	-2.6	-0.9	14.7	10.4	14.2	19.6	17.3	17	3.7	6.8
	120		19.1	18	-8	-2.6	20.6	20.3	23.4	39.5	39.2	30.3	16.8	14.7
	360		36.7	28.3	-0.3	-2.6	30.8	38.7	47.7	50.7	55.1	50.5	64	17.3
	1080		76.8	74.2	10.1	9.9	67.6	72.7	70.9		88.5	102	46.6	71.7
	3240		95.7	95.1	61.7	51.7	83.9	90.3	98.2	99	101.3	99.2	81.9	102
	9720		155.4	84.9	77.8	59.9	85.7	79.6	92.6	94.4	107.7	104.3	99.5	109.4
	29160		97.4	96.2	89.8	91.3	88	98.7	97.4	98.2	95.7	112.5	104.6	115.8
	Controls
	sera dilution		Empty VLP Pool		AG7C (0.4 mg/mL)
	40		156	172.6	7.6	7.1
	120		158.5	170.8	4.8	4.8
	360		128.3	129.9	4.4	4.7
	1080		130.6	122.7	6.8	5.6
	3240		114.1	104.7	7.2	6.9
	9720		95.4	94.6	14.7	13.5
	29160		96.2	94.9	42.9	44.1
	IC50 titres
		mSN1	PR8	PR8 hybrid	mS hybrid	AG7C (0.4 mg/mL)
	Mouse 1	1743	5746	5023	577	34021
	Mouse 2	20	11440	4887	3084
	Mouse 3	20	18145	12006	567
	Mouse 4	20	13754	10736	358
	Mouse 5	86	11572	4023	295
	Mouse 6	20	23334	7044	617
