# Supplementary material for: Structure-guided loop grafting improves expression and stability of influenza neuraminidase for vaccine development
Source: eLife. 2025 Sep 9;14:RP105317. doi: 10.7554/eLife.105317 (PMC12419796; doi:10.7554/eLife.105317)
Supplement: Figure 7—source data 2. [file elife-105317-fig7-data2.xlsx]

## Sheet: ELLA_PR8 virus
	Pooled Sera Groups
	sera dilution		PR8 N1		mSN1		PR8 hybrid		mS hybrid		Empty VLP		mAb AG7C (1.6 mg/mL)		Naïve group
	160		14.1	13.3	128.5	132.1	20.7	15.5	136.8	131.3	129	124	12.9	11.7	117.9	104.3
	320		13.7	14.1	163.1	128.5	21.7	23.5	117	119.4	113.2	117.4	11.9	12.5	130.5	132.3
	640		18.4	23.3	126.9	124.3	58.9	58.6	109.4	104.9	115.8	101.2	10.8	12.3	110.3	117.6
	1280		63.7	60.1	122.3	118.8	123	124.7	102.5	120.7	111.9	104.6	13.8	12	111	123.1
	2560		107.1	113.4	112	91.1	103.5	113.4	100.6	105.4	114.3	123.2	11.4	12.5	106.6	114.3
	5120		101.1	113	102.7	106.1	97.3	119.6	96	101	82.1	102.1	11.3	12.6	86.3	114.3
	10240		92	95.5	97.7	96	103.9	105.4	88.2	103.7	96.3	89.9	13.4	14.8	108.6	108.9
	20480		92.3	103.6	97.3	99.6	96.7	102.5	110.4	97.3	99.7	93.4	15.9	16.2	78.6	87.2
	40960		87.5	86.1	89.3	94	94.9	94.8	92.4	100	98.2	92.6	24.5	25.1	75.1	95.7
	81920		102.9	91.9	96.2	95.5	99.6	113.1	99.3	106.3	94.6	99.6	49.5	54.9	79	85.7
	163840		89.2	104.9	88.1	106.4	101.3	112.3	101.9	110.6	97.2	102.7	73.5	77.7	89.1	79
