# Supplementary material for: Structure-guided loop grafting improves expression and stability of influenza neuraminidase for vaccine development
Source: eLife. 2025 Sep 9;14:RP105317. doi: 10.7554/eLife.105317 (PMC12419796; doi:10.7554/eLife.105317)
Supplement: Figure 7—source data 3. [file elife-105317-fig7-data3.xlsx]

## Sheet: Weight Curves
	Day p.i.	msN1						PR8 N1						PR8 hybrid						mS hybrid						Empty VLP (NC)						mAb AG7C 10 mg/kg (PC)
		Mouse 1	Mouse 2	Mouse 3	Mouse 4	Mouse 5	Mouse 6	Mouse 1	Mouse 2	Mouse 3	Mouse 4	Mouse 5	Mouse 6	Mouse 1	Mouse 2	Mouse 3	Mouse 4	Mouse 5	Mouse 6	Mouse 1	Mouse 2	Mouse 3	Mouse 4	Mouse 5	Mouse 6	Mouse 1	Mouse 2	Mouse 3	Mouse 4	Mouse 5	Mouse 6	Mouse 1	Mouse 2	Mouse 3	Mouse 4	Mouse 5	Mouse 6
	0	100	100	100	100	100	100	100	100	100	100	100	100	100	100	100	100	100	100	100	100	100	100	100	100	100	100	100	100	100	None	100	100	100	100	100	100
	1	101.3	100.4	101.6	97.7	100	97.7	99.2	103.2	100.9	98.8	99	99.6	99.5	100.4	100.4	99.6	100.9	99.6	98.7	100.5	97.4	99.6	99.6	99.2	100.9	100	99.6	99.6	99.5		100	100	97	101.3	100	100.9
	2	99.6	100.4	102.4	98.1	98	96.8	100	100.9	100	98.8	97.1	99.1	97.7	98.3	98.3	98.3	99.5	98.3	98.7	99	97	98.2	97.8	97.9	100	98.5	95.7	98.7	98.1		99.2	97	97	100.8	99.2	98.7
	3	98.2	98.2	98.4	96.3	96.1	89	99.6	98.6	98.3	96.3	97.5	98.7	98.6	97	97.8	97.5	97.3	98.3	94.6	90	94	94.2	90.5	91.7	94.5	89.1	84.4	91.3	90.7		97.9	97	96.6	100.4	95.3	98.7
	4	87.7	90.2	96.7	86.5	86.8	81.7	96.2	99.5	94.8	93.5	90.7	93	95	94.8	96.5	97.5	96.8	97.9	85.4	82.8	86.4	85.8	84.1	86.4	86.8	83.6	78.8	83.9	83.8		97.5	97	97.4	100.8	95.3	99.1
	5	87.3	85.3	89.8	85.1	80	76.6	95.8	99.5	93.5	93.5	92.6	93.9	89.9	93	93.9	94.5	97.7	98.3	79.1	78.5	79.6	79.1	79.7	79.8	79.5	78.1		78.7	79.2		96.2	95.7	96.6	99.6	97	100.4
	6	78.9	82.7	89	79.1			94.9	98.6	96.1	94.3	95.1	95.6	91.7	94.3	97.4	92.9	97.3	96.6													96.6	95.7	97	101.3	96.2	98.7
	7		86.7	92.3				95.3	98.6	97	95.5	94.1	95.2	93.1	94.8	95.2	92.4	95	94.5													95	93	93.6	99.2	95.3	98.7
	8		90.2	95.1				97.5	99.5	96.5	97.1	93.6	96.5	97.7	94.3	94.8	95.4	97.3	95.4													95.8	93.9	94	101.3	96.2	99.1
	9		91.6	96.7				99.2	102.7	98.3	99.2	96.6	97.4	95.4	94.3	96.1	96.6	95.9	96.2													97.1	93.5	95.3	101.3	96.2	100.9
	12		97.8	95.1				100.8	102.3	100.4	96.3	97.1	97.8	94	93.9	95.2	93.7	95.4	94.5													97.5	93.9	94.8	102.5	98.7	100.9
	14		96	97.6				98.7	105	99.1	97.6	97.5	99.1	95	94.3	96.1	95.8	95.9	96.2													97.1	96.5	96.1	101.3	96.6	99.6
